# Supplementary material for: Psychometric Properties of the Spanish Version of the Child Problematic Traits Inventory in 3- to 12-Year-Old Spanish Children
Source: Atypon-hosted journal article supplement (doi:10.1027/1015-5759/a000458), 2018-02-16
Supplement: 1015-5759_a000458_esm1.pdf [file 1015-5759_a000458_esm1.pdf]

**Table 1**

Spss Syntax: Means by sex by sample and total sample.

```
* Scales.
COMPUTE GD=mean(cpti05_M,cpti07_M,cpti09_M,cpti15_M,cpti18_M,cpti21_M,cpti24_M,cpti26_M).
COMPUTE
CU=mean(cpti02_M,cpti04_M,cpti08_M,cpti11_M,cpti13_M,cpti17_M,cpti20_M,cpti22_M,cpti25_M,cpti27_M).
COMPUTE
INS=mean(cpti01_M,cpti03_M,cpti06_M,cpti10_M,cpti12_M,cpti14_M,cpti16_M,cpti19_M,cpti23_M,cpti28_M).
COMPUTE PT=mean(cpti01_M to cpti28_M).
```

```
*Descriptives.
SPLIT FILE LAYERED BY Sexo Muestra.
FREQUENCIES VARIABLES=GD CU INS PT
  /FORMAT=NOTABLE
  /NTILES=4
  /STATISTICS=STDDEV MINIMUM MAXIMUM SEMEAN MEAN
  /ORDER=ANALYSIS.
```

```
SPLIT FILE LAYERED BY CursBin Muestra.
FREQUENCIES VARIABLES=GD CU INS PT
  /FORMAT=NOTABLE
  /NTILES=4
  /STATISTICS=STDDEV MINIMUM MAXIMUM SEMEAN MEAN
  /ORDER=ANALYSIS.
```

**Statistics**

|                    |         | GD     | CU     | INS    | PT     |
|--------------------|---------|--------|--------|--------|--------|
| N                  | Valid   | 842    | 842    | 842    | 842    |
|                    | Missing | 0      | 0      | 0      | 0      |
| Mean               |         | 1,3373 | 1,3776 | 1,5525 | 1,4285 |
| Std. Error of Mean |         | ,01922 | ,01961 | ,02204 | ,01842 |
| Std. Deviation     |         | ,55784 | ,56902 | ,63963 | ,53456 |
| Minimum            |         | 1      | 1      | 1      | 1      |
| Maximum            |         | 4      | 4      | 4      | 4      |
| Percentiles        | 25      | 1,0000 | 1,0000 | 1,0000 | 1,0000 |
|                    | 50      | 1,0000 | 1,1000 | 1,3000 | 1,2143 |
|                    | 75      | 1,5000 | 1,6000 | 2,0000 | 1,6429 |

**Statistics**

| Gender      | Study     |                    |         | GD     | CU     | INS    | PT     |        |
|-------------|-----------|--------------------|---------|--------|--------|--------|--------|--------|
| Male        | Catalunya | N                  | Valid   | 192    | 192    | 192    | 192    |        |
|             |           |                    | Missing | 0      | 0      | 0      | 0      |        |
|             |           | Mean               |         | 1,2383 | 1,2563 | 1,4000 | 1,3025 |        |
|             |           | Std. Error of Mean |         | ,03194 | ,03505 | ,03968 | ,03196 |        |
|             |           | Std. Deviation     |         | ,44257 | ,48567 | ,54982 | ,44285 |        |
|             |           | Minimum            |         | 1,00   | 1,00   | 1,00   | 1,00   |        |
|             |           | Maximum            |         | 3,38   | 3,40   | 3,30   | 3,25   |        |
|             |           | Percentiles        | 25      |        | 1,0000 | 1,0000 | 1,0000 | 1,0000 |
|             |           |                    | 50      |        | 1,0000 | 1,0000 | 1,2000 | 1,1071 |
|             | 75        |                    |         | 1,3750 | 1,3000 | 1,6000 | 1,4911 |        |
|             | Galicia   | N                  | Valid   | 218    | 218    | 218    | 218    |        |
|             |           |                    | Missing | 0      | 0      | 0      | 0      |        |
|             |           | Mean               |         | 1,5854 | 1,6917 | 1,9023 | 1,7366 |        |
|             |           | Std. Error of Mean |         | ,04895 | ,04777 | ,04802 | ,04263 |        |
|             |           | Std. Deviation     |         | ,72278 | ,70536 | ,70896 | ,62936 |        |
| Minimum     |           |                    | 1,00    | 1,00   | 1,00   | 1,00   |        |        |
| Maximum     |           |                    | 4,00    | 4,00   | 4,00   | 3,61   |        |        |
| Percentiles |           | 25                 |         | 1,0000 | 1,0000 | 1,3000 | 1,2143 |        |
|             |           | 50                 |         | 1,2500 | 1,5000 | 1,8500 | 1,5714 |        |
|             | 75        |                    | 2,0313  | 2,1000 | 2,3000 | 2,1429 |        |        |
| Female      | Catalunya | N                  | Valid   | 201    | 201    | 201    | 201    |        |
|             |           |                    | Missing | 0      | 0      | 0      | 0      |        |
|             |           | Mean               |         | 1,1101 | 1,0856 | 1,1274 | 1,1075 |        |
|             |           | Std. Error of Mean |         | ,02054 | ,01417 | ,01669 | ,01409 |        |
|             |           | Std. Deviation     |         | ,29116 | ,20085 | ,23664 | ,19981 |        |
|             |           | Minimum            |         | 1,00   | 1,00   | 1,00   | 1,00   |        |
|             |           | Maximum            |         | 2,88   | 2,10   | 2,20   | 2,04   |        |
|             |           | Percentiles        | 25      |        | 1,0000 | 1,0000 | 1,0000 | 1,0000 |
|             |           |                    | 50      |        | 1,0000 | 1,0000 | 1,0000 | 1,0000 |
|             | 75        |                    |         | 1,0000 | 1,0000 | 1,2000 | 1,1071 |        |
|             | Galicia   | N                  | Valid   | 231    | 231    | 231    | 231    |        |
|             |           |                    | Missing | 0      | 0      | 0      | 0      |        |
|             |           | Mean               |         | 1,3831 | 1,4359 | 1,7190 | 1,5220 |        |
|             |           | Std. Error of Mean |         | ,03573 | ,03602 | ,04166 | ,03428 |        |
|             |           | Std. Deviation     |         | ,54299 | ,54753 | ,63313 | ,52108 |        |
|             |           | Minimum            |         | 1,00   | 1,00   | 1,00   | 1,00   |        |
|             |           | Maximum            |         | 3,88   | 3,10   | 4,00   | 3,50   |        |
|             |           | Percentiles        | 25      |        | 1,0000 | 1,0000 | 1,2000 | 1,1071 |
| 50          |           |                    |         | 1,1250 | 1,2000 | 1,6000 | 1,3571 |        |
| 75          |           |                    | 1,6250  | 1,7000 | 2,1000 | 1,7500 |        |        |

**Statistics**

| CursBin     | Study     |                    |         | GD     | CU     | INS    | PT     |
|-------------|-----------|--------------------|---------|--------|--------|--------|--------|
| Preescolar  | Catalunya | N                  | Valid   | 99     | 99     | 99     | 99     |
|             |           |                    | Missing | 0      | 0      | 0      | 0      |
|             |           | Mean               |         | 1,0303 | 1,0727 | 1,1354 | 1,0830 |
|             |           | Std. Error of Mean |         | ,01270 | ,02009 | ,02369 | ,01650 |
|             |           | Std. Deviation     |         | ,12638 | ,19991 | ,23574 | ,16421 |
|             |           | Minimum            |         | 1,00   | 1,00   | 1,00   | 1,00   |
|             |           | Maximum            |         | 1,88   | 2,60   | 2,10   | 2,18   |
|             |           | Percentiles        | 25      | 1,0000 | 1,0000 | 1,0000 | 1,0000 |
|             |           |                    | 50      | 1,0000 | 1,0000 | 1,0000 | 1,0000 |
|             | 75        |                    | 1,0000  | 1,1000 | 1,2000 | 1,1071 |        |
|             | Galicia   | N                  | Valid   | 214    | 214    | 214    | 214    |
|             |           |                    | Missing | 0      | 0      | 0      | 0      |
|             |           | Mean               |         | 1,3768 | 1,5318 | 1,7949 | 1,5814 |
|             |           | Std. Error of Mean |         | ,03638 | ,04272 | ,04480 | ,03718 |
|             |           | Std. Deviation     |         | ,53219 | ,62500 | ,65544 | ,54396 |
| Minimum     |           |                    | 1,00    | 1,00   | 1,00   | 1,00   |        |
| Maximum     |           |                    | 3,75    | 4,00   | 4,00   | 3,54   |        |
| Percentiles |           | 25                 | 1,0000  | 1,0000 | 1,2000 | 1,1429 |        |
|             |           | 50                 | 1,1250  | 1,2000 | 1,7000 | 1,4286 |        |
|             | 75        | 1,6563             | 2,0000  | 2,2000 | 1,9018 |        |        |
| Primaria    | Catalunya | N                  | Valid   | 294    | 294    | 294    | 294    |
|             |           |                    | Missing | 0      | 0      | 0      | 0      |
|             |           | Mean               |         | 1,2207 | 1,2014 | 1,3027 | 1,2431 |
|             |           | Std. Error of Mean |         | ,02451 | ,02429 | ,02824 | ,02276 |
|             |           | Std. Deviation     |         | ,42019 | ,41655 | ,48428 | ,39031 |
|             |           | Minimum            |         | 1,00   | 1,00   | 1,00   | 1,00   |
|             |           | Maximum            |         | 3,38   | 3,40   | 3,30   | 3,25   |
|             |           | Percentiles        | 25      | 1,0000 | 1,0000 | 1,0000 | 1,0000 |
|             |           |                    | 50      | 1,0000 | 1,0000 | 1,1000 | 1,0714 |
|             | 75        |                    | 1,2500  | 1,2000 | 1,4000 | 1,3214 |        |
|             | Galicia   | N                  | Valid   | 235    | 235    | 235    | 235    |
|             |           |                    | Missing | 0      | 0      | 0      | 0      |
|             |           | Mean               |         | 1,5766 | 1,5860 | 1,8200 | 1,6669 |
|             |           | Std. Error of Mean |         | ,04690 | ,04280 | ,04542 | ,04039 |
|             |           | Std. Deviation     |         | ,71899 | ,65608 | ,69632 | ,61923 |
| Minimum     |           |                    | 1,00    | 1,00   | 1,00   | 1,00   |        |
| Maximum     |           |                    | 4,00    | 3,60   | 4,00   | 3,61   |        |
| Percentiles |           | 25                 | 1,0000  | 1,0000 | 1,2000 | 1,1429 |        |
|             |           | 50                 | 1,2500  | 1,3000 | 1,7000 | 1,5000 |        |
|             | 75        | 2,0000             | 2,0000  | 2,2000 | 2,0357 |        |        |

**Table 2**

*Zero-order and partial correlations between the CPTI Total and the three factors, and external criteria measured in Study 1 and Study 2*

```
* Study 1.
SELECT IF muestra EQ 1.
PARTIAL CORR
  /VARIABLES=GD_M
with TOTALAPSD NARC CU.APSD IMP FEARLESS_M CP AG.REACT AG.PROACT HIPERACT PROSOCIAL BY sexo
edadA CU_M INS_M
  /SIGNIFICANCE=TWOTAIL
  /MISSING=LISTWISE.

CORRELATIONS /VARIABLES=GD_M
with TOTALAPSD NARC CU.APSD IMP FEARLESS_M CP AG.REACT AG.PROACT HIPERACT PROSOCIAL
  /MISSING=LISTWISE.

PARTIAL CORR
  /VARIABLES=CU_M
with TOTALAPSD NARC CU.APSD IMP FEARLESS_M CP AG.REACT AG.PROACT HIPERACT PROSOCIAL BY sexo
edadA GD_M INS_M
  /SIGNIFICANCE=TWOTAIL
  /MISSING=LISTWISE.

CORRELATIONS /VARIABLES=CU_M
with TOTALAPSD NARC CU.APSD IMP FEARLESS_M CP AG.REACT AG.PROACT HIPERACT PROSOCIAL
  /MISSING=LISTWISE.

PARTIAL CORR
  /VARIABLES=INS_P
with TOTALAPSD NARC CU.APSD IMP FEARLESS_M CP AG.REACT AG.PROACT HIPERACT PROSOCIAL BY sexo
edadA CU_P
  GD_P
  /SIGNIFICANCE=TWOTAIL
  /MISSING=LISTWISE.

CORRELATIONS /VARIABLES=INS_P
with TOTALAPSD NARC CU.APSD IMP FEARLESS_M CP AG.REACT AG.PROACT HIPERACT PROSOCIAL
  /MISSING=LISTWISE.

PARTIAL CORR
  /VARIABLES=INS_P
with TOTALAPSD NARC CU.APSD IMP FEARLESS_M CP AG.REACT AG.PROACT HIPERACT PROSOCIAL BY sexo
edadA CU_P GD_P
  /SIGNIFICANCE=TWOTAIL
  /MISSING=LISTWISE.

CORRELATIONS
  /VARIABLES=INS_P
with TOTALAPSD NARC CU.APSD IMP FEARLESS_M CP AG.REACT AG.PROACT HIPERACT PROSOCIAL
  /MISSING=LISTWISE.

*Study 2.

SELECT IF muestra EQ 0.
PARTIAL CORR
  /VARIABLES=GD_M
with CSImADHDDesDim CSImADHDHipImpDim CSImADHDCombDim CSImODDDim BY sexo edadA CU_M INS_M
  /SIGNIFICANCE=TWOTAIL
  /MISSING=LISTWISE.

TEMPORARY.
SELECT IF muestra EQ 0.
PARTIAL CORR
  /VARIABLES=CU_M
with CSIpADHDDesDim CSIpADHDHipImpDim CSIpADHDCombDim CSIpODDDim BY sexo edadA GD_M INS_M
  /SIGNIFICANCE=TWOTAIL
  /MISSING=LISTWISE.
```

```

TEMPORARY.
SELECT IF muestra EQ 0.
PARTIAL CORR
  /VARIABLES=INS_M
  with CSIpADHDDesDim CSIpADHDHipImpDim CSIpADHDCCombDim CSIpODDDim BY sexo edadA GD_M CU_M
  /SIGNIFICANCE=TWOTAIL
  /MISSING=LISTWISE.

TEMPORARY.
SELECT IF muestra EQ 0.
PARTIAL CORR
  /VARIABLES=CPTI.TOTAL_M
  with CSIpADHDDesDim CSIpADHDHipImpDim CSIpADHDCCombDim CSIpODDDim BY sexo edadA
  /SIGNIFICANCE=TWOTAIL
  /MISSING=LISTWISE.

*APSD.

RECODE
apsd3 apsd7 apsd12 apsd18 apsd20
(0=2) (1=1) (2=0) INTO rapsd3 rapsd7 rapsd12 rapsd18 rapsd20.
EXECUTE.

RELIABILITY
/VARIABLES=rapsd3, rapsd7, rapsd12, rapsd18, apsd19, rapsd20
/SCALE('CU') ALL
/MODEL=ALPHA
/SUMMARY=TOTAL CORR.

RELIABILITY
/VARIABLES=apsd5, apsd8, apsd10, apsd11, apsd14, apsd15, apsd16
/SCALE('Narcissism') ALL
/MODEL=ALPHA
/SUMMARY=TOTAL CORR.

RELIABILITY
/VARIABLES=apsd1, apsd4, apsd9, apsd13, apsd17
/SCALE('Impulsivity') ALL
/MODEL=ALPHA
/SUMMARY=TOTAL CORR.

RELIABILITY
/VARIABLES=apsd1 , apsd2, rapsd3, apsd4, apsd5, apsd6, rapsd7, apsd8,
apsd9, apsd10, apsd11, rapsd12, apsd13, apsd14, apsd15, apsd16, apsd17, rapsd18, apsd19,
rapsd20
/SCALE('Global') ALL
/MODEL=ALPHA
/SUMMARY=TOTAL CORR.

*SDQ.
RELIABILITY
/VARIABLES=sdq1, sdq3, sdq4, sdq7, sdq8
/SCALE('Prosocial behavior') ALL
/MODEL=ALPHA
/SUMMARY=TOTAL CORR.

RELIABILITY
/VARIABLES=sdq2, sdq5, sdq6, rsdq9, rsdq10
/SCALE('Hiperactivity') ALL
/MODEL=ALPHA
/SUMMARY=TOTAL CORR.

*CSI.
RELIABILITY
/VARIABLES=CsiA1_M CsiA2_M CsiA3_M CsiA4_M CsiA5_M CsiA6_M CsiA7_M CsiA8_M CsiA9_M
/SCALE('ALL VARIABLES') ALL
/MODEL=ALPHA
/STATISTICS=DESCRIPTIVE SCALE CORR
/SUMMARY=TOTAL MEANS CORR.

RELIABILITY

```

```

/VARIABLES=CsiA10_M CsiA11_M CsiA12_M CsiA13_M CsiA14_M CsiA15_M CsiA16_M CsiA17_M
CsiA18_M
/SCALE('ALL VARIABLES') ALL
/MODEL=ALPHA
/STATISTICS=DESCRIPTIVE SCALE CORR
/SUMMARY=TOTAL MEANS CORR.

```

RELIABILITY

```

/VARIABLES=CsiA1_M CsiA2_M CsiA3_M CsiA4_M CsiA5_M CsiA6_M CsiA7_M CsiA8_M CsiA9_M
CsiA10_M CsiA11_M CsiA12_M CsiA13_M CsiA14_M CsiA15_M CsiA16_M CsiA17_M CsiA18_M
/SCALE('ALL VARIABLES') ALL
/MODEL=ALPHA
/STATISTICS=DESCRIPTIVE SCALE CORR
/SUMMARY=TOTAL MEANS CORR.

```

**Correlations**

|                                 | Control Variables                                                                             |                             |     |
|---------------------------------|-----------------------------------------------------------------------------------------------|-----------------------------|-----|
|                                 | Gender & Edat Anys & Callous-unemotional<br>maestros & Impulsive-need of stimulation maestros |                             |     |
|                                 | Grandiose-deceitful maestros                                                                  |                             |     |
|                                 | Correlation                                                                                   | Significance (2-<br>tailed) | df  |
| Global score APSD               | ,446                                                                                          | ,000                        | 439 |
| Narcissism                      | ,612                                                                                          | ,000                        | 439 |
| Callous-unemotional             | -,033                                                                                         | ,483                        | 439 |
| Impulsivity/conduct<br>problems | ,088                                                                                          | ,065                        | 439 |
| Fearlessness Maestros           | -,003                                                                                         | ,955                        | 439 |
| Conduct problems                | ,382                                                                                          | ,000                        | 439 |
| Agresión reactiva               | ,372                                                                                          | ,000                        | 439 |
| Agresión proactiva              | ,461                                                                                          | ,000                        | 439 |
| hyperactivity                   | -,106                                                                                         | ,025                        | 439 |
| Conducta prosocial              | -,020                                                                                         | ,670                        | 439 |

**Correlations<sup>a</sup>**

|                                 | Grandiose-deceitful maestros |                 |
|---------------------------------|------------------------------|-----------------|
|                                 | Pearson                      |                 |
|                                 | Correlation                  | Sig. (2-tailed) |
| Global score APSD               | ,843                         | ,000            |
| Narcissism                      | ,862                         | ,000            |
| Callous-unemotional             | ,456                         | ,000            |
| Impulsivity/conduct<br>problems | ,697                         | ,000            |
| Fearlessness Maestros           | ,594                         | ,000            |
| Conduct problems                | ,785                         | ,000            |
| Agresión reactiva               | ,757                         | ,000            |
| Agresión proactiva              | ,701                         | ,000            |
| hyperactivity                   | ,520                         | ,000            |
| Conducta prosocial              | -,477                        | ,000            |

a. Listwise N=445

**Correlations**

|                              | Control Variables                                                                          |                         |     |
|------------------------------|--------------------------------------------------------------------------------------------|-------------------------|-----|
|                              | Gender & Edad Anys & Grandiose-deceitful maestros & Impulsive-need of stimulation maestros |                         |     |
|                              | Callous-unemotional maestros                                                               |                         |     |
|                              | Correlation                                                                                | Significance (2-tailed) | df  |
| Global score APSD            | ,465                                                                                       | ,000                    | 439 |
| Narcissism                   | ,213                                                                                       | ,000                    | 439 |
| Callous-unemotional          | ,386                                                                                       | ,000                    | 439 |
| Impulsivity/conduct problems | ,321                                                                                       | ,000                    | 439 |
| Fearlessness Maestros        | ,316                                                                                       | ,000                    | 439 |
| Conduct problems             | ,288                                                                                       | ,000                    | 439 |
| Agresión reactiva            | ,205                                                                                       | ,000                    | 439 |
| Agresión proactiva           | ,062                                                                                       | ,195                    | 439 |
| hyperactivity                | ,210                                                                                       | ,000                    | 439 |
| Conducta prosocial           | -,422                                                                                      | ,000                    | 439 |

**Correlations<sup>a</sup>**

|                              | Callous-unemotional maestros |                 |
|------------------------------|------------------------------|-----------------|
|                              | Pearson Correlation          | Sig. (2-tailed) |
| Global score APSD            | ,839                         | ,000            |
| Narcissism                   | ,752                         | ,000            |
| Callous-unemotional          | ,592                         | ,000            |
| Impulsivity/conduct problems | ,727                         | ,000            |
| Fearlessness Maestros        | ,661                         | ,000            |
| Conduct problems             | ,762                         | ,000            |
| Agresión reactiva            | ,709                         | ,000            |
| Agresión proactiva           | ,581                         | ,000            |
| hyperactivity                | ,576                         | ,000            |
| Conducta prosocial           | -,616                        | ,000            |

a. Listwise N=445

**Correlations<sup>a</sup>**

|                              | INS                 |                 |
|------------------------------|---------------------|-----------------|
|                              | Pearson Correlation | Sig. (2-tailed) |
| Global score APSD            | ,742                | ,000            |
| Narcissism                   | ,621                | ,000            |
| Callous-unemotional          | ,446                | ,000            |
| Impulsivity/conduct problems | ,782                | ,000            |
| Fearlessness Maestros        | ,664                | ,000            |
| Conduct problems             | ,734                | ,000            |
| Agresión reactiva            | ,658                | ,000            |
| Agresión proactiva           | ,464                | ,000            |
| hyperactivity                | ,743                | ,000            |
| Conducta prosocial           | -,392               | ,000            |

a. Listwise N=445

**Correlations**

|                              | Control Variables            |                         |     |
|------------------------------|------------------------------|-------------------------|-----|
|                              | Gender & Edad Anys & CU & GD |                         |     |
|                              | INS                          |                         |     |
|                              | Correlation                  | Significance (2-tailed) | df  |
| Global score APSD            | ,373                         | ,000                    | 439 |
| Narcissism                   | ,071                         | ,136                    | 439 |
| Callous-unemotional          | ,104                         | ,028                    | 439 |
| Impulsivity/conduct problems | ,560                         | ,000                    | 439 |
| Fearlessness Maestros        | ,395                         | ,000                    | 439 |
| Conduct problems             | ,387                         | ,000                    | 439 |
| Agresión reactiva            | ,253                         | ,000                    | 439 |
| Agresión proactiva           | -,028                        | ,558                    | 439 |
| hyperactivity                | ,590                         | ,000                    | 439 |
| Conducta prosocial           | ,024                         | ,619                    | 439 |

**Correlations<sup>a</sup>**

|                              | INS                 |                 |
|------------------------------|---------------------|-----------------|
|                              | Pearson Correlation | Sig. (2-tailed) |
| Global score APSD            | ,742                | ,000            |
| Narcissism                   | ,621                | ,000            |
| Callous-unemotional          | ,446                | ,000            |
| Impulsivity/conduct problems | ,782                | ,000            |
| Fearlessness Maestros        | ,664                | ,000            |
| Conduct problems             | ,734                | ,000            |
| Agresión reactiva            | ,658                | ,000            |
| Agresión proactiva           | ,464                | ,000            |
| hyperactivity                | ,743                | ,000            |
| Conducta prosocial           | -,392               | ,000            |

a. Listwise N=445



**Correlations**

|                                                            | Control Variables                                                                          |                         |     |
|------------------------------------------------------------|--------------------------------------------------------------------------------------------|-------------------------|-----|
|                                                            | Gender & Edat Anys & Callous-unemotional maestros & Impulsive-need of stimulation maestros |                         |     |
|                                                            | Grandiose-deceitful maestros                                                               |                         |     |
|                                                            | Correlation                                                                                | Significance (2-tailed) | df  |
| CSI Maestros: AD-HD Tipo Desatento Dimensional             | -,147                                                                                      | ,017                    | 260 |
| CSI Maestros: AD-HD Tipo Hiperactivo-Impulsivo Dimensional | -,073                                                                                      | ,240                    | 260 |
| CSI Maestros: AD-HD Tipo Combinado Dimensional             | -,151                                                                                      | ,015                    | 260 |
| CSI Maestros: ODD Dimensional                              | ,163                                                                                       | ,008                    | 260 |

**Correlations**

|                                                          | Control Variables                                                                          |                         |     |
|----------------------------------------------------------|--------------------------------------------------------------------------------------------|-------------------------|-----|
|                                                          | Gender & Edat Anys & Grandiose-deceitful maestros & Impulsive-need of stimulation maestros |                         |     |
|                                                          | Callous-unemotional maestros                                                               |                         |     |
|                                                          | Correlation                                                                                | Significance (2-tailed) | df  |
| CSI Padres: AD-HD Tipo Desatento Dimensional             | -,083                                                                                      | ,365                    | 119 |
| CSI Padres: AD-HD Tipo Hiperactivo-Impulsivo Dimensional | -,103                                                                                      | ,259                    | 119 |
| CSI Padres: AD-HD Tipo Combinado Dimensional             | -,107                                                                                      | ,242                    | 119 |
| CSI Padres: ODD Dimensional                              | -,025                                                                                      | ,783                    | 119 |

**Correlations**

|                                                          | Control Variables                                                                |                         |     |
|----------------------------------------------------------|----------------------------------------------------------------------------------|-------------------------|-----|
|                                                          | Gender & Edat Anys & Grandiose-deceitful maestros & Callous-unemotional maestros |                         |     |
|                                                          | Impulsive-need of stimulation maestros                                           |                         |     |
|                                                          | Correlation                                                                      | Significance (2-tailed) | df  |
| CSI Padres: AD-HD Tipo Desatento Dimensional             | ,106                                                                             | ,247                    | 119 |
| CSI Padres: AD-HD Tipo Hiperactivo-Impulsivo Dimensional | ,198                                                                             | ,030                    | 119 |
| CSI Padres: AD-HD Tipo Combinado Dimensional             | ,177                                                                             | ,052                    | 119 |
| CSI Padres: ODD Dimensional                              | ,011                                                                             | ,901                    | 119 |

**Correlations**

|                                                          | Control Variables          |                         |     |
|----------------------------------------------------------|----------------------------|-------------------------|-----|
|                                                          | Gender & Edad Anys         |                         |     |
|                                                          | CPTI global score maestros |                         |     |
|                                                          | Correlation                | Significance (2-tailed) | df  |
| CSI Padres: AD-HD Tipo Desatento Dimensional             | ,352                       | ,000                    | 121 |
| CSI Padres: AD-HD Tipo Hiperactivo-Impulsivo Dimensional | ,406                       | ,000                    | 121 |
| CSI Padres: AD-HD Tipo Combinado Dimensional             | ,429                       | ,000                    | 121 |
| CSI Padres: ODD Dimensional                              | ,328                       | ,000                    | 121 |

**Reliability Statistics**

| Cronbach's Alpha | Cronbach's Alpha Based on Standardized Items | N of Items |
|------------------|----------------------------------------------|------------|
| ,681             | ,680                                         | 6          |

|                         | Mean | Minimum | Maximum | Range | Maximum / Minimum | Variance |
|-------------------------|------|---------|---------|-------|-------------------|----------|
| Inter-Item Correlations | ,261 | -,189   | ,605    | ,794  | -3,197            | ,040     |

**Reliability Statistics**

| Cronbach's Alpha | Cronbach's Alpha Based on Standardized Items | N of Items |
|------------------|----------------------------------------------|------------|
| ,868             | ,869                                         | 7          |

|                         | Mean | Minimum | Maximum | Range | Maximum / Minimum | Variance |
|-------------------------|------|---------|---------|-------|-------------------|----------|
| Inter-Item Correlations | ,486 | ,345    | ,673    | ,328  | 1,950             | ,007     |

**Reliability Statistics**

| Cronbach's Alpha | Cronbach's Alpha Based on Standardized Items | N of Items |
|------------------|----------------------------------------------|------------|
| ,810             | ,809                                         | 5          |

|                         | Mean | Minimum | Maximum | Range | Maximum / Minimum | Variance |
|-------------------------|------|---------|---------|-------|-------------------|----------|
| Inter-Item Correlations | ,458 | ,311    | ,577    | ,266  | 1,855             | ,007     |

**Reliability Statistics**

| Cronbach's Alpha | Cronbach's Alpha Based on Standardized Items | N of Items |
|------------------|----------------------------------------------|------------|
| ,906             | ,910                                         | 20         |

|                         | Mean | Minimum | Maximum | Range | Maximum / Minimum | Variance |
|-------------------------|------|---------|---------|-------|-------------------|----------|
| Inter-Item Correlations | ,335 | -,200   | ,711    | ,911  | -3,547            | ,028     |

**Reliability Statistics**

| Cronbach's Alpha | Cronbach's Alpha Based on Standardized Items | N of Items |
|------------------|----------------------------------------------|------------|
| ,876             | ,879                                         | 5          |

|                         | Mean | Minimum | Maximum | Range | Maximum / Minimum | Variance |
|-------------------------|------|---------|---------|-------|-------------------|----------|
| Inter-Item Correlations | ,592 | ,477    | ,667    | ,190  | 1,399             | ,004     |

**Reliability Statistics**

| Cronbach's Alpha | Cronbach's Alpha Based on Standardized Items | N of Items |
|------------------|----------------------------------------------|------------|
| ,839             | ,839                                         | 5          |

|                         | Mean | Minimum | Maximum | Range | Maximum / Minimum | Variance |
|-------------------------|------|---------|---------|-------|-------------------|----------|
| Inter-Item Correlations | ,511 | ,328    | ,810    | ,481  | 2,466             | ,027     |

**Reliability Statistics**

| Cronbach's Alpha | Cronbach's Alpha Based on Standardized Items | N of Items |
|------------------|----------------------------------------------|------------|
| ,956             | ,955                                         | 9          |

|                         | Mean  | Minimum | Maximum | Range | Maximum / Minimum | Variance |
|-------------------------|-------|---------|---------|-------|-------------------|----------|
| Item Means              | 1,691 | 1,386   | 2,014   | ,628  | 1,453             | ,043     |
| Inter-Item Correlations | ,704  | ,512    | ,867    | ,355  | 1,694             | ,008     |

**Reliability Statistics**

| Cronbach's Alpha | Cronbach's Alpha Based on Standardized Items | N of Items |
|------------------|----------------------------------------------|------------|
| ,933             | ,936                                         | 9          |

|                         | Mean  | Minimum | Maximum | Range | Maximum / Minimum | Variance |
|-------------------------|-------|---------|---------|-------|-------------------|----------|
| Item Means              | 1,241 | 1,117   | 1,361   | ,244  | 1,218             | ,006     |
| Inter-Item Correlations | ,618  | ,450    | ,862    | ,412  | 1,916             | ,012     |

**Reliability Statistics**

| Cronbach's Alpha | Cronbach's Alpha Based on Standardized Items | N of Items |
|------------------|----------------------------------------------|------------|
| ,946             | ,949                                         | 18         |

|                         | Mean  | Minimum | Maximum | Range | Maximum / Minimum | Variance |
|-------------------------|-------|---------|---------|-------|-------------------|----------|
| Item Means              | 1,464 | 1,117   | 2,010   | ,893  | 1,800             | ,076     |
| Inter-Item Correlations | ,506  | ,214    | ,867    | ,653  | 4,053             | ,032     |

## Others Spss analysis

```
* Descriptives of Sex, Grade and Age, by study and total .
SPLIT FILE LAYERED BY muestra.
FREQUENCIES VARIABLES=Sexo CursBin /ORDER=ANALYSIS.
DESCRIPTIVES EdadA.
```

### \* Reliabilities by study and total.

```
SPLIT FILE LAYERED BY muestra.
```

#### \*Grandiose-deceitful GD.

```
RELIABILITY VARIABLES = cpti05_M cpti07_M cpti09_M cpti15_M cpti18_M cpti21_M cpti24_M
cpti26_M
/MODEL=ALPHA /STATISTICS=DESCRIPTIVE SCALE CORR COV /SUMMARY=TOTAL MEANS VARIANCE COV
CORR.
```

#### \*Factor Calous-unemotional CU .

```
RELIABILITY VARIABLES= cpti02_M cpti04_M cpti08_M cpti11_M cpti13_M cpti17_M cpti20_M
cpti22_M cpti25_M cpti27_M
/MODEL=ALPHA /STATISTICS=DESCRIPTIVE SCALE CORR COV /SUMMARY=TOTAL MEANS VARIANCE COV
CORR.
```

#### \*Factor Impulsivity-need for stimulation INS.

```
RELIABILITY VARIABLES= cpti01_M cpti03_M cpti06_M cpti10_M cpti12_M cpti14_M cpti16_M
cpti19_M cpti23_M cpti28_M
/MODEL=ALPHA /STATISTICS=DESCRIPTIVE SCALE CORR COV /SUMMARY=TOTAL MEANS VARIANCE COV
CORR.
```

#### \*Total Score.

```
RELIABILITY VARIABLES = cpti01_M to cpti28_M
/MODEL=ALPHA /STATISTICS=DESCRIPTIVE SCALE CORR COV /SUMMARY=TOTAL MEANS VARIANCE COV
CORR.
```

#### \*Fearless.

```
SELECT IF muestra EQ 1.
RELIABILITY
/VARIABLES=fear01_M, fear02_M, fear03_M, fear04_M, fear05_M, fear06_M
/SCALE('Fearless') ALL
/MODEL=ALPHA
/SUMMARY=TOTAL CORR.
```

### Gender

| Study     |       |        | Frequency | Percent | Valid Percent | Cumulative Percent |
|-----------|-------|--------|-----------|---------|---------------|--------------------|
| Catalunya | Valid | Male   | 192       | 48,9    | 48,9          | 48,9               |
|           |       | Female | 201       | 51,1    | 51,1          | 100,0              |
|           |       | Total  | 393       | 100,0   | 100,0         |                    |
| Galicia   | Valid | Male   | 218       | 48,6    | 48,6          | 48,6               |
|           |       | Female | 231       | 51,4    | 51,4          | 100,0              |
|           |       | Total  | 449       | 100,0   | 100,0         |                    |

### Grade

| Study     |       |            | Frequency | Percent | Valid Percent | Cumulative Percent |
|-----------|-------|------------|-----------|---------|---------------|--------------------|
| Catalunya | Valid | Preschool  | 99        | 25,2    | 25,2          | 25,2               |
|           |       | Elementary | 294       | 74,8    | 74,8          | 100,0              |
|           |       | Total      | 393       | 100,0   | 100,0         |                    |
| Galicia   | Valid | Preschool  | 214       | 47,7    | 47,7          | 47,7               |
|           |       | Elementary | 235       | 52,3    | 52,3          | 100,0              |
|           |       | Total      | 449       | 100,0   | 100,0         |                    |

**Descriptive Statistics**

| Study     |                    | N   | Minimum | Maximum | Mean | Std. Deviation |
|-----------|--------------------|-----|---------|---------|------|----------------|
| Catalunya | Edat Anys          | 366 | 3       | 12      | 7,32 | 2,574          |
|           | Valid N (listwise) | 366 |         |         |      |                |
| Galicia   | Edat Anys          | 449 | 3       | 12      | 6,82 | 2,685          |
|           | Valid N (listwise) | 449 |         |         |      |                |

**Reliability Statistics**

| Study     | Cronbach's Alpha | Cronbach's Alpha Based on Standardized Items | N of Items |
|-----------|------------------|----------------------------------------------|------------|
| Catalunya | ,895             | ,893                                         | 8          |
| Galicia   | ,933             | ,932                                         | 8          |

**Reliability Statistics**

| Study     | Cronbach's Alpha | Cronbach's Alpha Based on Standardized Items | N of Items |
|-----------|------------------|----------------------------------------------|------------|
| Catalunya | ,931             | ,933                                         | 10         |
| Galicia   | ,943             | ,943                                         | 10         |

**Reliability Statistics**

| Study     | Cronbach's Alpha | Cronbach's Alpha Based on Standardized Items | N of Items |
|-----------|------------------|----------------------------------------------|------------|
| Catalunya | ,898             | ,905                                         | 10         |
| Galicia   | ,926             | ,927                                         | 10         |

**Reliability Statistics**

| Study     | Cronbach's Alpha | Cronbach's Alpha Based on Standardized Items | N of Items |
|-----------|------------------|----------------------------------------------|------------|
| Catalunya | ,952             | ,956                                         | 28         |
| Galicia   | ,965             | ,965                                         | 28         |

**Reliability Statistics**

| Study   | Cronbach's Alpha | Cronbach's Alpha Based on Standardized Items | N of Items |
|---------|------------------|----------------------------------------------|------------|
| Galicia | ,932             | ,933                                         | 6          |

**Figure 1**

*Parameters estimates of three factor order (total sample): Mplus instructions*

```
TITLE: CFA CPTI  
DATA: FILE IS CPTI.dat;  
VARIABLE: NAMES ARE id curs sexe cptil-cpti28;  
           USEVARIABLE  cptil-cpti28;  
           CATEGORICAL ARE cptil-cpti28;  
ANALYSIS: ESTIMATOR = WLSMV;  
MODEL: GD BY cpti5 cpti7 cpti9 cpti15 cpti18 cpti21 cpti24 cpti26;  
       CU BY cpti2 cpti4 cpti8 cpti11 cpti13 cpti17 cpti20 cpti22 cpti25 cpti27;  
       INS BY cpti1 cpti3 cpti6 cpti10 cpti12 cpti14 cpti16 cpti19 cpti23 cpti28;  
       PP BY GD CU INS;  
  
savedata:  
  difftest is mydiff.dat;  
  
OUTPUT: STANDARDIZED;
```

UNIVARIATE PROPORTIONS AND COUNTS FOR CATEGORICAL VARIABLES

|            |       |         |
|------------|-------|---------|
| CPTI1      |       |         |
| Category 1 | 0.369 | 134.000 |
| Category 2 | 0.361 | 131.000 |
| Category 3 | 0.212 | 77.000  |
| Category 4 | 0.058 | 21.000  |
| CPTI2      |       |         |
| Category 1 | 0.636 | 231.000 |
| Category 2 | 0.278 | 101.000 |
| Category 3 | 0.069 | 25.000  |
| Category 4 | 0.017 | 6.000   |
| CPTI3      |       |         |
| Category 1 | 0.471 | 171.000 |
| Category 2 | 0.273 | 99.000  |
| Category 3 | 0.179 | 65.000  |
| Category 4 | 0.077 | 28.000  |
| CPTI4      |       |         |
| Category 1 | 0.603 | 219.000 |
| Category 2 | 0.281 | 102.000 |
| Category 3 | 0.088 | 32.000  |
| Category 4 | 0.028 | 10.000  |
| CPTI5      |       |         |
| Category 1 | 0.592 | 215.000 |
| Category 2 | 0.242 | 88.000  |
| Category 3 | 0.118 | 43.000  |
| Category 4 | 0.047 | 17.000  |
| CPTI6      |       |         |
| Category 1 | 0.543 | 197.000 |
| Category 2 | 0.264 | 96.000  |
| Category 3 | 0.152 | 55.000  |
| Category 4 | 0.041 | 15.000  |
| CPTI7      |       |         |
| Category 1 | 0.719 | 261.000 |
| Category 2 | 0.171 | 62.000  |
| Category 3 | 0.091 | 33.000  |
| Category 4 | 0.019 | 7.000   |
| CPTI8      |       |         |
| Category 1 | 0.584 | 212.000 |
| Category 2 | 0.240 | 87.000  |
| Category 3 | 0.129 | 47.000  |
| Category 4 | 0.047 | 17.000  |
| CPTI9      |       |         |
| Category 1 | 0.625 | 227.000 |
| Category 2 | 0.234 | 85.000  |
| Category 3 | 0.091 | 33.000  |
| Category 4 | 0.050 | 18.000  |
| CPTI10     |       |         |
| Category 1 | 0.691 | 251.000 |

|            |       |         |
|------------|-------|---------|
| Category 2 | 0.193 | 70.000  |
| Category 3 | 0.088 | 32.000  |
| Category 4 | 0.028 | 10.000  |
| CPTI11     |       |         |
| Category 1 | 0.614 | 223.000 |
| Category 2 | 0.264 | 96.000  |
| Category 3 | 0.099 | 36.000  |
| Category 4 | 0.022 | 8.000   |
| CPTI12     |       |         |
| Category 1 | 0.405 | 147.000 |
| Category 2 | 0.358 | 130.000 |
| Category 3 | 0.149 | 54.000  |
| Category 4 | 0.088 | 32.000  |
| CPTI13     |       |         |
| Category 1 | 0.694 | 252.000 |
| Category 2 | 0.196 | 71.000  |
| Category 3 | 0.088 | 32.000  |
| Category 4 | 0.022 | 8.000   |
| CPTI14     |       |         |
| Category 1 | 0.645 | 234.000 |
| Category 2 | 0.234 | 85.000  |
| Category 3 | 0.094 | 34.000  |
| Category 4 | 0.028 | 10.000  |
| CPTI15     |       |         |
| Category 1 | 0.691 | 251.000 |
| Category 2 | 0.187 | 68.000  |
| Category 3 | 0.080 | 29.000  |
| Category 4 | 0.041 | 15.000  |
| CPTI16     |       |         |
| Category 1 | 0.601 | 218.000 |
| Category 2 | 0.251 | 91.000  |
| Category 3 | 0.116 | 42.000  |
| Category 4 | 0.033 | 12.000  |
| CPTI17     |       |         |
| Category 1 | 0.601 | 218.000 |
| Category 2 | 0.256 | 93.000  |
| Category 3 | 0.102 | 37.000  |
| Category 4 | 0.041 | 15.000  |
| CPTI18     |       |         |
| Category 1 | 0.680 | 247.000 |
| Category 2 | 0.193 | 70.000  |
| Category 3 | 0.105 | 38.000  |
| Category 4 | 0.022 | 8.000   |
| CPTI19     |       |         |
| Category 1 | 0.446 | 162.000 |
| Category 2 | 0.317 | 115.000 |
| Category 3 | 0.163 | 59.000  |
| Category 4 | 0.074 | 27.000  |
| CPTI20     |       |         |
| Category 1 | 0.584 | 212.000 |
| Category 2 | 0.270 | 98.000  |
| Category 3 | 0.110 | 40.000  |
| Category 4 | 0.036 | 13.000  |
| CPTI21     |       |         |
| Category 1 | 0.697 | 253.000 |
| Category 2 | 0.201 | 73.000  |
| Category 3 | 0.074 | 27.000  |
| Category 4 | 0.028 | 10.000  |
| CPTI22     |       |         |
| Category 1 | 0.664 | 241.000 |
| Category 2 | 0.201 | 73.000  |
| Category 3 | 0.105 | 38.000  |
| Category 4 | 0.030 | 11.000  |
| CPTI23     |       |         |
| Category 1 | 0.499 | 181.000 |
| Category 2 | 0.267 | 97.000  |
| Category 3 | 0.163 | 59.000  |
| Category 4 | 0.072 | 26.000  |
| CPTI24     |       |         |
| Category 1 | 0.716 | 260.000 |
| Category 2 | 0.196 | 71.000  |
| Category 3 | 0.061 | 22.000  |
| Category 4 | 0.028 | 10.000  |
| CPTI25     |       |         |
| Category 1 | 0.598 | 217.000 |
| Category 2 | 0.253 | 92.000  |



|            |       |         |
|------------|-------|---------|
| Category 3 | 0.116 | 42.000  |
| Category 4 | 0.033 | 12.000  |
| CPTI26     |       |         |
| Category 1 | 0.716 | 260.000 |
| Category 2 | 0.190 | 69.000  |
| Category 3 | 0.055 | 20.000  |
| Category 4 | 0.039 | 14.000  |
| CPTI27     |       |         |
| Category 1 | 0.661 | 240.000 |
| Category 2 | 0.204 | 74.000  |
| Category 3 | 0.088 | 32.000  |
| Category 4 | 0.047 | 17.000  |
| CPTI28     |       |         |
| Category 1 | 0.556 | 202.000 |
| Category 2 | 0.256 | 93.000  |
| Category 3 | 0.146 | 53.000  |
| Category 4 | 0.041 | 15.000  |

THE MODEL ESTIMATION TERMINATED NORMALLY

MODEL FIT INFORMATION

Number of Free Parameters 115

Chi-Square Test of Model Fit

|                    |           |
|--------------------|-----------|
| Value              | 1268.195* |
| Degrees of Freedom | 347       |
| P-Value            | 0.0000    |

\* The chi-square value for MLM, MLMV, MLR, ULSMV, WLSM and WLSMV cannot be used for chi-square difference testing in the regular way. MLM, MLR and WLSM chi-square difference testing is described on the Mplus website. MLMV, WLSMV, and ULSMV difference testing is done using the DIFFTEST option.

RMSEA (Root Mean Square Error Of Approximation)

|                          |             |
|--------------------------|-------------|
| Estimate                 | 0.086       |
| 90 Percent C.I.          | 0.080 0.091 |
| Probability RMSEA <= .05 | 0.000       |

CFI/TLI

|     |       |
|-----|-------|
| CFI | 0.975 |
| TLI | 0.972 |

Chi-Square Test of Model Fit for the Baseline Model

|                    |           |
|--------------------|-----------|
| Value              | 36534.365 |
| Degrees of Freedom | 378       |
| P-Value            | 0.0000    |

WRMR (Weighted Root Mean Square Residual)

|       |       |
|-------|-------|
| Value | 1.712 |
|-------|-------|

MODEL RESULTS

|        | Estimate | S.E.  | Est./S.E. | Two-Tailed P-Value |
|--------|----------|-------|-----------|--------------------|
| GD     |          |       |           |                    |
| BY     |          |       |           |                    |
| CPTI5  | 1.000    | 0.000 | 999.000   | 999.000            |
| CPTI7  | 0.938    | 0.020 | 47.330    | 0.000              |
| CPTI9  | 1.019    | 0.010 | 100.904   | 0.000              |
| CPTI15 | 1.035    | 0.010 | 103.627   | 0.000              |
| CPTI18 | 0.987    | 0.016 | 62.488    | 0.000              |
| CPTI21 | 1.004    | 0.014 | 73.589    | 0.000              |
| CPTI24 | 0.955    | 0.021 | 46.085    | 0.000              |
| CPTI26 | 1.027    | 0.012 | 88.140    | 0.000              |

| CU     | BY |       |       |         |         |
|--------|----|-------|-------|---------|---------|
| CPTI2  |    | 1.000 | 0.000 | 999.000 | 999.000 |
| CPTI4  |    | 0.992 | 0.038 | 25.867  | 0.000   |
| CPTI8  |    | 1.133 | 0.044 | 25.566  | 0.000   |
| CPTI11 |    | 1.170 | 0.040 | 29.529  | 0.000   |
| CPTI13 |    | 1.194 | 0.043 | 27.693  | 0.000   |
| CPTI17 |    | 1.193 | 0.046 | 25.944  | 0.000   |
| CPTI20 |    | 1.168 | 0.044 | 26.722  | 0.000   |
| CPTI22 |    | 1.225 | 0.043 | 28.721  | 0.000   |
| CPTI25 |    | 1.195 | 0.043 | 28.090  | 0.000   |
| CPTI27 |    | 1.254 | 0.044 | 28.722  | 0.000   |

| INS    | BY |       |       |         |         |
|--------|----|-------|-------|---------|---------|
| CPTI1  |    | 1.000 | 0.000 | 999.000 | 999.000 |
| CPTI3  |    | 1.285 | 0.065 | 19.829  | 0.000   |
| CPTI6  |    | 1.240 | 0.066 | 18.908  | 0.000   |
| CPTI10 |    | 1.318 | 0.066 | 19.918  | 0.000   |
| CPTI12 |    | 1.340 | 0.072 | 18.729  | 0.000   |
| CPTI14 |    | 1.279 | 0.068 | 18.891  | 0.000   |
| CPTI16 |    | 1.280 | 0.059 | 21.641  | 0.000   |
| CPTI19 |    | 1.311 | 0.068 | 19.197  | 0.000   |
| CPTI23 |    | 1.201 | 0.072 | 16.792  | 0.000   |
| CPTI28 |    | 1.281 | 0.064 | 20.025  | 0.000   |

| CU | WITH |       |       |        |       |
|----|------|-------|-------|--------|-------|
| GD |      | 0.611 | 0.030 | 20.304 | 0.000 |

| INS | WITH |       |       |        |       |
|-----|------|-------|-------|--------|-------|
| GD  |      | 0.471 | 0.035 | 13.619 | 0.000 |
| CU  |      | 0.394 | 0.029 | 13.370 | 0.000 |

| Thresholds |  |        |       |        |       |
|------------|--|--------|-------|--------|-------|
| CPTI1\$1   |  | -0.334 | 0.067 | -4.977 | 0.000 |
| CPTI1\$2   |  | 0.613  | 0.070 | 8.697  | 0.000 |
| CPTI1\$3   |  | 1.573  | 0.106 | 14.861 | 0.000 |
| CPTI2\$1   |  | 0.349  | 0.067 | 5.185  | 0.000 |
| CPTI2\$2   |  | 1.370  | 0.094 | 14.581 | 0.000 |
| CPTI2\$3   |  | 2.131  | 0.163 | 13.109 | 0.000 |
| CPTI3\$1   |  | -0.073 | 0.066 | -1.102 | 0.270 |
| CPTI3\$2   |  | 0.655  | 0.071 | 9.204  | 0.000 |
| CPTI3\$3   |  | 1.425  | 0.097 | 14.712 | 0.000 |
| CPTI4\$1   |  | 0.262  | 0.067 | 3.932  | 0.000 |
| CPTI4\$2   |  | 1.197  | 0.086 | 13.896 | 0.000 |
| CPTI4\$3   |  | 1.918  | 0.136 | 14.153 | 0.000 |
| CPTI5\$1   |  | 0.233  | 0.066 | 3.514  | 0.000 |
| CPTI5\$2   |  | 0.973  | 0.078 | 12.402 | 0.000 |
| CPTI5\$3   |  | 1.676  | 0.113 | 14.796 | 0.000 |
| CPTI6\$1   |  | 0.107  | 0.066 | 1.627  | 0.104 |
| CPTI6\$2   |  | 0.867  | 0.076 | 11.472 | 0.000 |
| CPTI6\$3   |  | 1.736  | 0.118 | 14.699 | 0.000 |
| CPTI7\$1   |  | 0.580  | 0.070 | 8.289  | 0.000 |
| CPTI7\$2   |  | 1.226  | 0.087 | 14.039 | 0.000 |
| CPTI7\$3   |  | 2.069  | 0.154 | 13.454 | 0.000 |
| CPTI8\$1   |  | 0.212  | 0.066 | 3.199  | 0.001 |
| CPTI8\$2   |  | 0.930  | 0.077 | 12.036 | 0.000 |
| CPTI8\$3   |  | 1.676  | 0.113 | 14.796 | 0.000 |
| CPTI9\$1   |  | 0.320  | 0.067 | 4.768  | 0.000 |
| CPTI9\$2   |  | 1.078  | 0.082 | 13.188 | 0.000 |
| CPTI9\$3   |  | 1.649  | 0.111 | 14.826 | 0.000 |
| CPTI10\$1  |  | 0.500  | 0.069 | 7.261  | 0.000 |
| CPTI10\$2  |  | 1.197  | 0.086 | 13.896 | 0.000 |
| CPTI10\$3  |  | 1.918  | 0.136 | 14.153 | 0.000 |
| CPTI11\$1  |  | 0.291  | 0.067 | 4.350  | 0.000 |
| CPTI11\$2  |  | 1.169  | 0.085 | 13.748 | 0.000 |
| CPTI11\$3  |  | 2.013  | 0.147 | 13.734 | 0.000 |
| CPTI12\$1  |  | -0.241 | 0.066 | -3.618 | 0.000 |
| CPTI12\$2  |  | 0.716  | 0.072 | 9.907  | 0.000 |
| CPTI12\$3  |  | 1.352  | 0.093 | 14.530 | 0.000 |
| CPTI13\$1  |  | 0.508  | 0.069 | 7.364  | 0.000 |
| CPTI13\$2  |  | 1.226  | 0.087 | 14.039 | 0.000 |
| CPTI13\$3  |  | 2.013  | 0.147 | 13.734 | 0.000 |
| CPTI14\$1  |  | 0.371  | 0.067 | 5.498  | 0.000 |
| CPTI14\$2  |  | 1.169  | 0.085 | 13.748 | 0.000 |
| CPTI14\$3  |  | 1.918  | 0.136 | 14.153 | 0.000 |
| CPTI15\$1  |  | 0.500  | 0.069 | 7.261  | 0.000 |
| CPTI15\$2  |  | 1.169  | 0.085 | 13.748 | 0.000 |

|           |        |       |        |       |
|-----------|--------|-------|--------|-------|
| CPTI15\$3 | 1.736  | 0.118 | 14.699 | 0.000 |
| CPTI16\$1 | 0.255  | 0.067 | 3.828  | 0.000 |
| CPTI16\$2 | 1.042  | 0.081 | 12.933 | 0.000 |
| CPTI16\$3 | 1.838  | 0.127 | 14.438 | 0.000 |
| CPTI17\$1 | 0.255  | 0.067 | 3.828  | 0.000 |
| CPTI17\$2 | 1.066  | 0.081 | 13.104 | 0.000 |
| CPTI17\$3 | 1.736  | 0.118 | 14.699 | 0.000 |
| CPTI18\$1 | 0.469  | 0.068 | 6.848  | 0.000 |
| CPTI18\$2 | 1.142  | 0.084 | 13.593 | 0.000 |
| CPTI18\$3 | 2.013  | 0.147 | 13.734 | 0.000 |
| CPTI19\$1 | -0.135 | 0.066 | -2.046 | 0.041 |
| CPTI19\$2 | 0.716  | 0.072 | 9.907  | 0.000 |
| CPTI19\$3 | 1.444  | 0.098 | 14.748 | 0.000 |
| CPTI20\$1 | 0.212  | 0.066 | 3.199  | 0.001 |
| CPTI20\$2 | 1.054  | 0.081 | 13.019 | 0.000 |
| CPTI20\$3 | 1.801  | 0.124 | 14.544 | 0.000 |
| CPTI21\$1 | 0.516  | 0.069 | 7.467  | 0.000 |
| CPTI21\$2 | 1.271  | 0.089 | 14.239 | 0.000 |
| CPTI21\$3 | 1.918  | 0.136 | 14.153 | 0.000 |
| CPTI22\$1 | 0.423  | 0.068 | 6.226  | 0.000 |
| CPTI22\$2 | 1.103  | 0.083 | 13.353 | 0.000 |
| CPTI22\$3 | 1.876  | 0.131 | 14.309 | 0.000 |
| CPTI23\$1 | -0.003 | 0.066 | -0.052 | 0.958 |
| CPTI23\$2 | 0.725  | 0.072 | 10.007 | 0.000 |
| CPTI23\$3 | 1.464  | 0.099 | 14.780 | 0.000 |
| CPTI24\$1 | 0.572  | 0.070 | 8.186  | 0.000 |
| CPTI24\$2 | 1.352  | 0.093 | 14.530 | 0.000 |
| CPTI24\$3 | 1.918  | 0.136 | 14.153 | 0.000 |
| CPTI25\$1 | 0.248  | 0.067 | 3.723  | 0.000 |
| CPTI25\$2 | 1.042  | 0.081 | 12.933 | 0.000 |
| CPTI25\$3 | 1.838  | 0.127 | 14.438 | 0.000 |
| CPTI26\$1 | 0.572  | 0.070 | 8.186  | 0.000 |
| CPTI26\$2 | 1.319  | 0.091 | 14.421 | 0.000 |
| CPTI26\$3 | 1.768  | 0.121 | 14.630 | 0.000 |
| CPTI27\$1 | 0.416  | 0.068 | 6.122  | 0.000 |
| CPTI27\$2 | 1.103  | 0.083 | 13.353 | 0.000 |
| CPTI27\$3 | 1.676  | 0.113 | 14.796 | 0.000 |
| CPTI28\$1 | 0.142  | 0.066 | 2.151  | 0.031 |
| CPTI28\$2 | 0.888  | 0.076 | 11.662 | 0.000 |
| CPTI28\$3 | 1.736  | 0.118 | 14.699 | 0.000 |

Variiances

|     |       |       |        |       |
|-----|-------|-------|--------|-------|
| GD  | 0.889 | 0.017 | 52.585 | 0.000 |
| CU  | 0.595 | 0.044 | 13.571 | 0.000 |
| INS | 0.459 | 0.047 | 9.683  | 0.000 |

STANDARDIZED MODEL RESULTS

STDYX Standardization

|    |        | Estimate | S.E.  | Est./S.E. | Two-Tailed<br>P-Value |
|----|--------|----------|-------|-----------|-----------------------|
| GD | BY     |          |       |           |                       |
|    | CPTI5  | 0.943    | 0.009 | 105.170   | 0.000                 |
|    | CPTI7  | 0.884    | 0.017 | 50.980    | 0.000                 |
|    | CPTI9  | 0.961    | 0.008 | 125.954   | 0.000                 |
|    | CPTI15 | 0.976    | 0.006 | 150.421   | 0.000                 |
|    | CPTI18 | 0.930    | 0.013 | 71.325    | 0.000                 |
|    | CPTI21 | 0.947    | 0.012 | 79.157    | 0.000                 |
|    | CPTI24 | 0.901    | 0.018 | 50.003    | 0.000                 |
|    | CPTI26 | 0.969    | 0.008 | 115.981   | 0.000                 |
| CU | BY     |          |       |           |                       |
|    | CPTI2  | 0.771    | 0.028 | 27.142    | 0.000                 |
|    | CPTI4  | 0.765    | 0.030 | 25.736    | 0.000                 |
|    | CPTI8  | 0.874    | 0.019 | 45.704    | 0.000                 |
|    | CPTI11 | 0.903    | 0.016 | 54.764    | 0.000                 |
|    | CPTI13 | 0.921    | 0.015 | 61.631    | 0.000                 |
|    | CPTI17 | 0.920    | 0.015 | 62.285    | 0.000                 |
|    | CPTI20 | 0.901    | 0.017 | 54.352    | 0.000                 |
|    | CPTI22 | 0.945    | 0.010 | 91.834    | 0.000                 |
|    | CPTI25 | 0.922    | 0.013 | 72.757    | 0.000                 |
|    | CPTI27 | 0.967    | 0.009 | 110.872   | 0.000                 |

| INS    | BY |       |       |        |       |
|--------|----|-------|-------|--------|-------|
| CPTI1  |    | 0.678 | 0.035 | 19.367 | 0.000 |
| CPTI3  |    | 0.871 | 0.018 | 48.106 | 0.000 |
| CPTI6  |    | 0.840 | 0.025 | 33.955 | 0.000 |
| CPTI10 |    | 0.893 | 0.021 | 42.729 | 0.000 |
| CPTI12 |    | 0.908 | 0.018 | 51.817 | 0.000 |
| CPTI14 |    | 0.866 | 0.022 | 38.555 | 0.000 |
| CPTI16 |    | 0.867 | 0.019 | 45.274 | 0.000 |
| CPTI19 |    | 0.888 | 0.016 | 54.048 | 0.000 |
| CPTI23 |    | 0.814 | 0.028 | 29.353 | 0.000 |
| CPTI28 |    | 0.868 | 0.018 | 47.149 | 0.000 |

|    |      |       |       |        |       |
|----|------|-------|-------|--------|-------|
| CU | WITH |       |       |        |       |
| GD |      | 0.840 | 0.016 | 53.382 | 0.000 |

|     |      |       |       |        |       |
|-----|------|-------|-------|--------|-------|
| INS | WITH |       |       |        |       |
| GD  |      | 0.738 | 0.029 | 25.325 | 0.000 |
| CU  |      | 0.754 | 0.025 | 30.118 | 0.000 |

| Thresholds |  |        |       |        |       |
|------------|--|--------|-------|--------|-------|
| CPTI1\$1   |  | -0.334 | 0.067 | -4.977 | 0.000 |
| CPTI1\$2   |  | 0.613  | 0.070 | 8.697  | 0.000 |
| CPTI1\$3   |  | 1.573  | 0.106 | 14.861 | 0.000 |
| CPTI2\$1   |  | 0.349  | 0.067 | 5.185  | 0.000 |
| CPTI2\$2   |  | 1.370  | 0.094 | 14.581 | 0.000 |
| CPTI2\$3   |  | 2.131  | 0.163 | 13.109 | 0.000 |
| CPTI3\$1   |  | -0.073 | 0.066 | -1.102 | 0.270 |
| CPTI3\$2   |  | 0.655  | 0.071 | 9.204  | 0.000 |
| CPTI3\$3   |  | 1.425  | 0.097 | 14.712 | 0.000 |
| CPTI4\$1   |  | 0.262  | 0.067 | 3.932  | 0.000 |
| CPTI4\$2   |  | 1.197  | 0.086 | 13.896 | 0.000 |
| CPTI4\$3   |  | 1.918  | 0.136 | 14.153 | 0.000 |
| CPTI5\$1   |  | 0.233  | 0.066 | 3.514  | 0.000 |
| CPTI5\$2   |  | 0.973  | 0.078 | 12.402 | 0.000 |
| CPTI5\$3   |  | 1.676  | 0.113 | 14.796 | 0.000 |
| CPTI6\$1   |  | 0.107  | 0.066 | 1.627  | 0.104 |
| CPTI6\$2   |  | 0.867  | 0.076 | 11.472 | 0.000 |
| CPTI6\$3   |  | 1.736  | 0.118 | 14.699 | 0.000 |
| CPTI7\$1   |  | 0.580  | 0.070 | 8.289  | 0.000 |
| CPTI7\$2   |  | 1.226  | 0.087 | 14.039 | 0.000 |
| CPTI7\$3   |  | 2.069  | 0.154 | 13.454 | 0.000 |
| CPTI8\$1   |  | 0.212  | 0.066 | 3.199  | 0.001 |
| CPTI8\$2   |  | 0.930  | 0.077 | 12.036 | 0.000 |
| CPTI8\$3   |  | 1.676  | 0.113 | 14.796 | 0.000 |
| CPTI9\$1   |  | 0.320  | 0.067 | 4.768  | 0.000 |
| CPTI9\$2   |  | 1.078  | 0.082 | 13.188 | 0.000 |
| CPTI9\$3   |  | 1.649  | 0.111 | 14.826 | 0.000 |
| CPTI10\$1  |  | 0.500  | 0.069 | 7.261  | 0.000 |
| CPTI10\$2  |  | 1.197  | 0.086 | 13.896 | 0.000 |
| CPTI10\$3  |  | 1.918  | 0.136 | 14.153 | 0.000 |
| CPTI11\$1  |  | 0.291  | 0.067 | 4.350  | 0.000 |
| CPTI11\$2  |  | 1.169  | 0.085 | 13.748 | 0.000 |
| CPTI11\$3  |  | 2.013  | 0.147 | 13.734 | 0.000 |
| CPTI12\$1  |  | -0.241 | 0.066 | -3.618 | 0.000 |
| CPTI12\$2  |  | 0.716  | 0.072 | 9.907  | 0.000 |
| CPTI12\$3  |  | 1.352  | 0.093 | 14.530 | 0.000 |
| CPTI13\$1  |  | 0.508  | 0.069 | 7.364  | 0.000 |
| CPTI13\$2  |  | 1.226  | 0.087 | 14.039 | 0.000 |
| CPTI13\$3  |  | 2.013  | 0.147 | 13.734 | 0.000 |
| CPTI14\$1  |  | 0.371  | 0.067 | 5.498  | 0.000 |
| CPTI14\$2  |  | 1.169  | 0.085 | 13.748 | 0.000 |
| CPTI14\$3  |  | 1.918  | 0.136 | 14.153 | 0.000 |
| CPTI15\$1  |  | 0.500  | 0.069 | 7.261  | 0.000 |
| CPTI15\$2  |  | 1.169  | 0.085 | 13.748 | 0.000 |
| CPTI15\$3  |  | 1.736  | 0.118 | 14.699 | 0.000 |
| CPTI16\$1  |  | 0.255  | 0.067 | 3.828  | 0.000 |
| CPTI16\$2  |  | 1.042  | 0.081 | 12.933 | 0.000 |
| CPTI16\$3  |  | 1.838  | 0.127 | 14.438 | 0.000 |
| CPTI17\$1  |  | 0.255  | 0.067 | 3.828  | 0.000 |
| CPTI17\$2  |  | 1.066  | 0.081 | 13.104 | 0.000 |
| CPTI17\$3  |  | 1.736  | 0.118 | 14.699 | 0.000 |
| CPTI18\$1  |  | 0.469  | 0.068 | 6.848  | 0.000 |
| CPTI18\$2  |  | 1.142  | 0.084 | 13.593 | 0.000 |
| CPTI18\$3  |  | 2.013  | 0.147 | 13.734 | 0.000 |
| CPTI19\$1  |  | -0.135 | 0.066 | -2.046 | 0.041 |

|           |        |       |        |       |
|-----------|--------|-------|--------|-------|
| CPTI19\$2 | 0.716  | 0.072 | 9.907  | 0.000 |
| CPTI19\$3 | 1.444  | 0.098 | 14.748 | 0.000 |
| CPTI20\$1 | 0.212  | 0.066 | 3.199  | 0.001 |
| CPTI20\$2 | 1.054  | 0.081 | 13.019 | 0.000 |
| CPTI20\$3 | 1.801  | 0.124 | 14.544 | 0.000 |
| CPTI21\$1 | 0.516  | 0.069 | 7.467  | 0.000 |
| CPTI21\$2 | 1.271  | 0.089 | 14.239 | 0.000 |
| CPTI21\$3 | 1.918  | 0.136 | 14.153 | 0.000 |
| CPTI22\$1 | 0.423  | 0.068 | 6.226  | 0.000 |
| CPTI22\$2 | 1.103  | 0.083 | 13.353 | 0.000 |
| CPTI22\$3 | 1.876  | 0.131 | 14.309 | 0.000 |
| CPTI23\$1 | -0.003 | 0.066 | -0.052 | 0.958 |
| CPTI23\$2 | 0.725  | 0.072 | 10.007 | 0.000 |
| CPTI23\$3 | 1.464  | 0.099 | 14.780 | 0.000 |
| CPTI24\$1 | 0.572  | 0.070 | 8.186  | 0.000 |
| CPTI24\$2 | 1.352  | 0.093 | 14.530 | 0.000 |
| CPTI24\$3 | 1.918  | 0.136 | 14.153 | 0.000 |
| CPTI25\$1 | 0.248  | 0.067 | 3.723  | 0.000 |
| CPTI25\$2 | 1.042  | 0.081 | 12.933 | 0.000 |
| CPTI25\$3 | 1.838  | 0.127 | 14.438 | 0.000 |
| CPTI26\$1 | 0.572  | 0.070 | 8.186  | 0.000 |
| CPTI26\$2 | 1.319  | 0.091 | 14.421 | 0.000 |
| CPTI26\$3 | 1.768  | 0.121 | 14.630 | 0.000 |
| CPTI27\$1 | 0.416  | 0.068 | 6.122  | 0.000 |
| CPTI27\$2 | 1.103  | 0.083 | 13.353 | 0.000 |
| CPTI27\$3 | 1.676  | 0.113 | 14.796 | 0.000 |
| CPTI28\$1 | 0.142  | 0.066 | 2.151  | 0.031 |
| CPTI28\$2 | 0.888  | 0.076 | 11.662 | 0.000 |
| CPTI28\$3 | 1.736  | 0.118 | 14.699 | 0.000 |

Variiances

|     |       |       |         |         |
|-----|-------|-------|---------|---------|
| GD  | 1.000 | 0.000 | 999.000 | 999.000 |
| CU  | 1.000 | 0.000 | 999.000 | 999.000 |
| INS | 1.000 | 0.000 | 999.000 | 999.000 |

R-SQUARE

| Observed Variable | Estimate | S.E.  | Est./S.E. | Two-Tailed P-Value | Residual Variance |
|-------------------|----------|-------|-----------|--------------------|-------------------|
| CPTI1             | 0.459    | 0.047 | 9.683     | 0.000              | 0.541             |
| CPTI2             | 0.595    | 0.044 | 13.571    | 0.000              | 0.405             |
| CPTI3             | 0.759    | 0.032 | 24.053    | 0.000              | 0.241             |
| CPTI4             | 0.586    | 0.046 | 12.868    | 0.000              | 0.414             |
| CPTI5             | 0.889    | 0.017 | 52.585    | 0.000              | 0.111             |
| CPTI6             | 0.706    | 0.042 | 16.978    | 0.000              | 0.294             |
| CPTI7             | 0.782    | 0.031 | 25.490    | 0.000              | 0.218             |
| CPTI8             | 0.765    | 0.033 | 22.852    | 0.000              | 0.235             |
| CPTI9             | 0.923    | 0.015 | 62.977    | 0.000              | 0.077             |
| CPTI10            | 0.798    | 0.037 | 21.364    | 0.000              | 0.202             |
| CPTI11            | 0.815    | 0.030 | 27.382    | 0.000              | 0.185             |
| CPTI12            | 0.824    | 0.032 | 25.909    | 0.000              | 0.176             |
| CPTI13            | 0.848    | 0.028 | 30.815    | 0.000              | 0.152             |
| CPTI14            | 0.751    | 0.039 | 19.278    | 0.000              | 0.249             |
| CPTI15            | 0.952    | 0.013 | 75.211    | 0.000              | 0.048             |
| CPTI16            | 0.752    | 0.033 | 22.637    | 0.000              | 0.248             |
| CPTI17            | 0.846    | 0.027 | 31.142    | 0.000              | 0.154             |
| CPTI18            | 0.866    | 0.024 | 35.662    | 0.000              | 0.134             |
| CPTI19            | 0.789    | 0.029 | 27.024    | 0.000              | 0.211             |
| CPTI20            | 0.813    | 0.030 | 27.176    | 0.000              | 0.187             |
| CPTI21            | 0.896    | 0.023 | 39.579    | 0.000              | 0.104             |
| CPTI22            | 0.894    | 0.019 | 45.917    | 0.000              | 0.106             |
| CPTI23            | 0.662    | 0.045 | 14.676    | 0.000              | 0.338             |
| CPTI24            | 0.811    | 0.032 | 25.002    | 0.000              | 0.189             |
| CPTI25            | 0.851    | 0.023 | 36.379    | 0.000              | 0.149             |
| CPTI26            | 0.938    | 0.016 | 57.990    | 0.000              | 0.062             |
| CPTI27            | 0.935    | 0.017 | 55.436    | 0.000              | 0.065             |
| CPTI28            | 0.754    | 0.032 | 23.575    | 0.000              | 0.246             |

## Others CFA Models and Invariance

```
DATA: FILE IS CPTI.dat;

VARIABLE: NAMES ARE id curs sexe cptil-cpti28;
          USEOBSERVATIONS ARE sexe==1;
          USEVARIABLE cptil-cpti28;
          CATEGORICAL ARE cptil-cpti28;

ANALYSIS: ESTIMATOR = WLSMV;

MODEL: GD BY cpti5 cpti7 cpti9 cpti15 cpti18 cpti21 cpti24 cpti26;
       CU BY cpti2 cpti4 cpti8 cpti11 cpti13 cpti17 cpti20 cpti22 cpti25 cpti27;
       INS BY cpti1 cpti3 cpti6 cpti10 cpti12 cpti14 cpti16 cpti19 cpti23 cpti28;

Analysis:
  difftest is diffnens.dat;

OUTPUT: STANDARDIZED;

TITLE: CFA CPTI: Invariance

DATA: FILE IS CPTI.dat;

VARIABLE: NAMES ARE id curs sexe cptil-cpti28;
          USEVARIABLE sexe cptil-cpti28;
          CATEGORICAL ARE cptil-cpti28;
          GROUPING IS sexe (0=male 1=female);

ANALYSIS: ESTIMATOR = WLSMV;
          PARAMETERIZATION = THETA; DIFFTEST IS conf.dat;

MODEL: GD BY cpti5* cpti7 cpti9 cpti15 cpti18 cpti21 cpti24 cpti26;
       CU BY cpti2* cpti4 cpti8 cpti11 cpti13 cpti17 cpti20 cpti22 cpti25 cpti27;
       INS BY cpti1* cpti3 cpti6 cpti10 cpti12 cpti14 cpti16 cpti19 cpti23 cpti28;
       GD@1; CU@1; INS@1;
       [cpti1$1]; [cpti1$2]; [cpti2$1]; [cpti2$2]; [cpti3$1]; [cpti3$2];
       [cpti4$1]; [cpti4$2]; [cpti5$1]; [cpti5$2]; [cpti6$1]; [cpti6$2];
       [cpti7$1]; [cpti7$2]; [cpti8$1]; [cpti8$2]; [cpti9$1]; [cpti9$2];
       [cpti10$1]; [cpti10$2]; [cpti11$1]; [cpti11$2]; [cpti12$1]; [cpti12$2];
       [cpti13$1]; [cpti13$2]; [cpti14$1]; [cpti14$2]; [cpti15$1]; [cpti15$2];
       [cpti16$1]; [cpti16$2]; [cpti17$1]; [cpti17$2]; [cpti18$1]; [cpti18$2];
       [cpti19$1]; [cpti19$2]; [cpti20$1]; [cpti20$2]; [cpti21$1]; [cpti21$2];
       [cpti22$1]; [cpti22$2]; [cpti23$1]; [cpti23$2]; [cpti24$1]; [cpti24$2];
       [cpti25$1]; [cpti25$2]; [cpti26$1]; [cpti26$2];
       [cpti27$1]; [cpti27$2]; [cpti28$1]; [cpti28$2];
       [GD@0]; [CU@0]; [INS@0];

MODEL female:
  !GD BY cpti5* cpti7 cpti9 cpti15 cpti18 cpti21 cpti24 cpti26;
  !CU BY cpti2* cpti4 cpti8 cpti11 cpti13 cpti17 cpti20 cpti22 cpti25 cpti27;
  !INS BY cpti1* cpti3 cpti6 cpti10 cpti12 cpti14 cpti16 cpti19 cpti23 cpti28;
  GD*; CU*; INS*;
  [cpti1$1]; [cpti1$2]; [cpti2$1]; [cpti2$2]; [cpti3$1]; [cpti3$2];
  [cpti4$1]; [cpti4$2]; [cpti5$1]; [cpti5$2]; [cpti6$1]; [cpti6$2];
  [cpti7$1]; [cpti7$2]; [cpti8$1]; [cpti8$2]; [cpti9$1]; [cpti9$2];
  [cpti10$1]; [cpti10$2]; [cpti11$1]; [cpti11$2]; [cpti12$1]; [cpti12$2];
  [cpti13$1]; [cpti13$2]; [cpti14$1]; [cpti14$2]; [cpti15$1]; [cpti15$2];
  [cpti16$1]; [cpti16$2]; [cpti17$1]; [cpti17$2]; [cpti18$1]; [cpti18$2];
  [cpti19$1]; [cpti19$2]; [cpti20$1]; [cpti20$2]; [cpti21$1]; [cpti21$2];
  [cpti22$1]; [cpti22$2]; [cpti23$1]; [cpti23$2]; [cpti24$1]; [cpti24$2];
  [cpti25$1]; [cpti25$2]; [cpti26$1]; [cpti26$2];
  [cpti27$1]; [cpti27$2]; [cpti28$1]; [cpti28$2];
  [GD@0]; [CU@0]; [INS@0];
  cpti7@1; cpti9@1; cpti15@1; cpti18@1; cpti21@1; cpti24@1; cpti26@1;
  cpti2@1; cpti4@1; cpti8@1; cpti11@1; cpti13@1; cpti17@1; cpti20@1;
  cpti22@1; cpti25@1; cpti27@1; cpti1@1; cpti3@1; cpti6@1; cpti10@1;
  cpti12@1; cpti14@1; cpti16@1; cpti19@1; cpti23@1; cpti28@1;

OUTPUT: STANDARDIZED; ;
SAVEDATA: DIFFTEST IS load.dat;
```

TITLE: CFA CPTI: Configural Invariance  
DATA: FILE IS CPTI.dat;

VARIABLE: NAMES ARE id curs sexe cptil-cpti28;  
USEVARIABLE sexe cptil-cpti28;  
CATEGORICAL ARE cptil-cpti28;  
GROUPING IS sexe (0=male 1=female);  
MISSING curs sexe (-9);

ANALYSIS: ESTIMATOR = WLSMV;  
PARAMETERIZATION = THETA;  
MODEL IS CONFIGURAL METRIC;

MODEL: GD BY cpti5 cpti7 cpti9 cpti15 cpti18 cpti21 cpti24 cpti26;  
CU BY cpti2 cpti4 cpti8 cpti11 cpti13 cpti17 cpti20 cpti22 cpti25 cpti27;  
INS BY cpti1 cpti3 cpti6 cpti10 cpti12 cpti14 cpti16 cpti19 cpti23 cpti28;

TITLE: CFA CPTI: Configural Invariance

DATA: FILE IS CPTI.dat;

VARIABLE: NAMES ARE id curs sexe cptil-cpti28;  
USEVARIABLE sexe cptil-cpti28;  
CATEGORICAL ARE cptil-cpti28;  
GROUPING IS sexe (0=male 1=female);  
MISSING curs sexe (-9);

ANALYSIS: ESTIMATOR = WLSMV;  
PARAMETERIZATION = THETA;

MODEL: GD BY cpti5\* cpti7 cpti9 cpti15 cpti18 cpti21 cpti24 cpti26;  
CU BY cpti2\* cpti4 cpti8 cpti11 cpti13 cpti17 cpti20 cpti22 cpti25 cpti27;  
INS BY cpti1\* cpti3 cpti6 cpti10 cpti12 cpti14 cpti16 cpti19 cpti23 cpti28;  
GD@1; CU@1; INS@1;  
[cpti1\$1]; [cpti1\$2]; [cpti2\$1]; [cpti2\$2]; [cpti3\$1]; [cpti3\$2];  
[cpti4\$1]; [cpti4\$2]; [cpti5\$1]; [cpti5\$2]; [cpti6\$1]; [cpti6\$2];  
[cpti7\$1]; [cpti7\$2]; [cpti8\$1]; [cpti8\$2]; [cpti9\$1]; [cpti9\$2];  
[cpti10\$1]; [cpti10\$2]; [cpti11\$1]; [cpti11\$2]; [cpti12\$1]; [cpti12\$2];  
[cpti13\$1]; [cpti13\$2]; [cpti14\$1]; [cpti14\$2]; [cpti15\$1]; [cpti15\$2];  
[cpti16\$1]; [cpti16\$2]; [cpti17\$1]; [cpti17\$2]; [cpti18\$1]; [cpti18\$2];  
[cpti19\$1]; [cpti19\$2]; [cpti20\$1]; [cpti20\$2]; [cpti21\$1]; [cpti21\$2];  
[cpti22\$1]; [cpti22\$2]; [cpti23\$1]; [cpti23\$2]; [cpti24\$1]; [cpti24\$2];  
[cpti25\$1]; [cpti25\$2]; [cpti26\$1]; [cpti26\$2];  
[cpti27\$1]; [cpti27\$2]; [cpti28\$1]; [cpti28\$2];  
[GD@0]; [CU@0]; [INS@0];

MODEL female:

GD BY cpti5\* cpti7 cpti9 cpti15 cpti18 cpti21 cpti24 cpti26;  
CU BY cpti2\* cpti4 cpti8 cpti11 cpti13 cpti17 cpti20 cpti22 cpti25 cpti27;  
INS BY cpti1\* cpti3 cpti6 cpti10 cpti12 cpti14 cpti16 cpti19 cpti23 cpti28;  
GD@1; CU@1; INS@1;  
[cpti1\$1]; [cpti1\$2]; [cpti2\$1]; [cpti2\$2]; [cpti3\$1]; [cpti3\$2];  
[cpti4\$1]; [cpti4\$2]; [cpti5\$1]; [cpti5\$2]; [cpti6\$1]; [cpti6\$2];  
[cpti7\$1]; [cpti7\$2]; [cpti8\$1]; [cpti8\$2]; [cpti9\$1]; [cpti9\$2];  
[cpti10\$1]; [cpti10\$2]; [cpti11\$1]; [cpti11\$2]; [cpti12\$1]; [cpti12\$2];  
[cpti13\$1]; [cpti13\$2]; [cpti14\$1]; [cpti14\$2]; [cpti15\$1]; [cpti15\$2];  
[cpti16\$1]; [cpti16\$2]; [cpti17\$1]; [cpti17\$2]; [cpti18\$1]; [cpti18\$2];  
[cpti19\$1]; [cpti19\$2]; [cpti20\$1]; [cpti20\$2]; [cpti21\$1]; [cpti21\$2];  
[cpti22\$1]; [cpti22\$2]; [cpti23\$1]; [cpti23\$2]; [cpti24\$1]; [cpti24\$2];  
[cpti25\$1]; [cpti25\$2]; [cpti26\$1]; [cpti26\$2];  
[cpti27\$1]; [cpti27\$2]; [cpti28\$1]; [cpti28\$2];  
[GD@0]; [CU@0]; [INS@0];

OUTPUT: STANDARDIZED; SAMPSTAT; PATTERNS;  
SAVEDATA: DIFFTEST IS conf.dat;

INPUT INSTRUCTIONS

TITLE: CFA CPTI: Scalar Invariance

DATA: FILE IS CPTI.dat;

VARIABLE: NAMES ARE id curs sexe cpti1-cpti28;  
USEVARIABLE sexe cpti1-cpti28;  
CATEGORICAL ARE cpti1-cpti28;  
GROUPING IS sexe (0=male 1=female);  
MISSING curs sexe (-9);

ANALYSIS: ESTIMATOR = WLSMV;  
PARAMETERIZATION = THETA; DIFFTEST IS conf.dat;

MODEL: GD BY cpti5\* cpti7 cpti9 cpti15 cpti18 cpti21 cpti24 cpti26;  
CU BY cpti2\* cpti4 cpti8 cpti11 cpti13 cpti17 cpti20 cpti22 cpti25 cpti27;  
INS BY cpti1\* cpti3 cpti6 cpti10 cpti12 cpti14 cpti16 cpti19 cpti23 cpti28;  
GD@1; CU@1; INS@1;  
[cpti1\$1]; [cpti1\$2]; [cpti2\$1]; [cpti2\$2]; [cpti3\$1]; [cpti3\$2];  
[cpti4\$1]; [cpti4\$2]; [cpti5\$1]; [cpti5\$2]; [cpti6\$1]; [cpti6\$2];  
[cpti7\$1]; [cpti7\$2]; [cpti8\$1]; [cpti8\$2]; [cpti9\$1]; [cpti9\$2];  
[cpti10\$1]; [cpti10\$2]; [cpti11\$1]; [cpti11\$2]; [cpti12\$1]; [cpti12\$2];  
[cpti13\$1]; [cpti13\$2]; [cpti14\$1]; [cpti14\$2]; [cpti15\$1]; [cpti15\$2];  
[cpti16\$1]; [cpti16\$2]; [cpti17\$1]; [cpti17\$2]; [cpti18\$1]; [cpti18\$2];  
[cpti19\$1]; [cpti19\$2]; [cpti20\$1]; [cpti20\$2]; [cpti21\$1]; [cpti21\$2];  
[cpti22\$1]; [cpti22\$2]; [cpti23\$1]; [cpti23\$2]; [cpti24\$1]; [cpti24\$2];  
[cpti25\$1]; [cpti25\$2]; [cpti26\$1]; [cpti26\$2];  
[cpti27\$1]; [cpti27\$2]; [cpti28\$1]; [cpti28\$2];  
[GD@0]; [CU@0]; [INS@0];

MODEL female:

! GD BY cpti5\* cpti7 cpti9 cpti15 cpti18 cpti21 cpti24 cpti26;  
! CU BY cpti2\* cpti4 cpti8 cpti11 cpti13 cpti17 cpti20 cpti22 cpti25 cpti27;  
! INS BY cpti1\* cpti3 cpti6 cpti10 cpti12 cpti14 cpti16 cpti19 cpti23 cpti28;  
GD\*; CU\*; INS\*;  
[cpti1\$1]; [cpti1\$2]; [cpti2\$1]; [cpti2\$2]; [cpti3\$1]; [cpti3\$2];  
[cpti4\$1]; [cpti4\$2]; [cpti5\$1]; [cpti5\$2]; [cpti6\$1]; [cpti6\$2];  
[cpti7\$1]; [cpti7\$2]; [cpti8\$1]; [cpti8\$2]; [cpti9\$1]; [cpti9\$2];  
[cpti10\$1]; [cpti10\$2]; [cpti11\$1]; [cpti11\$2]; [cpti12\$1]; [cpti12\$2];  
[cpti13\$1]; [cpti13\$2]; [cpti14\$1]; [cpti14\$2]; [cpti15\$1]; [cpti15\$2];  
[cpti16\$1]; [cpti16\$2]; [cpti17\$1]; [cpti17\$2]; [cpti18\$1]; [cpti18\$2];  
[cpti19\$1]; [cpti19\$2]; [cpti20\$1]; [cpti20\$2]; [cpti21\$1]; [cpti21\$2];  
[cpti22\$1]; [cpti22\$2]; [cpti23\$1]; [cpti23\$2]; [cpti24\$1]; [cpti24\$2];  
[cpti25\$1]; [cpti25\$2]; [cpti26\$1]; [cpti26\$2];  
[cpti27\$1]; [cpti27\$2]; [cpti28\$1]; [cpti28\$2];  
[GD@0]; [CU@0]; [INS@0];

cpti5@1; cpti7@1; cpti9@1; cpti15@1; cpti18@1; cpti21@1; cpti24@1; cpti26@1;  
cpti2@1; cpti4@1; cpti8@1; cpti11@1; cpti13@1; cpti17@1; cpti20@1; cpti22@1;  
cpti25@1; cpti27@1;  
cpti1@1; cpti3@1; cpti6@1; cpti10@1; cpti12@1; cpti14@1; cpti16@1; cpti19@1;  
cpti23@1; cpti28@1;

OUTPUT: STANDARDIZED;  
SAVEDATA: DIFFTEST IS load.dat;

INPUT READING TERMINATED NORMALLY

CFA CPTI: Configural Invariance

SUMMARY OF ANALYSIS

|                                       |     |
|---------------------------------------|-----|
| Number of groups                      | 2   |
| Number of observations                |     |
| Group PETITS                          | 214 |
| Group GRANS                           | 529 |
| Total sample size                     | 743 |
| Number of dependent variables         | 28  |
| Number of independent variables       | 0   |
| Number of continuous latent variables | 3   |



Observed dependent variables

Binary and ordered categorical (ordinal)

|        |        |        |        |        |        |
|--------|--------|--------|--------|--------|--------|
| CPTI1  | CPTI2  | CPTI3  | CPTI4  | CPTI5  | CPTI6  |
| CPTI7  | CPTI8  | CPTI9  | CPTI10 | CPTI11 | CPTI12 |
| CPTI13 | CPTI14 | CPTI15 | CPTI16 | CPTI17 | CPTI18 |
| CPTI19 | CPTI20 | CPTI21 | CPTI22 | CPTI23 | CPTI24 |
| CPTI25 | CPTI26 | CPTI27 | CPTI28 |        |        |

Continuous latent variables

|    |    |     |
|----|----|-----|
| GD | CU | INS |
|----|----|-----|

Variables with special functions

|                   |      |
|-------------------|------|
| Grouping variable | CURS |
|-------------------|------|

|                                               |           |
|-----------------------------------------------|-----------|
| Estimator                                     | WLSMV     |
| Maximum number of iterations                  | 1000      |
| Convergence criterion                         | 0.500D-04 |
| Maximum number of steepest descent iterations | 20        |
| Maximum number of iterations for H1           | 2000      |
| Convergence criterion for H1                  | 0.100D-03 |
| Parameterization                              | THETA     |

Input data file(s)

CPTI.dat

Input data format FREE

SUMMARY OF DATA

|                                 |   |
|---------------------------------|---|
| Group PETITS                    |   |
| Number of missing data patterns | 1 |
| Group GRANS                     |   |
| Number of missing data patterns | 1 |

COVARIANCE COVERAGE OF DATA

Minimum covariance coverage value 0.100

MODEL FIT INFORMATION

Number of Free Parameters 152

Chi-Square Test of Model Fit

|                    |           |
|--------------------|-----------|
| Value              | 2471.017* |
| Degrees of Freedom | 772       |
| P-Value            | 0.0000    |

Chi-Square Contribution From Each Group

|        |          |
|--------|----------|
| PETITS | 1128.063 |
| GRANS  | 1342.954 |

\* The chi-square value for MLM, MLMV, MLR, ULSMV, WLSM and WLSMV cannot be used for chi-square difference testing in the regular way. MLM, MLR and WLSM chi-square difference testing is described on the Mplus website. MLMV, WLSMV, and ULSMV difference testing is done using the DIFFTEST option.

RMSEA (Root Mean Square Error Of Approximation)

|                          |             |
|--------------------------|-------------|
| Estimate                 | 0.077       |
| 90 Percent C.I.          | 0.074 0.080 |
| Probability RMSEA <= .05 | 0.000       |

CFI/TLI

|     |       |
|-----|-------|
| CFI | 0.973 |
| TLI | 0.974 |

Chi-Square Test of Model Fit for the Baseline Model

Value 64374.820  
 Degrees of Freedom 756  
 P-Value 0.0000

WRMR (Weighted Root Mean Square Residual)

Value 2.442

MODEL RESULTS

|              |          | Estimate | S.E.  | Est./S.E. | Two-Tailed<br>P-Value |
|--------------|----------|----------|-------|-----------|-----------------------|
| Group PETITS |          |          |       |           |                       |
| GD           | BY       |          |       |           |                       |
|              | CPTI5    | 2.667    | 0.306 | 8.730     | 0.000                 |
|              | CPTI7    | 1.601    | 0.196 | 8.152     | 0.000                 |
|              | CPTI9    | 2.790    | 0.389 | 7.174     | 0.000                 |
|              | CPTI15   | 4.073    | 0.919 | 4.430     | 0.000                 |
|              | CPTI18   | 1.936    | 0.252 | 7.692     | 0.000                 |
|              | CPTI21   | 2.332    | 0.349 | 6.680     | 0.000                 |
|              | CPTI24   | 1.325    | 0.157 | 8.456     | 0.000                 |
|              | CPTI26   | 4.425    | 1.235 | 3.582     | 0.000                 |
| CU           | BY       |          |       |           |                       |
|              | CPTI2    | 0.945    | 0.111 | 8.524     | 0.000                 |
|              | CPTI4    | 1.067    | 0.120 | 8.857     | 0.000                 |
|              | CPTI8    | 1.218    | 0.134 | 9.072     | 0.000                 |
|              | CPTI11   | 1.913    | 0.216 | 8.845     | 0.000                 |
|              | CPTI13   | 2.722    | 0.475 | 5.724     | 0.000                 |
|              | CPTI17   | 2.295    | 0.335 | 6.845     | 0.000                 |
|              | CPTI20   | 2.037    | 0.246 | 8.291     | 0.000                 |
|              | CPTI22   | 2.653    | 0.348 | 7.622     | 0.000                 |
|              | CPTI25   | 1.941    | 0.206 | 9.430     | 0.000                 |
|              | CPTI27   | 2.889    | 0.455 | 6.353     | 0.000                 |
| INS          | BY       |          |       |           |                       |
|              | CPTI1    | 0.553    | 0.076 | 7.232     | 0.000                 |
|              | CPTI3    | 1.344    | 0.137 | 9.777     | 0.000                 |
|              | CPTI6    | 1.343    | 0.143 | 9.384     | 0.000                 |
|              | CPTI10   | 1.829    | 0.252 | 7.245     | 0.000                 |
|              | CPTI12   | 2.446    | 0.410 | 5.965     | 0.000                 |
|              | CPTI14   | 1.771    | 0.239 | 7.401     | 0.000                 |
|              | CPTI16   | 1.545    | 0.180 | 8.598     | 0.000                 |
|              | CPTI19   | 1.623    | 0.166 | 9.769     | 0.000                 |
|              | CPTI23   | 1.437    | 0.180 | 7.966     | 0.000                 |
|              | CPTI28   | 1.804    | 0.186 | 9.680     | 0.000                 |
| CU           | WITH     |          |       |           |                       |
|              | GD       | 0.818    | 0.023 | 34.901    | 0.000                 |
| INS          | WITH     |          |       |           |                       |
|              | GD       | 0.734    | 0.038 | 19.334    | 0.000                 |
|              | CU       | 0.789    | 0.028 | 27.743    | 0.000                 |
| Means        |          |          |       |           |                       |
|              | GD       | 0.000    | 0.000 | 999.000   | 999.000               |
|              | CU       | 0.000    | 0.000 | 999.000   | 999.000               |
|              | INS      | 0.000    | 0.000 | 999.000   | 999.000               |
| Thresholds   |          |          |       |           |                       |
|              | CPTI1\$1 | -0.490   | 0.075 | -6.492    | 0.000                 |
|              | CPTI1\$2 | 0.424    | 0.074 | 5.730     | 0.000                 |
|              | CPTI1\$3 | 1.476    | 0.154 | 9.590     | 0.000                 |
|              | CPTI2\$1 | 0.432    | 0.099 | 4.370     | 0.000                 |
|              | CPTI2\$2 | 1.739    | 0.169 | 10.275    | 0.000                 |
|              | CPTI2\$3 | 2.821    | 0.258 | 10.948    | 0.000                 |
|              | CPTI3\$1 | -0.372   | 0.122 | -3.060    | 0.002                 |
|              | CPTI3\$2 | 0.999    | 0.141 | 7.068     | 0.000                 |
|              | CPTI3\$3 | 2.311    | 0.220 | 10.524    | 0.000                 |
|              | CPTI4\$1 | 0.418    | 0.108 | 3.872     | 0.000                 |
|              | CPTI4\$2 | 1.784    | 0.177 | 10.081    | 0.000                 |

|           |        |       |         |         |
|-----------|--------|-------|---------|---------|
| CPTI4\$3  | 2.783  | 0.253 | 10.982  | 0.000   |
| CPTI5\$1  | 0.944  | 0.262 | 3.607   | 0.000   |
| CPTI5\$2  | 3.476  | 0.411 | 8.454   | 0.000   |
| CPTI5\$3  | 5.662  | 0.657 | 8.621   | 0.000   |
| CPTI6\$1  | 0.056  | 0.119 | 0.466   | 0.641   |
| CPTI6\$2  | 1.470  | 0.164 | 8.956   | 0.000   |
| CPTI6\$3  | 3.033  | 0.240 | 12.644  | 0.000   |
| CPTI7\$1  | 1.307  | 0.203 | 6.453   | 0.000   |
| CPTI7\$2  | 2.824  | 0.326 | 8.659   | 0.000   |
| CPTI7\$3  | 4.190  | 0.448 | 9.352   | 0.000   |
| CPTI8\$1  | 0.333  | 0.120 | 2.765   | 0.006   |
| CPTI8\$2  | 1.375  | 0.156 | 8.817   | 0.000   |
| CPTI8\$3  | 2.400  | 0.216 | 11.108  | 0.000   |
| CPTI9\$1  | 1.361  | 0.313 | 4.351   | 0.000   |
| CPTI9\$2  | 3.724  | 0.517 | 7.202   | 0.000   |
| CPTI9\$3  | 5.877  | 0.781 | 7.524   | 0.000   |
| CPTI10\$1 | 0.693  | 0.181 | 3.827   | 0.000   |
| CPTI10\$2 | 2.400  | 0.306 | 7.830   | 0.000   |
| CPTI10\$3 | 3.955  | 0.460 | 8.599   | 0.000   |
| CPTI11\$1 | 0.712  | 0.186 | 3.830   | 0.000   |
| CPTI11\$2 | 2.577  | 0.271 | 9.500   | 0.000   |
| CPTI11\$3 | 4.584  | 0.388 | 11.825  | 0.000   |
| CPTI12\$1 | -0.795 | 0.224 | -3.555  | 0.000   |
| CPTI12\$2 | 1.908  | 0.339 | 5.634   | 0.000   |
| CPTI12\$3 | 4.140  | 0.562 | 7.369   | 0.000   |
| CPTI13\$1 | 1.514  | 0.353 | 4.288   | 0.000   |
| CPTI13\$2 | 3.696  | 0.593 | 6.237   | 0.000   |
| CPTI13\$3 | 6.289  | 0.910 | 6.913   | 0.000   |
| CPTI14\$1 | 0.470  | 0.164 | 2.868   | 0.004   |
| CPTI14\$2 | 2.409  | 0.292 | 8.261   | 0.000   |
| CPTI14\$3 | 4.071  | 0.429 | 9.488   | 0.000   |
| CPTI15\$1 | 2.781  | 0.739 | 3.763   | 0.000   |
| CPTI15\$2 | 5.884  | 1.278 | 4.604   | 0.000   |
| CPTI15\$3 | 8.562  | 1.844 | 4.644   | 0.000   |
| CPTI16\$1 | 0.246  | 0.137 | 1.792   | 0.073   |
| CPTI16\$2 | 1.857  | 0.207 | 8.959   | 0.000   |
| CPTI16\$3 | 3.514  | 0.353 | 9.965   | 0.000   |
| CPTI17\$1 | 0.728  | 0.231 | 3.149   | 0.002   |
| CPTI17\$2 | 2.661  | 0.398 | 6.688   | 0.000   |
| CPTI17\$3 | 4.442  | 0.551 | 8.065   | 0.000   |
| CPTI18\$1 | 1.298  | 0.239 | 5.433   | 0.000   |
| CPTI18\$2 | 2.947  | 0.351 | 8.396   | 0.000   |
| CPTI18\$3 | 5.017  | 0.561 | 8.945   | 0.000   |
| CPTI19\$1 | -0.575 | 0.145 | -3.954  | 0.000   |
| CPTI19\$2 | 1.172  | 0.161 | 7.276   | 0.000   |
| CPTI19\$3 | 2.726  | 0.241 | 11.319  | 0.000   |
| CPTI20\$1 | 0.517  | 0.193 | 2.680   | 0.007   |
| CPTI20\$2 | 2.391  | 0.290 | 8.252   | 0.000   |
| CPTI20\$3 | 4.428  | 0.456 | 9.713   | 0.000   |
| CPTI21\$1 | 1.459  | 0.294 | 4.958   | 0.000   |
| CPTI21\$2 | 3.724  | 0.505 | 7.370   | 0.000   |
| CPTI21\$3 | 5.428  | 0.720 | 7.537   | 0.000   |
| CPTI22\$1 | 1.191  | 0.287 | 4.158   | 0.000   |
| CPTI22\$2 | 3.262  | 0.402 | 8.113   | 0.000   |
| CPTI22\$3 | 5.472  | 0.573 | 9.554   | 0.000   |
| CPTI23\$1 | -0.116 | 0.124 | -0.935  | 0.350   |
| CPTI23\$2 | 1.406  | 0.203 | 6.932   | 0.000   |
| CPTI23\$3 | 2.785  | 0.342 | 8.143   | 0.000   |
| CPTI24\$1 | 1.110  | 0.171 | 6.479   | 0.000   |
| CPTI24\$2 | 2.472  | 0.275 | 8.975   | 0.000   |
| CPTI24\$3 | 3.448  | 0.357 | 9.663   | 0.000   |
| CPTI25\$1 | 0.579  | 0.183 | 3.163   | 0.002   |
| CPTI25\$2 | 2.325  | 0.243 | 9.559   | 0.000   |
| CPTI25\$3 | 4.165  | 0.359 | 11.604  | 0.000   |
| CPTI26\$1 | 3.466  | 1.056 | 3.281   | 0.001   |
| CPTI26\$2 | 6.691  | 1.795 | 3.727   | 0.000   |
| CPTI26\$3 | 9.848  | 2.563 | 3.843   | 0.000   |
| CPTI27\$1 | 1.256  | 0.331 | 3.790   | 0.000   |
| CPTI27\$2 | 3.516  | 0.523 | 6.723   | 0.000   |
| CPTI27\$3 | 5.494  | 0.670 | 8.202   | 0.000   |
| CPTI28\$1 | -0.093 | 0.153 | -0.608  | 0.543   |
| CPTI28\$2 | 1.839  | 0.217 | 8.467   | 0.000   |
| CPTI28\$3 | 3.848  | 0.386 | 9.978   | 0.000   |
| Variances |        |       |         |         |
| GD        | 1.000  | 0.000 | 999.000 | 999.000 |

|                    |       |       |         |         |       |
|--------------------|-------|-------|---------|---------|-------|
| CU                 | 1.000 | 0.000 | 999.000 | 999.000 |       |
| INS                | 1.000 | 0.000 | 999.000 | 999.000 |       |
| Residual Variances |       |       |         |         |       |
| CPTI1              | 1.000 | 0.000 | 999.000 | 999.000 |       |
| CPTI2              | 1.000 | 0.000 | 999.000 | 999.000 |       |
| CPTI3              | 1.000 | 0.000 | 999.000 | 999.000 |       |
| CPTI4              | 1.000 | 0.000 | 999.000 | 999.000 |       |
| CPTI5              | 1.000 | 0.000 | 999.000 | 999.000 |       |
| CPTI6              | 1.000 | 0.000 | 999.000 | 999.000 |       |
| CPTI7              | 1.000 | 0.000 | 999.000 | 999.000 |       |
| CPTI8              | 1.000 | 0.000 | 999.000 | 999.000 |       |
| CPTI9              | 1.000 | 0.000 | 999.000 | 999.000 |       |
| CPTI10             | 1.000 | 0.000 | 999.000 | 999.000 |       |
| CPTI11             | 1.000 | 0.000 | 999.000 | 999.000 |       |
| CPTI12             | 1.000 | 0.000 | 999.000 | 999.000 |       |
| CPTI13             | 1.000 | 0.000 | 999.000 | 999.000 |       |
| CPTI14             | 1.000 | 0.000 | 999.000 | 999.000 |       |
| CPTI15             | 1.000 | 0.000 | 999.000 | 999.000 |       |
| CPTI16             | 1.000 | 0.000 | 999.000 | 999.000 |       |
| CPTI17             | 1.000 | 0.000 | 999.000 | 999.000 |       |
| CPTI18             | 1.000 | 0.000 | 999.000 | 999.000 |       |
| CPTI19             | 1.000 | 0.000 | 999.000 | 999.000 |       |
| CPTI20             | 1.000 | 0.000 | 999.000 | 999.000 |       |
| CPTI21             | 1.000 | 0.000 | 999.000 | 999.000 |       |
| CPTI22             | 1.000 | 0.000 | 999.000 | 999.000 |       |
| CPTI23             | 1.000 | 0.000 | 999.000 | 999.000 |       |
| CPTI24             | 1.000 | 0.000 | 999.000 | 999.000 |       |
| CPTI25             | 1.000 | 0.000 | 999.000 | 999.000 |       |
| CPTI26             | 1.000 | 0.000 | 999.000 | 999.000 |       |
| CPTI27             | 1.000 | 0.000 | 999.000 | 999.000 |       |
| CPTI28             | 1.000 | 0.000 | 999.000 | 999.000 |       |
| Group GRANS        |       |       |         |         |       |
| GD                 | BY    |       |         |         |       |
| CPTI5              |       | 2.667 | 0.306   | 8.730   | 0.000 |
| CPTI7              |       | 1.601 | 0.196   | 8.152   | 0.000 |
| CPTI9              |       | 2.790 | 0.389   | 7.174   | 0.000 |
| CPTI15             |       | 4.073 | 0.919   | 4.430   | 0.000 |
| CPTI18             |       | 1.936 | 0.252   | 7.692   | 0.000 |
| CPTI21             |       | 2.332 | 0.349   | 6.680   | 0.000 |
| CPTI24             |       | 1.325 | 0.157   | 8.456   | 0.000 |
| CPTI26             |       | 4.425 | 1.235   | 3.582   | 0.000 |
| CU                 | BY    |       |         |         |       |
| CPTI2              |       | 0.945 | 0.111   | 8.524   | 0.000 |
| CPTI4              |       | 1.067 | 0.120   | 8.857   | 0.000 |
| CPTI8              |       | 1.218 | 0.134   | 9.072   | 0.000 |
| CPTI11             |       | 1.913 | 0.216   | 8.845   | 0.000 |
| CPTI13             |       | 2.722 | 0.475   | 5.724   | 0.000 |
| CPTI17             |       | 2.295 | 0.335   | 6.845   | 0.000 |
| CPTI20             |       | 2.037 | 0.246   | 8.291   | 0.000 |
| CPTI22             |       | 2.653 | 0.348   | 7.622   | 0.000 |
| CPTI25             |       | 1.941 | 0.206   | 9.430   | 0.000 |
| CPTI27             |       | 2.889 | 0.455   | 6.353   | 0.000 |
| INS                | BY    |       |         |         |       |
| CPTI1              |       | 0.553 | 0.076   | 7.232   | 0.000 |
| CPTI3              |       | 1.344 | 0.137   | 9.777   | 0.000 |
| CPTI6              |       | 1.343 | 0.143   | 9.384   | 0.000 |
| CPTI10             |       | 1.829 | 0.252   | 7.245   | 0.000 |
| CPTI12             |       | 2.446 | 0.410   | 5.965   | 0.000 |
| CPTI14             |       | 1.771 | 0.239   | 7.401   | 0.000 |
| CPTI16             |       | 1.545 | 0.180   | 8.598   | 0.000 |
| CPTI19             |       | 1.623 | 0.166   | 9.769   | 0.000 |
| CPTI23             |       | 1.437 | 0.180   | 7.966   | 0.000 |
| CPTI28             |       | 1.804 | 0.186   | 9.680   | 0.000 |
| CU                 | WITH  |       |         |         |       |
| GD                 |       | 1.144 | 0.216   | 5.297   | 0.000 |
| INS                | WITH  |       |         |         |       |
| GD                 |       | 1.247 | 0.212   | 5.886   | 0.000 |
| CU                 |       | 1.118 | 0.183   | 6.107   | 0.000 |

## Means

|     |        |       |        |       |
|-----|--------|-------|--------|-------|
| GD  | -0.182 | 0.146 | -1.245 | 0.213 |
| CU  | -0.355 | 0.136 | -2.603 | 0.009 |
| INS | -0.649 | 0.125 | -5.169 | 0.000 |

## Thresholds

|           |        |       |        |       |
|-----------|--------|-------|--------|-------|
| CPTI1\$1  | -0.490 | 0.075 | -6.492 | 0.000 |
| CPTI1\$2  | 0.424  | 0.074 | 5.730  | 0.000 |
| CPTI1\$3  | 1.476  | 0.154 | 9.590  | 0.000 |
| CPTI2\$1  | 0.432  | 0.099 | 4.370  | 0.000 |
| CPTI2\$2  | 1.739  | 0.169 | 10.275 | 0.000 |
| CPTI2\$3  | 2.821  | 0.258 | 10.948 | 0.000 |
| CPTI3\$1  | -0.372 | 0.122 | -3.060 | 0.002 |
| CPTI3\$2  | 0.999  | 0.141 | 7.068  | 0.000 |
| CPTI3\$3  | 2.311  | 0.220 | 10.524 | 0.000 |
| CPTI4\$1  | 0.418  | 0.108 | 3.872  | 0.000 |
| CPTI4\$2  | 1.784  | 0.177 | 10.081 | 0.000 |
| CPTI4\$3  | 2.783  | 0.253 | 10.982 | 0.000 |
| CPTI5\$1  | 0.944  | 0.262 | 3.607  | 0.000 |
| CPTI5\$2  | 3.476  | 0.411 | 8.454  | 0.000 |
| CPTI5\$3  | 5.662  | 0.657 | 8.621  | 0.000 |
| CPTI6\$1  | 0.056  | 0.119 | 0.466  | 0.641 |
| CPTI6\$2  | 1.470  | 0.164 | 8.956  | 0.000 |
| CPTI6\$3  | 3.033  | 0.240 | 12.644 | 0.000 |
| CPTI7\$1  | 1.307  | 0.203 | 6.453  | 0.000 |
| CPTI7\$2  | 2.824  | 0.326 | 8.659  | 0.000 |
| CPTI7\$3  | 4.190  | 0.448 | 9.352  | 0.000 |
| CPTI8\$1  | 0.333  | 0.120 | 2.765  | 0.006 |
| CPTI8\$2  | 1.375  | 0.156 | 8.817  | 0.000 |
| CPTI8\$3  | 2.400  | 0.216 | 11.108 | 0.000 |
| CPTI9\$1  | 1.361  | 0.313 | 4.351  | 0.000 |
| CPTI9\$2  | 3.724  | 0.517 | 7.202  | 0.000 |
| CPTI9\$3  | 5.877  | 0.781 | 7.524  | 0.000 |
| CPTI10\$1 | 0.693  | 0.181 | 3.827  | 0.000 |
| CPTI10\$2 | 2.400  | 0.306 | 7.830  | 0.000 |
| CPTI10\$3 | 3.955  | 0.460 | 8.599  | 0.000 |
| CPTI11\$1 | 0.712  | 0.186 | 3.830  | 0.000 |
| CPTI11\$2 | 2.577  | 0.271 | 9.500  | 0.000 |
| CPTI11\$3 | 4.584  | 0.388 | 11.825 | 0.000 |
| CPTI12\$1 | -0.795 | 0.224 | -3.555 | 0.000 |
| CPTI12\$2 | 1.908  | 0.339 | 5.634  | 0.000 |
| CPTI12\$3 | 4.140  | 0.562 | 7.369  | 0.000 |
| CPTI13\$1 | 1.514  | 0.353 | 4.288  | 0.000 |
| CPTI13\$2 | 3.696  | 0.593 | 6.237  | 0.000 |
| CPTI13\$3 | 6.289  | 0.910 | 6.913  | 0.000 |
| CPTI14\$1 | 0.470  | 0.164 | 2.868  | 0.004 |
| CPTI14\$2 | 2.409  | 0.292 | 8.261  | 0.000 |
| CPTI14\$3 | 4.071  | 0.429 | 9.488  | 0.000 |
| CPTI15\$1 | 2.781  | 0.739 | 3.763  | 0.000 |
| CPTI15\$2 | 5.884  | 1.278 | 4.604  | 0.000 |
| CPTI15\$3 | 8.562  | 1.844 | 4.644  | 0.000 |
| CPTI16\$1 | 0.246  | 0.137 | 1.792  | 0.073 |
| CPTI16\$2 | 1.857  | 0.207 | 8.959  | 0.000 |
| CPTI16\$3 | 3.514  | 0.353 | 9.965  | 0.000 |
| CPTI17\$1 | 0.728  | 0.231 | 3.149  | 0.002 |
| CPTI17\$2 | 2.661  | 0.398 | 6.688  | 0.000 |
| CPTI17\$3 | 4.442  | 0.551 | 8.065  | 0.000 |
| CPTI18\$1 | 1.298  | 0.239 | 5.433  | 0.000 |
| CPTI18\$2 | 2.947  | 0.351 | 8.396  | 0.000 |
| CPTI18\$3 | 5.017  | 0.561 | 8.945  | 0.000 |
| CPTI19\$1 | -0.575 | 0.145 | -3.954 | 0.000 |
| CPTI19\$2 | 1.172  | 0.161 | 7.276  | 0.000 |
| CPTI19\$3 | 2.726  | 0.241 | 11.319 | 0.000 |
| CPTI20\$1 | 0.517  | 0.193 | 2.680  | 0.007 |
| CPTI20\$2 | 2.391  | 0.290 | 8.252  | 0.000 |
| CPTI20\$3 | 4.428  | 0.456 | 9.713  | 0.000 |
| CPTI21\$1 | 1.459  | 0.294 | 4.958  | 0.000 |
| CPTI21\$2 | 3.724  | 0.505 | 7.370  | 0.000 |
| CPTI21\$3 | 5.428  | 0.720 | 7.537  | 0.000 |
| CPTI22\$1 | 1.191  | 0.287 | 4.158  | 0.000 |
| CPTI22\$2 | 3.262  | 0.402 | 8.113  | 0.000 |
| CPTI22\$3 | 5.472  | 0.573 | 9.554  | 0.000 |
| CPTI23\$1 | -0.116 | 0.124 | -0.935 | 0.350 |
| CPTI23\$2 | 1.406  | 0.203 | 6.932  | 0.000 |
| CPTI23\$3 | 2.785  | 0.342 | 8.143  | 0.000 |
| CPTI24\$1 | 1.110  | 0.171 | 6.479  | 0.000 |

|           |        |       |        |       |
|-----------|--------|-------|--------|-------|
| CPTI24\$2 | 2.472  | 0.275 | 8.975  | 0.000 |
| CPTI24\$3 | 3.448  | 0.357 | 9.663  | 0.000 |
| CPTI25\$1 | 0.579  | 0.183 | 3.163  | 0.002 |
| CPTI25\$2 | 2.325  | 0.243 | 9.559  | 0.000 |
| CPTI25\$3 | 4.165  | 0.359 | 11.604 | 0.000 |
| CPTI26\$1 | 3.466  | 1.056 | 3.281  | 0.001 |
| CPTI26\$2 | 6.691  | 1.795 | 3.727  | 0.000 |
| CPTI26\$3 | 9.848  | 2.563 | 3.843  | 0.000 |
| CPTI27\$1 | 1.256  | 0.331 | 3.790  | 0.000 |
| CPTI27\$2 | 3.516  | 0.523 | 6.723  | 0.000 |
| CPTI27\$3 | 5.494  | 0.670 | 8.202  | 0.000 |
| CPTI28\$1 | -0.093 | 0.153 | -0.608 | 0.543 |
| CPTI28\$2 | 1.839  | 0.217 | 8.467  | 0.000 |
| CPTI28\$3 | 3.848  | 0.386 | 9.978  | 0.000 |

Variiances

|     |       |       |       |       |
|-----|-------|-------|-------|-------|
| GD  | 1.471 | 0.315 | 4.676 | 0.000 |
| CU  | 1.172 | 0.243 | 4.833 | 0.000 |
| INS | 1.682 | 0.303 | 5.546 | 0.000 |

Residual Variiances

|        |       |       |       |       |
|--------|-------|-------|-------|-------|
| CPTI1  | 0.477 | 0.122 | 3.913 | 0.000 |
| CPTI2  | 0.592 | 0.138 | 4.295 | 0.000 |
| CPTI3  | 1.003 | 0.227 | 4.424 | 0.000 |
| CPTI4  | 0.900 | 0.209 | 4.298 | 0.000 |
| CPTI5  | 1.311 | 0.401 | 3.268 | 0.001 |
| CPTI6  | 1.048 | 0.250 | 4.198 | 0.000 |
| CPTI7  | 0.974 | 0.265 | 3.677 | 0.000 |
| CPTI8  | 0.402 | 0.100 | 4.041 | 0.000 |
| CPTI9  | 0.717 | 0.242 | 2.960 | 0.003 |
| CPTI10 | 1.275 | 0.382 | 3.336 | 0.001 |
| CPTI11 | 0.968 | 0.231 | 4.200 | 0.000 |
| CPTI12 | 2.329 | 0.780 | 2.986 | 0.003 |
| CPTI13 | 1.997 | 0.696 | 2.870 | 0.004 |
| CPTI14 | 1.434 | 0.388 | 3.694 | 0.000 |
| CPTI15 | 1.167 | 0.557 | 2.096 | 0.036 |
| CPTI16 | 1.078 | 0.252 | 4.271 | 0.000 |
| CPTI17 | 0.734 | 0.247 | 2.970 | 0.003 |
| CPTI18 | 0.901 | 0.258 | 3.489 | 0.000 |
| CPTI19 | 0.869 | 0.189 | 4.604 | 0.000 |
| CPTI20 | 0.928 | 0.262 | 3.549 | 0.000 |
| CPTI21 | 1.048 | 0.339 | 3.093 | 0.002 |
| CPTI22 | 0.856 | 0.228 | 3.753 | 0.000 |
| CPTI23 | 1.344 | 0.392 | 3.433 | 0.001 |
| CPTI24 | 0.563 | 0.158 | 3.560 | 0.000 |
| CPTI25 | 0.621 | 0.154 | 4.024 | 0.000 |
| CPTI26 | 2.178 | 1.237 | 1.761 | 0.078 |
| CPTI27 | 1.215 | 0.376 | 3.228 | 0.001 |
| CPTI28 | 1.314 | 0.286 | 4.589 | 0.000 |

R-SQUARE

Group PETITS

| Observed Variable | Estimate | S.E.  | Est./S.E. | Two-Tailed P-Value | Scale Factors |
|-------------------|----------|-------|-----------|--------------------|---------------|
| CPTI1             | 0.234    | 0.050 | 4.722     | 0.000              | 0.875         |
| CPTI2             | 0.472    | 0.058 | 8.070     | 0.000              | 0.727         |
| CPTI3             | 0.644    | 0.047 | 13.713    | 0.000              | 0.597         |
| CPTI4             | 0.532    | 0.056 | 9.468     | 0.000              | 0.684         |
| CPTI5             | 0.877    | 0.025 | 35.424    | 0.000              | 0.351         |
| CPTI6             | 0.643    | 0.049 | 13.158    | 0.000              | 0.597         |
| CPTI7             | 0.719    | 0.050 | 14.526    | 0.000              | 0.530         |
| CPTI8             | 0.597    | 0.053 | 11.269    | 0.000              | 0.634         |
| CPTI9             | 0.886    | 0.028 | 31.509    | 0.000              | 0.337         |
| CPTI10            | 0.770    | 0.049 | 15.742    | 0.000              | 0.480         |
| CPTI11            | 0.785    | 0.038 | 20.601    | 0.000              | 0.463         |
| CPTI12            | 0.857    | 0.041 | 20.827    | 0.000              | 0.378         |
| CPTI13            | 0.881    | 0.037 | 24.064    | 0.000              | 0.345         |
| CPTI14            | 0.758    | 0.050 | 15.309    | 0.000              | 0.492         |
| CPTI15            | 0.943    | 0.024 | 38.961    | 0.000              | 0.238         |
| CPTI16            | 0.705    | 0.048 | 14.561    | 0.000              | 0.543         |
| CPTI17            | 0.840    | 0.039 | 21.454    | 0.000              | 0.399         |

|        |       |       |        |       |       |
|--------|-------|-------|--------|-------|-------|
| CPTI18 | 0.789 | 0.043 | 18.267 | 0.000 | 0.459 |
| CPTI19 | 0.725 | 0.041 | 17.756 | 0.000 | 0.525 |
| CPTI20 | 0.806 | 0.038 | 21.351 | 0.000 | 0.441 |
| CPTI21 | 0.845 | 0.039 | 21.507 | 0.000 | 0.394 |
| CPTI22 | 0.876 | 0.029 | 30.636 | 0.000 | 0.353 |
| CPTI23 | 0.674 | 0.055 | 12.204 | 0.000 | 0.571 |
| CPTI24 | 0.637 | 0.055 | 11.653 | 0.000 | 0.602 |
| CPTI25 | 0.790 | 0.035 | 22.481 | 0.000 | 0.458 |
| CPTI26 | 0.951 | 0.026 | 36.856 | 0.000 | 0.220 |
| CPTI27 | 0.893 | 0.030 | 29.679 | 0.000 | 0.327 |
| CPTI28 | 0.765 | 0.037 | 20.599 | 0.000 | 0.485 |

Group GRANS

| Observed Variable | Estimate | S.E.  | Est./S.E. | Two-Tailed P-Value | Scale Factors |
|-------------------|----------|-------|-----------|--------------------|---------------|
| CPTI1             | 0.519    | 0.039 | 13.298    | 0.000              | 1.004         |
| CPTI2             | 0.639    | 0.038 | 16.623    | 0.000              | 0.781         |
| CPTI3             | 0.752    | 0.028 | 26.886    | 0.000              | 0.498         |
| CPTI4             | 0.597    | 0.039 | 15.179    | 0.000              | 0.669         |
| CPTI5             | 0.889    | 0.016 | 55.943    | 0.000              | 0.291         |
| CPTI6             | 0.743    | 0.036 | 20.639    | 0.000              | 0.495         |
| CPTI7             | 0.795    | 0.027 | 29.961    | 0.000              | 0.459         |
| CPTI8             | 0.812    | 0.027 | 30.376    | 0.000              | 0.683         |
| CPTI9             | 0.941    | 0.011 | 83.079    | 0.000              | 0.287         |
| CPTI10            | 0.815    | 0.031 | 26.721    | 0.000              | 0.381         |
| CPTI11            | 0.816    | 0.028 | 29.027    | 0.000              | 0.436         |
| CPTI12            | 0.812    | 0.027 | 30.123    | 0.000              | 0.284         |
| CPTI13            | 0.813    | 0.031 | 26.343    | 0.000              | 0.306         |
| CPTI14            | 0.786    | 0.031 | 25.149    | 0.000              | 0.386         |
| CPTI15            | 0.954    | 0.011 | 90.062    | 0.000              | 0.198         |
| CPTI16            | 0.788    | 0.028 | 28.490    | 0.000              | 0.443         |
| CPTI17            | 0.894    | 0.017 | 52.612    | 0.000              | 0.380         |
| CPTI18            | 0.860    | 0.021 | 40.549    | 0.000              | 0.395         |
| CPTI19            | 0.836    | 0.021 | 38.886    | 0.000              | 0.434         |
| CPTI20            | 0.840    | 0.025 | 34.214    | 0.000              | 0.415         |
| CPTI21            | 0.884    | 0.021 | 43.021    | 0.000              | 0.332         |
| CPTI22            | 0.906    | 0.018 | 49.757    | 0.000              | 0.331         |
| CPTI23            | 0.721    | 0.033 | 21.946    | 0.000              | 0.456         |
| CPTI24            | 0.821    | 0.026 | 31.637    | 0.000              | 0.564         |
| CPTI25            | 0.877    | 0.020 | 43.808    | 0.000              | 0.446         |
| CPTI26            | 0.930    | 0.017 | 55.969    | 0.000              | 0.180         |
| CPTI27            | 0.889    | 0.023 | 38.339    | 0.000              | 0.302         |
| CPTI28            | 0.806    | 0.024 | 33.096    | 0.000              | 0.384         |

INPUT READING TERMINATED NORMALLY

CFA CPTI: Configural Invariance

SUMMARY OF ANALYSIS

|                                       |     |
|---------------------------------------|-----|
| Number of groups                      | 2   |
| Number of observations                |     |
| Group PETITS                          | 214 |
| Group GRANS                           | 529 |
| Total sample size                     | 743 |
| Number of dependent variables         | 28  |
| Number of independent variables       | 0   |
| Number of continuous latent variables | 3   |

Observed dependent variables

Binary and ordered categorical (ordinal)

|        |        |        |        |        |        |
|--------|--------|--------|--------|--------|--------|
| CPTI1  | CPTI2  | CPTI3  | CPTI4  | CPTI5  | CPTI6  |
| CPTI7  | CPTI8  | CPTI9  | CPTI10 | CPTI11 | CPTI12 |
| CPTI13 | CPTI14 | CPTI15 | CPTI16 | CPTI17 | CPTI18 |
| CPTI19 | CPTI20 | CPTI21 | CPTI22 | CPTI23 | CPTI24 |
| CPTI25 | CPTI26 | CPTI27 | CPTI28 |        |        |

Continuous latent variables

GD CU INS

Variables with special functions

Grouping variable CURS

|                                               |           |
|-----------------------------------------------|-----------|
| Estimator                                     | WLSMV     |
| Maximum number of iterations                  | 1000      |
| Convergence criterion                         | 0.500D-04 |
| Maximum number of steepest descent iterations | 20        |
| Maximum number of iterations for H1           | 2000      |
| Convergence criterion for H1                  | 0.100D-03 |
| Parameterization                              | THETA     |

Input data file(s)  
CPTI.dat

Input data format FREE

SUMMARY OF DATA

|                                 |   |
|---------------------------------|---|
| Group PETITS                    |   |
| Number of missing data patterns | 1 |
| Group GRANS                     |   |
| Number of missing data patterns | 1 |

COVARIANCE COVERAGE OF DATA

Minimum covariance coverage value 0.100

THE MODEL ESTIMATION TERMINATED NORMALLY

MODEL FIT INFORMATION

Number of Free Parameters 177

Chi-Square Test of Model Fit

|                    |           |
|--------------------|-----------|
| Value              | 2163.444* |
| Degrees of Freedom | 747       |
| P-Value            | 0.0000    |

Chi-Square Contribution From Each Group

|        |          |
|--------|----------|
| PETITS | 1023.139 |
| GRANS  | 1140.305 |

Chi-Square Test for Difference Testing

|                    |        |
|--------------------|--------|
| Value              | 50.968 |
| Degrees of Freedom | 25     |
| P-Value            | 0.0016 |

\* The chi-square value for MLM, MLMV, MLR, ULSMV, WLSM and WLSMV cannot be used for chi-square difference testing in the regular way. MLM, MLR and WLSM chi-square difference testing is described on the Mplus website. MLMV, WLSMV, and ULSMV difference testing is done using the DIFFTEST option.

RMSEA (Root Mean Square Error Of Approximation)

|                          |             |
|--------------------------|-------------|
| Estimate                 | 0.071       |
| 90 Percent C.I.          | 0.068 0.075 |
| Probability RMSEA <= .05 | 0.000       |

CFI/TLI

|     |       |
|-----|-------|
| CFI | 0.978 |
| TLI | 0.977 |



Chi-Square Test of Model Fit for the Baseline Model

Value 64374.820  
 Degrees of Freedom 756  
 P-Value 0.0000

WRMR (Weighted Root Mean Square Residual)

Value 2.556

MODEL RESULTS

|              |          | Estimate | S.E.  | Est./S.E. | Two-Tailed<br>P-Value |
|--------------|----------|----------|-------|-----------|-----------------------|
| Group PETITS |          |          |       |           |                       |
| GD           | BY       |          |       |           |                       |
|              | CPTI5    | 2.478    | 0.190 | 13.013    | 0.000                 |
|              | CPTI7    | 1.628    | 0.141 | 11.550    | 0.000                 |
|              | CPTI9    | 3.083    | 0.296 | 10.417    | 0.000                 |
|              | CPTI15   | 3.868    | 0.453 | 8.532     | 0.000                 |
|              | CPTI18   | 2.028    | 0.187 | 10.821    | 0.000                 |
|              | CPTI21   | 2.274    | 0.218 | 10.445    | 0.000                 |
|              | CPTI24   | 1.610    | 0.139 | 11.562    | 0.000                 |
|              | CPTI26   | 3.382    | 0.425 | 7.951     | 0.000                 |
| CU           | BY       |          |       |           |                       |
|              | CPTI2    | 1.089    | 0.102 | 10.685    | 0.000                 |
|              | CPTI4    | 1.058    | 0.097 | 10.910    | 0.000                 |
|              | CPTI8    | 1.594    | 0.155 | 10.252    | 0.000                 |
|              | CPTI11   | 1.860    | 0.177 | 10.523    | 0.000                 |
|              | CPTI13   | 2.061    | 0.218 | 9.456     | 0.000                 |
|              | CPTI17   | 2.450    | 0.231 | 10.627    | 0.000                 |
|              | CPTI20   | 2.001    | 0.192 | 10.437    | 0.000                 |
|              | CPTI22   | 2.689    | 0.279 | 9.654     | 0.000                 |
|              | CPTI25   | 2.175    | 0.208 | 10.437    | 0.000                 |
|              | CPTI27   | 2.587    | 0.286 | 9.039     | 0.000                 |
| INS          | BY       |          |       |           |                       |
|              | CPTI1    | 0.774    | 0.067 | 11.583    | 0.000                 |
|              | CPTI3    | 1.414    | 0.112 | 12.608    | 0.000                 |
|              | CPTI6    | 1.388    | 0.119 | 11.627    | 0.000                 |
|              | CPTI10   | 1.783    | 0.170 | 10.479    | 0.000                 |
|              | CPTI12   | 1.963    | 0.189 | 10.381    | 0.000                 |
|              | CPTI14   | 1.670    | 0.153 | 10.888    | 0.000                 |
|              | CPTI16   | 1.587    | 0.135 | 11.789    | 0.000                 |
|              | CPTI19   | 1.778    | 0.147 | 12.107    | 0.000                 |
|              | CPTI23   | 1.380    | 0.112 | 12.304    | 0.000                 |
|              | CPTI28   | 1.746    | 0.136 | 12.799    | 0.000                 |
| CU           | WITH     |          |       |           |                       |
|              | GD       | 0.813    | 0.024 | 33.702    | 0.000                 |
| INS          | WITH     |          |       |           |                       |
|              | GD       | 0.729    | 0.038 | 19.094    | 0.000                 |
|              | CU       | 0.783    | 0.029 | 27.472    | 0.000                 |
| Means        |          |          |       |           |                       |
|              | GD       | 0.000    | 0.000 | 999.000   | 999.000               |
|              | CU       | 0.000    | 0.000 | 999.000   | 999.000               |
|              | INS      | 0.000    | 0.000 | 999.000   | 999.000               |
| Thresholds   |          |          |       |           |                       |
|              | CPTI1\$1 | -0.998   | 0.122 | -8.207    | 0.000                 |
|              | CPTI1\$2 | 0.315    | 0.110 | 2.867     | 0.004                 |
|              | CPTI1\$3 | 2.101    | 0.104 | 20.153    | 0.000                 |
|              | CPTI2\$1 | 0.439    | 0.133 | 3.300     | 0.001                 |
|              | CPTI2\$2 | 2.037    | 0.184 | 11.087    | 0.000                 |
|              | CPTI2\$3 | 3.412    | 0.200 | 17.068    | 0.000                 |
|              | CPTI3\$1 | -0.430   | 0.148 | -2.908    | 0.004                 |
|              | CPTI3\$2 | 1.032    | 0.162 | 6.388     | 0.000                 |
|              | CPTI3\$3 | 2.831    | 0.142 | 19.912    | 0.000                 |
|              | CPTI4\$1 | 0.362    | 0.129 | 2.804     | 0.005                 |

|           |        |       |        |       |
|-----------|--------|-------|--------|-------|
| CPTI4\$2  | 1.734  | 0.163 | 10.659 | 0.000 |
| CPTI4\$3  | 3.047  | 0.147 | 20.772 | 0.000 |
| CPTI5\$1  | 0.827  | 0.248 | 3.336  | 0.001 |
| CPTI5\$2  | 3.453  | 0.332 | 10.406 | 0.000 |
| CPTI5\$3  | 5.537  | 0.349 | 15.882 | 0.000 |
| CPTI6\$1  | -0.181 | 0.146 | -1.240 | 0.215 |
| CPTI6\$2  | 1.351  | 0.166 | 8.120  | 0.000 |
| CPTI6\$3  | 3.415  | 0.186 | 18.352 | 0.000 |
| CPTI7\$1  | 1.360  | 0.199 | 6.833  | 0.000 |
| CPTI7\$2  | 3.206  | 0.283 | 11.331 | 0.000 |
| CPTI7\$3  | 4.401  | 0.264 | 16.685 | 0.000 |
| CPTI8\$1  | 0.422  | 0.168 | 2.512  | 0.012 |
| CPTI8\$2  | 1.707  | 0.203 | 8.404  | 0.000 |
| CPTI8\$3  | 3.566  | 0.170 | 21.025 | 0.000 |
| CPTI9\$1  | 1.536  | 0.333 | 4.619  | 0.000 |
| CPTI9\$2  | 4.100  | 0.465 | 8.817  | 0.000 |
| CPTI9\$3  | 6.882  | 0.504 | 13.656 | 0.000 |
| CPTI10\$1 | 0.734  | 0.191 | 3.845  | 0.000 |
| CPTI10\$2 | 2.295  | 0.236 | 9.744  | 0.000 |
| CPTI10\$3 | 4.258  | 0.281 | 15.175 | 0.000 |
| CPTI11\$1 | 0.550  | 0.193 | 2.855  | 0.004 |
| CPTI11\$2 | 2.417  | 0.257 | 9.424  | 0.000 |
| CPTI11\$3 | 4.906  | 0.257 | 19.082 | 0.000 |
| CPTI12\$1 | -0.337 | 0.188 | -1.788 | 0.074 |
| CPTI12\$2 | 1.921  | 0.236 | 8.135  | 0.000 |
| CPTI12\$3 | 3.869  | 0.227 | 17.025 | 0.000 |
| CPTI13\$1 | 1.270  | 0.242 | 5.245  | 0.000 |
| CPTI13\$2 | 2.783  | 0.309 | 8.995  | 0.000 |
| CPTI13\$3 | 5.397  | 0.338 | 15.965 | 0.000 |
| CPTI14\$1 | 0.675  | 0.180 | 3.755  | 0.000 |
| CPTI14\$2 | 2.273  | 0.232 | 9.815  | 0.000 |
| CPTI14\$3 | 4.258  | 0.252 | 16.922 | 0.000 |
| CPTI15\$1 | 2.665  | 0.503 | 5.297  | 0.000 |
| CPTI15\$2 | 5.388  | 0.663 | 8.126  | 0.000 |
| CPTI15\$3 | 8.630  | 0.857 | 10.069 | 0.000 |
| CPTI16\$1 | 0.242  | 0.163 | 1.483  | 0.138 |
| CPTI16\$2 | 1.636  | 0.186 | 8.806  | 0.000 |
| CPTI16\$3 | 4.024  | 0.222 | 18.148 | 0.000 |
| CPTI17\$1 | 0.819  | 0.248 | 3.300  | 0.001 |
| CPTI17\$2 | 2.802  | 0.305 | 9.183  | 0.000 |
| CPTI17\$3 | 5.340  | 0.309 | 17.307 | 0.000 |
| CPTI18\$1 | 1.315  | 0.233 | 5.636  | 0.000 |
| CPTI18\$2 | 3.115  | 0.300 | 10.402 | 0.000 |
| CPTI18\$3 | 5.465  | 0.375 | 14.557 | 0.000 |
| CPTI19\$1 | -0.656 | 0.175 | -3.759 | 0.000 |
| CPTI19\$2 | 1.273  | 0.190 | 6.685  | 0.000 |
| CPTI19\$3 | 3.475  | 0.170 | 20.493 | 0.000 |
| CPTI20\$1 | 0.448  | 0.201 | 2.234  | 0.025 |
| CPTI20\$2 | 2.368  | 0.265 | 8.949  | 0.000 |
| CPTI20\$3 | 4.920  | 0.286 | 17.228 | 0.000 |
| CPTI21\$1 | 1.411  | 0.258 | 5.458  | 0.000 |
| CPTI21\$2 | 3.846  | 0.357 | 10.769 | 0.000 |
| CPTI21\$3 | 5.562  | 0.360 | 15.440 | 0.000 |
| CPTI22\$1 | 1.139  | 0.289 | 3.937  | 0.000 |
| CPTI22\$2 | 3.221  | 0.369 | 8.722  | 0.000 |
| CPTI22\$3 | 6.533  | 0.387 | 16.897 | 0.000 |
| CPTI23\$1 | 0.020  | 0.146 | 0.137  | 0.891 |
| CPTI23\$2 | 1.770  | 0.183 | 9.666  | 0.000 |
| CPTI23\$3 | 3.095  | 0.168 | 18.415 | 0.000 |
| CPTI24\$1 | 1.292  | 0.196 | 6.580  | 0.000 |
| CPTI24\$2 | 2.935  | 0.277 | 10.594 | 0.000 |
| CPTI24\$3 | 4.330  | 0.244 | 17.737 | 0.000 |
| CPTI25\$1 | 0.711  | 0.221 | 3.222  | 0.001 |
| CPTI25\$2 | 2.635  | 0.279 | 9.459  | 0.000 |
| CPTI25\$3 | 5.338  | 0.295 | 18.120 | 0.000 |
| CPTI26\$1 | 2.509  | 0.463 | 5.425  | 0.000 |
| CPTI26\$2 | 4.859  | 0.650 | 7.474  | 0.000 |
| CPTI26\$3 | 7.937  | 0.805 | 9.861  | 0.000 |
| CPTI27\$1 | 1.278  | 0.286 | 4.475  | 0.000 |
| CPTI27\$2 | 3.237  | 0.384 | 8.422  | 0.000 |
| CPTI27\$3 | 5.857  | 0.399 | 14.695 | 0.000 |
| CPTI28\$1 | -0.142 | 0.171 | -0.828 | 0.408 |
| CPTI28\$2 | 1.897  | 0.206 | 9.214  | 0.000 |
| CPTI28\$3 | 4.256  | 0.218 | 19.554 | 0.000 |

Variances

|                    |       |       |         |         |       |
|--------------------|-------|-------|---------|---------|-------|
| GD                 | 1.000 | 0.000 | 999.000 | 999.000 |       |
| CU                 | 1.000 | 0.000 | 999.000 | 999.000 |       |
| INS                | 1.000 | 0.000 | 999.000 | 999.000 |       |
| Residual Variances |       |       |         |         |       |
| CPTI1              | 1.000 | 0.000 | 999.000 | 999.000 |       |
| CPTI2              | 1.000 | 0.000 | 999.000 | 999.000 |       |
| CPTI3              | 1.000 | 0.000 | 999.000 | 999.000 |       |
| CPTI4              | 1.000 | 0.000 | 999.000 | 999.000 |       |
| CPTI5              | 1.000 | 0.000 | 999.000 | 999.000 |       |
| CPTI6              | 1.000 | 0.000 | 999.000 | 999.000 |       |
| CPTI7              | 1.000 | 0.000 | 999.000 | 999.000 |       |
| CPTI8              | 1.000 | 0.000 | 999.000 | 999.000 |       |
| CPTI9              | 1.000 | 0.000 | 999.000 | 999.000 |       |
| CPTI10             | 1.000 | 0.000 | 999.000 | 999.000 |       |
| CPTI11             | 1.000 | 0.000 | 999.000 | 999.000 |       |
| CPTI12             | 1.000 | 0.000 | 999.000 | 999.000 |       |
| CPTI13             | 1.000 | 0.000 | 999.000 | 999.000 |       |
| CPTI14             | 1.000 | 0.000 | 999.000 | 999.000 |       |
| CPTI15             | 1.000 | 0.000 | 999.000 | 999.000 |       |
| CPTI16             | 1.000 | 0.000 | 999.000 | 999.000 |       |
| CPTI17             | 1.000 | 0.000 | 999.000 | 999.000 |       |
| CPTI18             | 1.000 | 0.000 | 999.000 | 999.000 |       |
| CPTI19             | 1.000 | 0.000 | 999.000 | 999.000 |       |
| CPTI20             | 1.000 | 0.000 | 999.000 | 999.000 |       |
| CPTI21             | 1.000 | 0.000 | 999.000 | 999.000 |       |
| CPTI22             | 1.000 | 0.000 | 999.000 | 999.000 |       |
| CPTI23             | 1.000 | 0.000 | 999.000 | 999.000 |       |
| CPTI24             | 1.000 | 0.000 | 999.000 | 999.000 |       |
| CPTI25             | 1.000 | 0.000 | 999.000 | 999.000 |       |
| CPTI26             | 1.000 | 0.000 | 999.000 | 999.000 |       |
| CPTI27             | 1.000 | 0.000 | 999.000 | 999.000 |       |
| CPTI28             | 1.000 | 0.000 | 999.000 | 999.000 |       |
| Group GRANS        |       |       |         |         |       |
| GD                 | BY    |       |         |         |       |
| CPTI5              |       | 2.478 | 0.190   | 13.013  | 0.000 |
| CPTI7              |       | 1.628 | 0.141   | 11.550  | 0.000 |
| CPTI9              |       | 3.083 | 0.296   | 10.417  | 0.000 |
| CPTI15             |       | 3.868 | 0.453   | 8.532   | 0.000 |
| CPTI18             |       | 2.028 | 0.187   | 10.821  | 0.000 |
| CPTI21             |       | 2.274 | 0.218   | 10.445  | 0.000 |
| CPTI24             |       | 1.610 | 0.139   | 11.562  | 0.000 |
| CPTI26             |       | 3.382 | 0.425   | 7.951   | 0.000 |
| CU                 | BY    |       |         |         |       |
| CPTI2              |       | 1.089 | 0.102   | 10.685  | 0.000 |
| CPTI4              |       | 1.058 | 0.097   | 10.910  | 0.000 |
| CPTI8              |       | 1.594 | 0.155   | 10.252  | 0.000 |
| CPTI11             |       | 1.860 | 0.177   | 10.523  | 0.000 |
| CPTI13             |       | 2.061 | 0.218   | 9.456   | 0.000 |
| CPTI17             |       | 2.450 | 0.231   | 10.627  | 0.000 |
| CPTI20             |       | 2.001 | 0.192   | 10.437  | 0.000 |
| CPTI22             |       | 2.689 | 0.279   | 9.654   | 0.000 |
| CPTI25             |       | 2.175 | 0.208   | 10.437  | 0.000 |
| CPTI27             |       | 2.587 | 0.286   | 9.039   | 0.000 |
| INS                | BY    |       |         |         |       |
| CPTI1              |       | 0.774 | 0.067   | 11.583  | 0.000 |
| CPTI3              |       | 1.414 | 0.112   | 12.608  | 0.000 |
| CPTI6              |       | 1.388 | 0.119   | 11.627  | 0.000 |
| CPTI10             |       | 1.783 | 0.170   | 10.479  | 0.000 |
| CPTI12             |       | 1.963 | 0.189   | 10.381  | 0.000 |
| CPTI14             |       | 1.670 | 0.153   | 10.888  | 0.000 |
| CPTI16             |       | 1.587 | 0.135   | 11.789  | 0.000 |
| CPTI19             |       | 1.778 | 0.147   | 12.107  | 0.000 |
| CPTI23             |       | 1.380 | 0.112   | 12.304  | 0.000 |
| CPTI28             |       | 1.746 | 0.136   | 12.799  | 0.000 |
| CU                 | WITH  |       |         |         |       |
| GD                 |       | 1.210 | 0.178   | 6.795   | 0.000 |
| INS                | WITH  |       |         |         |       |
| GD                 |       | 1.145 | 0.157   | 7.291   | 0.000 |
| CU                 |       | 1.097 | 0.148   | 7.417   | 0.000 |

## Means

|     |       |       |         |         |
|-----|-------|-------|---------|---------|
| GD  | 0.000 | 0.000 | 999.000 | 999.000 |
| CU  | 0.000 | 0.000 | 999.000 | 999.000 |
| INS | 0.000 | 0.000 | 999.000 | 999.000 |

## Thresholds

|           |        |       |        |       |
|-----------|--------|-------|--------|-------|
| CPTI1\$1  | -0.042 | 0.074 | -0.567 | 0.571 |
| CPTI1\$2  | 1.145  | 0.087 | 13.132 | 0.000 |
| CPTI1\$3  | 2.101  | 0.104 | 20.153 | 0.000 |
| CPTI2\$1  | 0.971  | 0.105 | 9.287  | 0.000 |
| CPTI2\$2  | 2.510  | 0.147 | 17.109 | 0.000 |
| CPTI2\$3  | 3.412  | 0.200 | 17.068 | 0.000 |
| CPTI3\$1  | 0.513  | 0.113 | 4.522  | 0.000 |
| CPTI3\$2  | 1.829  | 0.136 | 13.443 | 0.000 |
| CPTI3\$3  | 2.831  | 0.142 | 19.912 | 0.000 |
| CPTI4\$1  | 0.866  | 0.101 | 8.559  | 0.000 |
| CPTI4\$2  | 2.302  | 0.137 | 16.791 | 0.000 |
| CPTI4\$3  | 3.047  | 0.147 | 20.772 | 0.000 |
| CPTI5\$1  | 1.346  | 0.207 | 6.489  | 0.000 |
| CPTI5\$2  | 3.543  | 0.267 | 13.276 | 0.000 |
| CPTI5\$3  | 5.537  | 0.349 | 15.882 | 0.000 |
| CPTI6\$1  | 1.034  | 0.130 | 7.961  | 0.000 |
| CPTI6\$2  | 2.360  | 0.166 | 14.242 | 0.000 |
| CPTI6\$3  | 3.415  | 0.186 | 18.352 | 0.000 |
| CPTI7\$1  | 1.596  | 0.166 | 9.627  | 0.000 |
| CPTI7\$2  | 3.023  | 0.209 | 14.481 | 0.000 |
| CPTI7\$3  | 4.401  | 0.264 | 16.685 | 0.000 |
| CPTI8\$1  | 1.080  | 0.137 | 7.871  | 0.000 |
| CPTI8\$2  | 2.543  | 0.176 | 14.423 | 0.000 |
| CPTI8\$3  | 3.566  | 0.170 | 21.025 | 0.000 |
| CPTI9\$1  | 2.034  | 0.288 | 7.053  | 0.000 |
| CPTI9\$2  | 4.654  | 0.378 | 12.311 | 0.000 |
| CPTI9\$3  | 6.882  | 0.504 | 13.656 | 0.000 |
| CPTI10\$1 | 1.648  | 0.191 | 8.605  | 0.000 |
| CPTI10\$2 | 3.259  | 0.259 | 12.566 | 0.000 |
| CPTI10\$3 | 4.258  | 0.281 | 15.175 | 0.000 |
| CPTI11\$1 | 1.511  | 0.177 | 8.560  | 0.000 |
| CPTI11\$2 | 3.418  | 0.253 | 13.495 | 0.000 |
| CPTI11\$3 | 4.906  | 0.257 | 19.082 | 0.000 |
| CPTI12\$1 | 0.370  | 0.145 | 2.553  | 0.011 |
| CPTI12\$2 | 2.320  | 0.211 | 10.983 | 0.000 |
| CPTI12\$3 | 3.869  | 0.227 | 17.025 | 0.000 |
| CPTI13\$1 | 1.910  | 0.227 | 8.408  | 0.000 |
| CPTI13\$2 | 3.760  | 0.323 | 11.646 | 0.000 |
| CPTI13\$3 | 5.397  | 0.338 | 15.965 | 0.000 |
| CPTI14\$1 | 1.253  | 0.159 | 7.875  | 0.000 |
| CPTI14\$2 | 3.090  | 0.234 | 13.196 | 0.000 |
| CPTI14\$3 | 4.258  | 0.252 | 16.922 | 0.000 |
| CPTI15\$1 | 3.310  | 0.489 | 6.770  | 0.000 |
| CPTI15\$2 | 6.376  | 0.680 | 9.380  | 0.000 |
| CPTI15\$3 | 8.630  | 0.857 | 10.069 | 0.000 |
| CPTI16\$1 | 1.191  | 0.147 | 8.093  | 0.000 |
| CPTI16\$2 | 2.942  | 0.199 | 14.757 | 0.000 |
| CPTI16\$3 | 4.024  | 0.222 | 18.148 | 0.000 |
| CPTI17\$1 | 1.727  | 0.231 | 7.467  | 0.000 |
| CPTI17\$2 | 3.959  | 0.330 | 12.007 | 0.000 |
| CPTI17\$3 | 5.340  | 0.309 | 17.307 | 0.000 |
| CPTI18\$1 | 1.739  | 0.201 | 8.652  | 0.000 |
| CPTI18\$2 | 3.412  | 0.249 | 13.690 | 0.000 |
| CPTI18\$3 | 5.465  | 0.375 | 14.557 | 0.000 |
| CPTI19\$1 | 0.510  | 0.135 | 3.772  | 0.000 |
| CPTI19\$2 | 2.257  | 0.168 | 13.443 | 0.000 |
| CPTI19\$3 | 3.475  | 0.170 | 20.493 | 0.000 |
| CPTI20\$1 | 1.324  | 0.178 | 7.451  | 0.000 |
| CPTI20\$2 | 3.238  | 0.247 | 13.120 | 0.000 |
| CPTI20\$3 | 4.920  | 0.286 | 17.228 | 0.000 |
| CPTI21\$1 | 1.836  | 0.238 | 7.726  | 0.000 |
| CPTI21\$2 | 3.935  | 0.327 | 12.029 | 0.000 |
| CPTI21\$3 | 5.562  | 0.360 | 15.440 | 0.000 |
| CPTI22\$1 | 2.334  | 0.285 | 8.188  | 0.000 |
| CPTI22\$2 | 4.579  | 0.386 | 11.876 | 0.000 |
| CPTI22\$3 | 6.533  | 0.387 | 16.897 | 0.000 |
| CPTI23\$1 | 0.638  | 0.116 | 5.493  | 0.000 |
| CPTI23\$2 | 1.840  | 0.146 | 12.578 | 0.000 |
| CPTI23\$3 | 3.095  | 0.168 | 18.415 | 0.000 |

|           |       |       |        |       |
|-----------|-------|-------|--------|-------|
| CPTI24\$1 | 1.650 | 0.169 | 9.773  | 0.000 |
| CPTI24\$2 | 3.287 | 0.221 | 14.882 | 0.000 |
| CPTI24\$3 | 4.330 | 0.244 | 17.737 | 0.000 |
| CPTI25\$1 | 1.481 | 0.188 | 7.861  | 0.000 |
| CPTI25\$2 | 3.567 | 0.254 | 14.068 | 0.000 |
| CPTI25\$3 | 5.338 | 0.295 | 18.120 | 0.000 |
| CPTI26\$1 | 3.334 | 0.482 | 6.914  | 0.000 |
| CPTI26\$2 | 5.864 | 0.658 | 8.907  | 0.000 |
| CPTI26\$3 | 7.937 | 0.805 | 9.861  | 0.000 |
| CPTI27\$1 | 2.083 | 0.276 | 7.553  | 0.000 |
| CPTI27\$2 | 4.264 | 0.404 | 10.567 | 0.000 |
| CPTI27\$3 | 5.857 | 0.399 | 14.695 | 0.000 |
| CPTI28\$1 | 0.989 | 0.148 | 6.690  | 0.000 |
| CPTI28\$2 | 2.602 | 0.190 | 13.663 | 0.000 |
| CPTI28\$3 | 4.256 | 0.218 | 19.554 | 0.000 |

Variances

|     |       |       |       |       |
|-----|-------|-------|-------|-------|
| GD  | 1.455 | 0.225 | 6.476 | 0.000 |
| CU  | 1.321 | 0.228 | 5.802 | 0.000 |
| INS | 1.428 | 0.221 | 6.469 | 0.000 |

Residual Variances

|        |       |       |         |         |
|--------|-------|-------|---------|---------|
| CPTI1  | 1.000 | 0.000 | 999.000 | 999.000 |
| CPTI2  | 1.000 | 0.000 | 999.000 | 999.000 |
| CPTI3  | 1.000 | 0.000 | 999.000 | 999.000 |
| CPTI4  | 1.000 | 0.000 | 999.000 | 999.000 |
| CPTI5  | 1.000 | 0.000 | 999.000 | 999.000 |
| CPTI6  | 1.000 | 0.000 | 999.000 | 999.000 |
| CPTI7  | 1.000 | 0.000 | 999.000 | 999.000 |
| CPTI8  | 1.000 | 0.000 | 999.000 | 999.000 |
| CPTI9  | 1.000 | 0.000 | 999.000 | 999.000 |
| CPTI10 | 1.000 | 0.000 | 999.000 | 999.000 |
| CPTI11 | 1.000 | 0.000 | 999.000 | 999.000 |
| CPTI12 | 1.000 | 0.000 | 999.000 | 999.000 |
| CPTI13 | 1.000 | 0.000 | 999.000 | 999.000 |
| CPTI14 | 1.000 | 0.000 | 999.000 | 999.000 |
| CPTI15 | 1.000 | 0.000 | 999.000 | 999.000 |
| CPTI16 | 1.000 | 0.000 | 999.000 | 999.000 |
| CPTI17 | 1.000 | 0.000 | 999.000 | 999.000 |
| CPTI18 | 1.000 | 0.000 | 999.000 | 999.000 |
| CPTI19 | 1.000 | 0.000 | 999.000 | 999.000 |
| CPTI20 | 1.000 | 0.000 | 999.000 | 999.000 |
| CPTI21 | 1.000 | 0.000 | 999.000 | 999.000 |
| CPTI22 | 1.000 | 0.000 | 999.000 | 999.000 |
| CPTI23 | 1.000 | 0.000 | 999.000 | 999.000 |
| CPTI24 | 1.000 | 0.000 | 999.000 | 999.000 |
| CPTI25 | 1.000 | 0.000 | 999.000 | 999.000 |
| CPTI26 | 1.000 | 0.000 | 999.000 | 999.000 |
| CPTI27 | 1.000 | 0.000 | 999.000 | 999.000 |
| CPTI28 | 1.000 | 0.000 | 999.000 | 999.000 |

THE MODEL ESTIMATION TERMINATED NORMALLY

MODEL FIT INFORMATION

Number of Free Parameters 202

Chi-Square Test of Model Fit

|                    |           |
|--------------------|-----------|
| Value              | 2524.725* |
| Degrees of Freedom | 722       |
| P-Value            | 0.0000    |

Chi-Square Contribution From Each Group

|        |          |
|--------|----------|
| PETITS | 1147.933 |
| GRANS  | 1376.792 |

\* The chi-square value for MLM, MLMV, MLR, ULSMV, WLSM and WLSMV cannot be used for chi-square difference testing in the regular way. MLM, MLR and WLSM chi-square difference testing is described on the Mplus website. MLMV, WLSMV, and ULSMV difference testing is done using the DIFFTEST option.

RMSEA (Root Mean Square Error Of Approximation)

|                          |       |       |
|--------------------------|-------|-------|
| Estimate                 | 0.082 |       |
| 90 Percent C.I.          | 0.079 | 0.085 |
| Probability RMSEA <= .05 | 0.000 |       |

CFI/TLI

|     |       |
|-----|-------|
| CFI | 0.972 |
| TLI | 0.970 |

Chi-Square Test of Model Fit for the Baseline Model

|                    |           |
|--------------------|-----------|
| Value              | 64374.820 |
| Degrees of Freedom | 756       |
| P-Value            | 0.0000    |

WRMR (Weighted Root Mean Square Residual)

|       |       |
|-------|-------|
| Value | 2.473 |
|-------|-------|

MODEL RESULTS

|              | Estimate | S.E.  | Est./S.E. | Two-Tailed<br>P-Value |         |
|--------------|----------|-------|-----------|-----------------------|---------|
| Group PETITS |          |       |           |                       |         |
| GD           | BY       |       |           |                       |         |
|              | CPTI5    | 2.692 | 0.270     | 9.966                 | 0.000   |
|              | CPTI7    | 1.674 | 0.205     | 8.158                 | 0.000   |
|              | CPTI9    | 2.979 | 0.369     | 8.084                 | 0.000   |
|              | CPTI15   | 3.890 | 0.570     | 6.822                 | 0.000   |
|              | CPTI18   | 2.005 | 0.254     | 7.882                 | 0.000   |
|              | CPTI21   | 2.395 | 0.319     | 7.505                 | 0.000   |
|              | CPTI24   | 1.373 | 0.174     | 7.908                 | 0.000   |
|              | CPTI26   | 3.715 | 0.564     | 6.590                 | 0.000   |
| CU           | BY       |       |           |                       |         |
|              | CPTI2    | 0.959 | 0.117     | 8.197                 | 0.000   |
|              | CPTI4    | 1.102 | 0.129     | 8.560                 | 0.000   |
|              | CPTI8    | 1.269 | 0.146     | 8.720                 | 0.000   |
|              | CPTI11   | 2.012 | 0.232     | 8.671                 | 0.000   |
|              | CPTI13   | 2.594 | 0.368     | 7.055                 | 0.000   |
|              | CPTI17   | 2.620 | 0.396     | 6.617                 | 0.000   |
|              | CPTI20   | 2.129 | 0.253     | 8.402                 | 0.000   |
|              | CPTI22   | 2.671 | 0.329     | 8.122                 | 0.000   |
|              | CPTI25   | 2.044 | 0.224     | 9.117                 | 0.000   |
|              | CPTI27   | 2.702 | 0.360     | 7.510                 | 0.000   |
| INS          | BY       |       |           |                       |         |
|              | CPTI1    | 0.556 | 0.083     | 6.676                 | 0.000   |
|              | CPTI3    | 1.375 | 0.139     | 9.904                 | 0.000   |
|              | CPTI6    | 1.448 | 0.162     | 8.944                 | 0.000   |
|              | CPTI10   | 2.021 | 0.273     | 7.412                 | 0.000   |
|              | CPTI12   | 2.448 | 0.339     | 7.212                 | 0.000   |
|              | CPTI14   | 1.822 | 0.239     | 7.614                 | 0.000   |
|              | CPTI16   | 1.611 | 0.186     | 8.675                 | 0.000   |
|              | CPTI19   | 1.739 | 0.179     | 9.690                 | 0.000   |
|              | CPTI23   | 1.402 | 0.170     | 8.244                 | 0.000   |
|              | CPTI28   | 1.771 | 0.172     | 10.308                | 0.000   |
| CU           | WITH     |       |           |                       |         |
|              | GD       | 0.812 | 0.024     | 34.214                | 0.000   |
| INS          | WITH     |       |           |                       |         |
|              | GD       | 0.726 | 0.038     | 19.233                | 0.000   |
|              | CU       | 0.779 | 0.028     | 27.674                | 0.000   |
| Means        |          |       |           |                       |         |
|              | GD       | 0.000 | 0.000     | 999.000               | 999.000 |
|              | CU       | 0.000 | 0.000     | 999.000               | 999.000 |
|              | INS      | 0.000 | 0.000     | 999.000               | 999.000 |

Thresholds

|           |        |       |        |       |
|-----------|--------|-------|--------|-------|
| CPTI1\$1  | -0.903 | 0.110 | -8.247 | 0.000 |
| CPTI1\$2  | 0.284  | 0.099 | 2.859  | 0.004 |
| CPTI1\$3  | 2.009  | 0.102 | 19.730 | 0.000 |
| CPTI2\$1  | 0.412  | 0.126 | 3.265  | 0.001 |
| CPTI2\$2  | 1.909  | 0.177 | 10.794 | 0.000 |
| CPTI2\$3  | 3.293  | 0.200 | 16.480 | 0.000 |
| CPTI3\$1  | -0.423 | 0.145 | -2.908 | 0.004 |
| CPTI3\$2  | 1.013  | 0.161 | 6.299  | 0.000 |
| CPTI3\$3  | 2.822  | 0.142 | 19.824 | 0.000 |
| CPTI4\$1  | 0.370  | 0.134 | 2.770  | 0.006 |
| CPTI4\$2  | 1.773  | 0.174 | 10.187 | 0.000 |
| CPTI4\$3  | 3.074  | 0.154 | 19.953 | 0.000 |
| CPTI5\$1  | 0.888  | 0.269 | 3.297  | 0.001 |
| CPTI5\$2  | 3.711  | 0.366 | 10.142 | 0.000 |
| CPTI5\$3  | 5.495  | 0.341 | 16.102 | 0.000 |
| CPTI6\$1  | -0.186 | 0.149 | -1.246 | 0.213 |
| CPTI6\$2  | 1.389  | 0.179 | 7.772  | 0.000 |
| CPTI6\$3  | 3.452  | 0.186 | 18.593 | 0.000 |
| CPTI7\$1  | 1.388  | 0.221 | 6.284  | 0.000 |
| CPTI7\$2  | 3.270  | 0.325 | 10.056 | 0.000 |
| CPTI7\$3  | 4.420  | 0.272 | 16.257 | 0.000 |
| CPTI8\$1  | 0.363  | 0.145 | 2.495  | 0.013 |
| CPTI8\$2  | 1.465  | 0.174 | 8.440  | 0.000 |
| CPTI8\$3  | 3.372  | 0.158 | 21.330 | 0.000 |
| CPTI9\$1  | 1.489  | 0.339 | 4.396  | 0.000 |
| CPTI9\$2  | 3.977  | 0.492 | 8.075  | 0.000 |
| CPTI9\$3  | 6.940  | 0.515 | 13.480 | 0.000 |
| CPTI10\$1 | 0.809  | 0.225 | 3.593  | 0.000 |
| CPTI10\$2 | 2.531  | 0.298 | 8.488  | 0.000 |
| CPTI10\$3 | 4.394  | 0.301 | 14.619 | 0.000 |
| CPTI11\$1 | 0.586  | 0.210 | 2.788  | 0.005 |
| CPTI11\$2 | 2.572  | 0.298 | 8.643  | 0.000 |
| CPTI11\$3 | 5.018  | 0.263 | 19.055 | 0.000 |
| CPTI12\$1 | -0.404 | 0.229 | -1.763 | 0.078 |
| CPTI12\$2 | 2.306  | 0.320 | 7.202  | 0.000 |
| CPTI12\$3 | 3.917  | 0.230 | 17.000 | 0.000 |
| CPTI13\$1 | 1.541  | 0.336 | 4.587  | 0.000 |
| CPTI13\$2 | 3.379  | 0.444 | 7.603  | 0.000 |
| CPTI13\$3 | 5.445  | 0.336 | 16.195 | 0.000 |
| CPTI14\$1 | 0.720  | 0.205 | 3.509  | 0.000 |
| CPTI14\$2 | 2.427  | 0.289 | 8.406  | 0.000 |
| CPTI14\$3 | 4.276  | 0.253 | 16.929 | 0.000 |
| CPTI15\$1 | 2.679  | 0.555 | 4.831  | 0.000 |
| CPTI15\$2 | 5.415  | 0.749 | 7.233  | 0.000 |
| CPTI15\$3 | 8.637  | 0.842 | 10.257 | 0.000 |
| CPTI16\$1 | 0.245  | 0.167 | 1.467  | 0.142 |
| CPTI16\$2 | 1.653  | 0.199 | 8.301  | 0.000 |
| CPTI16\$3 | 4.025  | 0.222 | 18.098 | 0.000 |
| CPTI17\$1 | 0.868  | 0.280 | 3.104  | 0.002 |
| CPTI17\$2 | 2.969  | 0.411 | 7.218  | 0.000 |
| CPTI17\$3 | 5.438  | 0.349 | 15.594 | 0.000 |
| CPTI18\$1 | 1.304  | 0.251 | 5.200  | 0.000 |
| CPTI18\$2 | 3.088  | 0.331 | 9.333  | 0.000 |
| CPTI18\$3 | 5.433  | 0.372 | 14.616 | 0.000 |
| CPTI19\$1 | -0.645 | 0.173 | -3.729 | 0.000 |
| CPTI19\$2 | 1.251  | 0.188 | 6.639  | 0.000 |
| CPTI19\$3 | 3.470  | 0.170 | 20.376 | 0.000 |
| CPTI20\$1 | 0.472  | 0.214 | 2.199  | 0.028 |
| CPTI20\$2 | 2.491  | 0.298 | 8.354  | 0.000 |
| CPTI20\$3 | 4.987  | 0.291 | 17.164 | 0.000 |
| CPTI21\$1 | 1.474  | 0.298 | 4.938  | 0.000 |
| CPTI21\$2 | 4.018  | 0.434 | 9.256  | 0.000 |
| CPTI21\$3 | 5.615  | 0.366 | 15.328 | 0.000 |
| CPTI22\$1 | 1.131  | 0.303 | 3.739  | 0.000 |
| CPTI22\$2 | 3.201  | 0.399 | 8.032  | 0.000 |
| CPTI22\$3 | 6.526  | 0.391 | 16.697 | 0.000 |
| CPTI23\$1 | 0.020  | 0.148 | 0.137  | 0.891 |
| CPTI23\$2 | 1.788  | 0.206 | 8.673  | 0.000 |
| CPTI23\$3 | 3.090  | 0.165 | 18.713 | 0.000 |
| CPTI24\$1 | 1.158  | 0.189 | 6.137  | 0.000 |
| CPTI24\$2 | 2.630  | 0.264 | 9.979  | 0.000 |
| CPTI24\$3 | 4.251  | 0.236 | 17.989 | 0.000 |
| CPTI25\$1 | 0.676  | 0.214 | 3.156  | 0.002 |
| CPTI25\$2 | 2.504  | 0.271 | 9.250  | 0.000 |

|                    |        |       |         |         |       |
|--------------------|--------|-------|---------|---------|-------|
| CPTI25\$3          | 5.274  | 0.287 | 18.391  | 0.000   |       |
| CPTI26\$1          | 2.738  | 0.553 | 4.951   | 0.000   |       |
| CPTI26\$2          | 5.301  | 0.774 | 6.850   | 0.000   |       |
| CPTI26\$3          | 7.686  | 0.763 | 10.074  | 0.000   |       |
| CPTI27\$1          | 1.328  | 0.316 | 4.208   | 0.000   |       |
| CPTI27\$2          | 3.363  | 0.445 | 7.557   | 0.000   |       |
| CPTI27\$3          | 5.838  | 0.420 | 13.911  | 0.000   |       |
| CPTI28\$1          | -0.143 | 0.172 | -0.832  | 0.406   |       |
| CPTI28\$2          | 1.917  | 0.223 | 8.592   | 0.000   |       |
| CPTI28\$3          | 4.242  | 0.216 | 19.599  | 0.000   |       |
| Variances          |        |       |         |         |       |
| GD                 | 1.000  | 0.000 | 999.000 | 999.000 |       |
| CU                 | 1.000  | 0.000 | 999.000 | 999.000 |       |
| INS                | 1.000  | 0.000 | 999.000 | 999.000 |       |
| Residual Variances |        |       |         |         |       |
| CPTI1              | 1.000  | 0.000 | 999.000 | 999.000 |       |
| CPTI2              | 1.000  | 0.000 | 999.000 | 999.000 |       |
| CPTI3              | 1.000  | 0.000 | 999.000 | 999.000 |       |
| CPTI4              | 1.000  | 0.000 | 999.000 | 999.000 |       |
| CPTI5              | 1.000  | 0.000 | 999.000 | 999.000 |       |
| CPTI6              | 1.000  | 0.000 | 999.000 | 999.000 |       |
| CPTI7              | 1.000  | 0.000 | 999.000 | 999.000 |       |
| CPTI8              | 1.000  | 0.000 | 999.000 | 999.000 |       |
| CPTI9              | 1.000  | 0.000 | 999.000 | 999.000 |       |
| CPTI10             | 1.000  | 0.000 | 999.000 | 999.000 |       |
| CPTI11             | 1.000  | 0.000 | 999.000 | 999.000 |       |
| CPTI12             | 1.000  | 0.000 | 999.000 | 999.000 |       |
| CPTI13             | 1.000  | 0.000 | 999.000 | 999.000 |       |
| CPTI14             | 1.000  | 0.000 | 999.000 | 999.000 |       |
| CPTI15             | 1.000  | 0.000 | 999.000 | 999.000 |       |
| CPTI16             | 1.000  | 0.000 | 999.000 | 999.000 |       |
| CPTI17             | 1.000  | 0.000 | 999.000 | 999.000 |       |
| CPTI18             | 1.000  | 0.000 | 999.000 | 999.000 |       |
| CPTI19             | 1.000  | 0.000 | 999.000 | 999.000 |       |
| CPTI20             | 1.000  | 0.000 | 999.000 | 999.000 |       |
| CPTI21             | 1.000  | 0.000 | 999.000 | 999.000 |       |
| CPTI22             | 1.000  | 0.000 | 999.000 | 999.000 |       |
| CPTI23             | 1.000  | 0.000 | 999.000 | 999.000 |       |
| CPTI24             | 1.000  | 0.000 | 999.000 | 999.000 |       |
| CPTI25             | 1.000  | 0.000 | 999.000 | 999.000 |       |
| CPTI26             | 1.000  | 0.000 | 999.000 | 999.000 |       |
| CPTI27             | 1.000  | 0.000 | 999.000 | 999.000 |       |
| CPTI28             | 1.000  | 0.000 | 999.000 | 999.000 |       |
| Group GRANS        |        |       |         |         |       |
| GD                 | BY     |       |         |         |       |
| CPTI5              |        | 2.843 | 0.219   | 12.957  | 0.000 |
| CPTI7              |        | 1.934 | 0.152   | 12.691  | 0.000 |
| CPTI9              |        | 3.816 | 0.332   | 11.499  | 0.000 |
| CPTI15             |        | 4.661 | 0.533   | 8.738   | 0.000 |
| CPTI18             |        | 2.434 | 0.197   | 12.341  | 0.000 |
| CPTI21             |        | 2.721 | 0.255   | 10.683  | 0.000 |
| CPTI24             |        | 2.072 | 0.169   | 12.254  | 0.000 |
| CPTI26             |        | 3.802 | 0.479   | 7.943   | 0.000 |
| CU                 | BY     |       |         |         |       |
| CPTI2              |        | 1.315 | 0.110   | 11.904  | 0.000 |
| CPTI4              |        | 1.201 | 0.100   | 12.065  | 0.000 |
| CPTI8              |        | 1.987 | 0.163   | 12.218  | 0.000 |
| CPTI11             |        | 2.053 | 0.186   | 11.035  | 0.000 |
| CPTI13             |        | 2.102 | 0.215   | 9.792   | 0.000 |
| CPTI17             |        | 2.726 | 0.218   | 12.517  | 0.000 |
| CPTI20             |        | 2.245 | 0.195   | 11.533  | 0.000 |
| CPTI22             |        | 3.096 | 0.307   | 10.100  | 0.000 |
| CPTI25             |        | 2.562 | 0.214   | 11.990  | 0.000 |
| CPTI27             |        | 2.916 | 0.331   | 8.806   | 0.000 |
| INS                | BY     |       |         |         |       |
| CPTI1              |        | 1.018 | 0.080   | 12.699  | 0.000 |
| CPTI3              |        | 1.711 | 0.125   | 13.719  | 0.000 |
| CPTI6              |        | 1.624 | 0.145   | 11.194  | 0.000 |
| CPTI10             |        | 2.017 | 0.189   | 10.648  | 0.000 |
| CPTI12             |        | 2.093 | 0.184   | 11.351  | 0.000 |



|            |        |       |         |         |
|------------|--------|-------|---------|---------|
| CPTI14     | 1.895  | 0.170 | 11.153  | 0.000   |
| CPTI16     | 1.881  | 0.150 | 12.569  | 0.000   |
| CPTI19     | 2.158  | 0.156 | 13.813  | 0.000   |
| CPTI23     | 1.635  | 0.135 | 12.146  | 0.000   |
| CPTI28     | 2.065  | 0.161 | 12.838  | 0.000   |
| CU         | WITH   |       |         |         |
| GD         | 0.874  | 0.015 | 60.134  | 0.000   |
| INS        | WITH   |       |         |         |
| GD         | 0.797  | 0.022 | 35.975  | 0.000   |
| CU         | 0.802  | 0.021 | 38.162  | 0.000   |
| Means      |        |       |         |         |
| GD         | 0.000  | 0.000 | 999.000 | 999.000 |
| CU         | 0.000  | 0.000 | 999.000 | 999.000 |
| INS        | 0.000  | 0.000 | 999.000 | 999.000 |
| Thresholds |        |       |         |         |
| CPTI1\$1   | -0.044 | 0.078 | -0.565  | 0.572   |
| CPTI1\$2   | 1.199  | 0.094 | 12.749  | 0.000   |
| CPTI1\$3   | 2.009  | 0.102 | 19.730  | 0.000   |
| CPTI2\$1   | 1.001  | 0.113 | 8.890   | 0.000   |
| CPTI2\$2   | 2.588  | 0.162 | 15.961  | 0.000   |
| CPTI2\$3   | 3.293  | 0.200 | 16.480  | 0.000   |
| CPTI3\$1   | 0.518  | 0.115 | 4.489   | 0.000   |
| CPTI3\$2   | 1.846  | 0.139 | 13.268  | 0.000   |
| CPTI3\$3   | 2.822  | 0.142 | 19.824  | 0.000   |
| CPTI4\$1   | 0.860  | 0.103 | 8.346   | 0.000   |
| CPTI4\$2   | 2.285  | 0.141 | 16.178  | 0.000   |
| CPTI4\$3   | 3.074  | 0.154 | 19.953  | 0.000   |
| CPTI5\$1   | 1.288  | 0.200 | 6.448   | 0.000   |
| CPTI5\$2   | 3.388  | 0.246 | 13.766  | 0.000   |
| CPTI5\$3   | 5.495  | 0.341 | 16.102  | 0.000   |
| CPTI6\$1   | 1.018  | 0.133 | 7.670   | 0.000   |
| CPTI6\$2   | 2.324  | 0.172 | 13.542  | 0.000   |
| CPTI6\$3   | 3.452  | 0.186 | 18.593  | 0.000   |
| CPTI7\$1   | 1.578  | 0.167 | 9.434   | 0.000   |
| CPTI7\$2   | 2.987  | 0.208 | 14.337  | 0.000   |
| CPTI7\$3   | 4.420  | 0.272 | 16.257  | 0.000   |
| CPTI8\$1   | 1.151  | 0.153 | 7.511   | 0.000   |
| CPTI8\$2   | 2.710  | 0.205 | 13.215  | 0.000   |
| CPTI8\$3   | 3.372  | 0.158 | 21.330  | 0.000   |
| CPTI9\$1   | 2.084  | 0.297 | 7.023   | 0.000   |
| CPTI9\$2   | 4.768  | 0.380 | 12.553  | 0.000   |
| CPTI9\$3   | 6.940  | 0.515 | 13.480  | 0.000   |
| CPTI10\$1  | 1.576  | 0.188 | 8.387   | 0.000   |
| CPTI10\$2  | 3.116  | 0.251 | 12.424  | 0.000   |
| CPTI10\$3  | 4.394  | 0.301 | 14.619  | 0.000   |
| CPTI11\$1  | 1.463  | 0.181 | 8.084   | 0.000   |
| CPTI11\$2  | 3.308  | 0.269 | 12.279  | 0.000   |
| CPTI11\$3  | 5.018  | 0.263 | 19.055  | 0.000   |
| CPTI12\$1  | 0.336  | 0.131 | 2.558   | 0.011   |
| CPTI12\$2  | 2.110  | 0.188 | 11.230  | 0.000   |
| CPTI12\$3  | 3.917  | 0.230 | 17.000  | 0.000   |
| CPTI13\$1  | 1.730  | 0.212 | 8.161   | 0.000   |
| CPTI13\$2  | 3.404  | 0.301 | 11.320  | 0.000   |
| CPTI13\$3  | 5.445  | 0.336 | 16.195  | 0.000   |
| CPTI14\$1  | 1.202  | 0.155 | 7.748   | 0.000   |
| CPTI14\$2  | 2.966  | 0.229 | 12.949  | 0.000   |
| CPTI14\$3  | 4.276  | 0.253 | 16.929  | 0.000   |
| CPTI15\$1  | 3.308  | 0.482 | 6.865   | 0.000   |
| CPTI15\$2  | 6.369  | 0.643 | 9.898   | 0.000   |
| CPTI15\$3  | 8.637  | 0.842 | 10.257  | 0.000   |
| CPTI16\$1  | 1.184  | 0.151 | 7.849   | 0.000   |
| CPTI16\$2  | 2.923  | 0.204 | 14.327  | 0.000   |
| CPTI16\$3  | 4.025  | 0.222 | 18.098  | 0.000   |
| CPTI17\$1  | 1.678  | 0.216 | 7.764   | 0.000   |
| CPTI17\$2  | 3.847  | 0.274 | 14.035  | 0.000   |
| CPTI17\$3  | 5.438  | 0.349 | 15.594  | 0.000   |
| CPTI18\$1  | 1.732  | 0.204 | 8.496   | 0.000   |
| CPTI18\$2  | 3.398  | 0.246 | 13.802  | 0.000   |
| CPTI18\$3  | 5.433  | 0.372 | 14.616  | 0.000   |
| CPTI19\$1  | 0.517  | 0.137 | 3.761   | 0.000   |
| CPTI19\$2  | 2.286  | 0.171 | 13.402  | 0.000   |
| CPTI19\$3  | 3.470  | 0.170 | 20.376  | 0.000   |

|           |       |       |        |       |
|-----------|-------|-------|--------|-------|
| CPTI20\$1 | 1.298 | 0.179 | 7.245  | 0.000 |
| CPTI20\$2 | 3.173 | 0.257 | 12.327 | 0.000 |
| CPTI20\$3 | 4.987 | 0.291 | 17.164 | 0.000 |
| CPTI21\$1 | 1.824 | 0.243 | 7.500  | 0.000 |
| CPTI21\$2 | 3.908 | 0.339 | 11.543 | 0.000 |
| CPTI21\$3 | 5.615 | 0.366 | 15.328 | 0.000 |
| CPTI22\$1 | 2.337 | 0.306 | 7.632  | 0.000 |
| CPTI22\$2 | 4.584 | 0.425 | 10.778 | 0.000 |
| CPTI22\$3 | 6.526 | 0.391 | 16.697 | 0.000 |
| CPTI23\$1 | 0.634 | 0.116 | 5.451  | 0.000 |
| CPTI23\$2 | 1.828 | 0.144 | 12.654 | 0.000 |
| CPTI23\$3 | 3.090 | 0.165 | 18.713 | 0.000 |
| CPTI24\$1 | 1.738 | 0.184 | 9.453  | 0.000 |
| CPTI24\$2 | 3.463 | 0.231 | 14.975 | 0.000 |
| CPTI24\$3 | 4.251 | 0.236 | 17.989 | 0.000 |
| CPTI25\$1 | 1.513 | 0.201 | 7.541  | 0.000 |
| CPTI25\$2 | 3.643 | 0.280 | 13.030 | 0.000 |
| CPTI25\$3 | 5.274 | 0.287 | 18.391 | 0.000 |
| CPTI26\$1 | 3.121 | 0.458 | 6.809  | 0.000 |
| CPTI26\$2 | 5.490 | 0.620 | 8.856  | 0.000 |
| CPTI26\$3 | 7.686 | 0.763 | 10.074 | 0.000 |
| CPTI27\$1 | 2.047 | 0.293 | 6.989  | 0.000 |
| CPTI27\$2 | 4.191 | 0.444 | 9.429  | 0.000 |
| CPTI27\$3 | 5.838 | 0.420 | 13.911 | 0.000 |
| CPTI28\$1 | 0.980 | 0.151 | 6.500  | 0.000 |
| CPTI28\$2 | 2.580 | 0.199 | 12.984 | 0.000 |
| CPTI28\$3 | 4.242 | 0.216 | 19.599 | 0.000 |

VariANCES

|     |       |       |         |         |
|-----|-------|-------|---------|---------|
| GD  | 1.000 | 0.000 | 999.000 | 999.000 |
| CU  | 1.000 | 0.000 | 999.000 | 999.000 |
| INS | 1.000 | 0.000 | 999.000 | 999.000 |

Residual VariANCES

|        |       |       |         |         |
|--------|-------|-------|---------|---------|
| CPTI1  | 1.000 | 0.000 | 999.000 | 999.000 |
| CPTI2  | 1.000 | 0.000 | 999.000 | 999.000 |
| CPTI3  | 1.000 | 0.000 | 999.000 | 999.000 |
| CPTI4  | 1.000 | 0.000 | 999.000 | 999.000 |
| CPTI5  | 1.000 | 0.000 | 999.000 | 999.000 |
| CPTI6  | 1.000 | 0.000 | 999.000 | 999.000 |
| CPTI7  | 1.000 | 0.000 | 999.000 | 999.000 |
| CPTI8  | 1.000 | 0.000 | 999.000 | 999.000 |
| CPTI9  | 1.000 | 0.000 | 999.000 | 999.000 |
| CPTI10 | 1.000 | 0.000 | 999.000 | 999.000 |
| CPTI11 | 1.000 | 0.000 | 999.000 | 999.000 |
| CPTI12 | 1.000 | 0.000 | 999.000 | 999.000 |
| CPTI13 | 1.000 | 0.000 | 999.000 | 999.000 |
| CPTI14 | 1.000 | 0.000 | 999.000 | 999.000 |
| CPTI15 | 1.000 | 0.000 | 999.000 | 999.000 |
| CPTI16 | 1.000 | 0.000 | 999.000 | 999.000 |
| CPTI17 | 1.000 | 0.000 | 999.000 | 999.000 |
| CPTI18 | 1.000 | 0.000 | 999.000 | 999.000 |
| CPTI19 | 1.000 | 0.000 | 999.000 | 999.000 |
| CPTI20 | 1.000 | 0.000 | 999.000 | 999.000 |
| CPTI21 | 1.000 | 0.000 | 999.000 | 999.000 |
| CPTI22 | 1.000 | 0.000 | 999.000 | 999.000 |
| CPTI23 | 1.000 | 0.000 | 999.000 | 999.000 |
| CPTI24 | 1.000 | 0.000 | 999.000 | 999.000 |
| CPTI25 | 1.000 | 0.000 | 999.000 | 999.000 |
| CPTI26 | 1.000 | 0.000 | 999.000 | 999.000 |
| CPTI27 | 1.000 | 0.000 | 999.000 | 999.000 |
| CPTI28 | 1.000 | 0.000 | 999.000 | 999.000 |

INPUT READING TERMINATED NORMALLY

CFA CPTI: Configural Invariance

SUMMARY OF ANALYSIS

|                                       |     |
|---------------------------------------|-----|
| Number of groups                      | 2   |
| Number of observations                |     |
| Group MALE                            | 363 |
| Group FEMALE                          | 380 |
| Total sample size                     | 743 |
| Number of dependent variables         | 28  |
| Number of independent variables       | 0   |
| Number of continuous latent variables | 3   |

Observed dependent variables

Binary and ordered categorical (ordinal)

|        |        |        |        |        |        |
|--------|--------|--------|--------|--------|--------|
| CPTI1  | CPTI2  | CPTI3  | CPTI4  | CPTI5  | CPTI6  |
| CPTI7  | CPTI8  | CPTI9  | CPTI10 | CPTI11 | CPTI12 |
| CPTI13 | CPTI14 | CPTI15 | CPTI16 | CPTI17 | CPTI18 |
| CPTI19 | CPTI20 | CPTI21 | CPTI22 | CPTI23 | CPTI24 |
| CPTI25 | CPTI26 | CPTI27 | CPTI28 |        |        |

Continuous latent variables

|    |    |     |
|----|----|-----|
| GD | CU | INS |
|----|----|-----|

Variables with special functions

|                   |      |
|-------------------|------|
| Grouping variable | SEXE |
|-------------------|------|

|                                               |           |
|-----------------------------------------------|-----------|
| Estimator                                     | WLSMV     |
| Maximum number of iterations                  | 1000      |
| Convergence criterion                         | 0.500D-04 |
| Maximum number of steepest descent iterations | 20        |
| Maximum number of iterations for H1           | 2000      |
| Convergence criterion for H1                  | 0.100D-03 |
| Parameterization                              | THETA     |

Input data file(s)

CPTI.dat

Input data format FREE

SUMMARY OF DATA

|                                 |   |
|---------------------------------|---|
| Group MALE                      |   |
| Number of missing data patterns | 1 |
| Group FEMALE                    |   |
| Number of missing data patterns | 1 |

COVARIANCE COVERAGE OF DATA

Minimum covariance coverage value 0.100

PROPORTION OF DATA PRESENT FOR MALE

MODEL FIT INFORMATION

Number of Free Parameters 152

Chi-Square Test of Model Fit

|                    |           |
|--------------------|-----------|
| Value              | 2497.707* |
| Degrees of Freedom | 772       |
| P-Value            | 0.0000    |

Chi-Square Contribution From Each Group

MALE 1298.110  
 FEMALE 1199.597

\* The chi-square value for MLM, MLMV, MLR, ULSMV, WLSM and WLSMV cannot be used for chi-square difference testing in the regular way. MLM, MLR and WLSM chi-square difference testing is described on the Mplus website. MLMV, WLSMV, and ULSMV difference testing is done using the DIFFTEST option.

RMSEA (Root Mean Square Error Of Approximation)

Estimate 0.078  
 90 Percent C.I. 0.074 0.081  
 Probability RMSEA <= .05 0.000

CFI/TLI

CFI 0.971  
 TLI 0.972

Chi-Square Test of Model Fit for the Baseline Model

Value 60948.660  
 Degrees of Freedom 756  
 P-Value 0.0000

WRMR (Weighted Root Mean Square Residual)

Value 2.396

MODEL RESULTS

|            | Estimate | S.E.  | Est./S.E. | Two-Tailed<br>P-Value |
|------------|----------|-------|-----------|-----------------------|
| Group MALE |          |       |           |                       |
| GD BY      |          |       |           |                       |
| CPTI5      | 2.826    | 0.240 | 11.776    | 0.000                 |
| CPTI7      | 1.894    | 0.167 | 11.347    | 0.000                 |
| CPTI9      | 3.458    | 0.354 | 9.780     | 0.000                 |
| CPTI15     | 4.459    | 0.614 | 7.259     | 0.000                 |
| CPTI18     | 2.531    | 0.260 | 9.745     | 0.000                 |
| CPTI21     | 2.970    | 0.362 | 8.199     | 0.000                 |
| CPTI24     | 2.063    | 0.213 | 9.687     | 0.000                 |
| CPTI26     | 3.922    | 0.550 | 7.129     | 0.000                 |
| CU BY      |          |       |           |                       |
| CPTI2      | 1.215    | 0.109 | 11.176    | 0.000                 |
| CPTI4      | 1.190    | 0.109 | 10.891    | 0.000                 |
| CPTI8      | 1.805    | 0.165 | 10.921    | 0.000                 |
| CPTI11     | 2.095    | 0.205 | 10.237    | 0.000                 |
| CPTI13     | 2.366    | 0.250 | 9.452     | 0.000                 |
| CPTI17     | 2.359    | 0.244 | 9.658     | 0.000                 |
| CPTI20     | 2.084    | 0.203 | 10.274    | 0.000                 |
| CPTI22     | 2.906    | 0.296 | 9.808     | 0.000                 |
| CPTI25     | 2.381    | 0.216 | 11.012    | 0.000                 |
| CPTI27     | 3.774    | 0.515 | 7.328     | 0.000                 |
| INS BY     |          |       |           |                       |
| CPTI1      | 0.926    | 0.086 | 10.751    | 0.000                 |
| CPTI3      | 1.770    | 0.150 | 11.831    | 0.000                 |
| CPTI6      | 1.530    | 0.149 | 10.298    | 0.000                 |
| CPTI10     | 2.020    | 0.233 | 8.660     | 0.000                 |
| CPTI12     | 2.140    | 0.228 | 9.393     | 0.000                 |
| CPTI14     | 1.749    | 0.180 | 9.703     | 0.000                 |
| CPTI16     | 1.743    | 0.152 | 11.433    | 0.000                 |
| CPTI19     | 1.946    | 0.169 | 11.526    | 0.000                 |
| CPTI23     | 1.388    | 0.136 | 10.235    | 0.000                 |
| CPTI28     | 1.752    | 0.149 | 11.783    | 0.000                 |
| CU WITH    |          |       |           |                       |

|            |        |       |         |         |
|------------|--------|-------|---------|---------|
| GD         | 0.840  | 0.016 | 53.346  | 0.000   |
| INS        | WITH   |       |         |         |
| GD         | 0.738  | 0.029 | 25.319  | 0.000   |
| CU         | 0.754  | 0.025 | 30.099  | 0.000   |
| Means      |        |       |         |         |
| GD         | 0.000  | 0.000 | 999.000 | 999.000 |
| CU         | 0.000  | 0.000 | 999.000 | 999.000 |
| INS        | 0.000  | 0.000 | 999.000 | 999.000 |
| Thresholds |        |       |         |         |
| CPTI1\$1   | -0.527 | 0.082 | -6.464  | 0.000   |
| CPTI1\$2   | 0.719  | 0.089 | 8.051   | 0.000   |
| CPTI1\$3   | 2.112  | 0.155 | 13.605  | 0.000   |
| CPTI2\$1   | 0.528  | 0.103 | 5.113   | 0.000   |
| CPTI2\$2   | 2.106  | 0.162 | 12.999  | 0.000   |
| CPTI2\$3   | 3.373  | 0.240 | 14.078  | 0.000   |
| CPTI3\$1   | -0.141 | 0.122 | -1.149  | 0.251   |
| CPTI3\$2   | 1.386  | 0.153 | 9.067   | 0.000   |
| CPTI3\$3   | 2.860  | 0.222 | 12.861  | 0.000   |
| CPTI4\$1   | 0.441  | 0.099 | 4.446   | 0.000   |
| CPTI4\$2   | 1.875  | 0.151 | 12.393  | 0.000   |
| CPTI4\$3   | 2.931  | 0.211 | 13.904  | 0.000   |
| CPTI5\$1   | 0.685  | 0.204 | 3.357   | 0.001   |
| CPTI5\$2   | 3.011  | 0.266 | 11.340  | 0.000   |
| CPTI5\$3   | 5.045  | 0.411 | 12.284  | 0.000   |
| CPTI6\$1   | 0.306  | 0.113 | 2.707   | 0.007   |
| CPTI6\$2   | 1.702  | 0.161 | 10.575  | 0.000   |
| CPTI6\$3   | 3.302  | 0.240 | 13.737  | 0.000   |
| CPTI7\$1   | 1.222  | 0.167 | 7.301   | 0.000   |
| CPTI7\$2   | 2.783  | 0.232 | 11.996  | 0.000   |
| CPTI7\$3   | 4.247  | 0.331 | 12.833  | 0.000   |
| CPTI8\$1   | 0.488  | 0.139 | 3.513   | 0.000   |
| CPTI8\$2   | 1.938  | 0.187 | 10.362  | 0.000   |
| CPTI8\$3   | 3.351  | 0.239 | 14.031  | 0.000   |
| CPTI9\$1   | 1.227  | 0.272 | 4.513   | 0.000   |
| CPTI9\$2   | 3.751  | 0.394 | 9.529   | 0.000   |
| CPTI9\$3   | 6.085  | 0.573 | 10.622  | 0.000   |
| CPTI10\$1  | 0.929  | 0.173 | 5.385   | 0.000   |
| CPTI10\$2  | 2.561  | 0.274 | 9.338   | 0.000   |
| CPTI10\$3  | 4.102  | 0.390 | 10.518  | 0.000   |
| CPTI11\$1  | 0.752  | 0.167 | 4.517   | 0.000   |
| CPTI11\$2  | 2.698  | 0.260 | 10.360  | 0.000   |
| CPTI11\$3  | 4.814  | 0.337 | 14.286  | 0.000   |
| CPTI12\$1  | -0.333 | 0.147 | -2.270  | 0.023   |
| CPTI12\$2  | 1.742  | 0.207 | 8.411   | 0.000   |
| CPTI12\$3  | 3.460  | 0.297 | 11.645  | 0.000   |
| CPTI13\$1  | 1.247  | 0.214 | 5.829   | 0.000   |
| CPTI13\$2  | 3.068  | 0.305 | 10.050  | 0.000   |
| CPTI13\$3  | 5.253  | 0.452 | 11.622  | 0.000   |
| CPTI14\$1  | 0.621  | 0.134 | 4.626   | 0.000   |
| CPTI14\$2  | 2.301  | 0.216 | 10.673  | 0.000   |
| CPTI14\$3  | 3.742  | 0.320 | 11.686  | 0.000   |
| CPTI15\$1  | 2.346  | 0.453 | 5.177   | 0.000   |
| CPTI15\$2  | 5.317  | 0.679 | 7.833   | 0.000   |
| CPTI15\$3  | 7.807  | 1.024 | 7.624   | 0.000   |
| CPTI16\$1  | 0.498  | 0.130 | 3.822   | 0.000   |
| CPTI16\$2  | 2.096  | 0.185 | 11.349  | 0.000   |
| CPTI16\$3  | 3.699  | 0.278 | 13.320  | 0.000   |
| CPTI17\$1  | 0.702  | 0.179 | 3.924   | 0.000   |
| CPTI17\$2  | 2.584  | 0.270 | 9.585   | 0.000   |
| CPTI17\$3  | 4.381  | 0.332 | 13.198  | 0.000   |
| CPTI18\$1  | 1.318  | 0.217 | 6.086   | 0.000   |
| CPTI18\$2  | 3.184  | 0.319 | 9.974   | 0.000   |
| CPTI18\$3  | 5.545  | 0.529 | 10.484  | 0.000   |
| CPTI19\$1  | -0.297 | 0.131 | -2.259  | 0.024   |
| CPTI19\$2  | 1.479  | 0.162 | 9.101   | 0.000   |
| CPTI19\$3  | 3.089  | 0.221 | 13.968  | 0.000   |
| CPTI20\$1  | 0.489  | 0.155 | 3.153   | 0.002   |
| CPTI20\$2  | 2.296  | 0.237 | 9.688   | 0.000   |
| CPTI20\$3  | 4.301  | 0.326 | 13.198  | 0.000   |
| CPTI21\$1  | 1.405  | 0.277 | 5.076   | 0.000   |
| CPTI21\$2  | 3.888  | 0.433 | 8.976   | 0.000   |
| CPTI21\$3  | 5.741  | 0.584 | 9.823   | 0.000   |
| CPTI22\$1  | 1.222  | 0.242 | 5.046   | 0.000   |

|                    |       |       |         |         |       |
|--------------------|-------|-------|---------|---------|-------|
| CPTI22\$2          | 3.391 | 0.337 | 10.070  | 0.000   |       |
| CPTI22\$3          | 5.778 | 0.462 | 12.500  | 0.000   |       |
| CPTI23\$1          | 0.095 | 0.101 | 0.939   | 0.348   |       |
| CPTI23\$2          | 1.381 | 0.144 | 9.569   | 0.000   |       |
| CPTI23\$3          | 2.564 | 0.202 | 12.675  | 0.000   |       |
| CPTI24\$1          | 1.358 | 0.198 | 6.877   | 0.000   |       |
| CPTI24\$2          | 3.175 | 0.300 | 10.578  | 0.000   |       |
| CPTI24\$3          | 4.474 | 0.367 | 12.191  | 0.000   |       |
| CPTI25\$1          | 0.669 | 0.178 | 3.760   | 0.000   |       |
| CPTI25\$2          | 2.702 | 0.247 | 10.927  | 0.000   |       |
| CPTI25\$3          | 4.865 | 0.362 | 13.430  | 0.000   |       |
| CPTI26\$1          | 2.422 | 0.443 | 5.472   | 0.000   |       |
| CPTI26\$2          | 4.861 | 0.664 | 7.326   | 0.000   |       |
| CPTI26\$3          | 7.297 | 0.877 | 8.325   | 0.000   |       |
| CPTI27\$1          | 1.580 | 0.347 | 4.553   | 0.000   |       |
| CPTI27\$2          | 4.392 | 0.571 | 7.694   | 0.000   |       |
| CPTI27\$3          | 6.860 | 0.756 | 9.076   | 0.000   |       |
| CPTI28\$1          | 0.166 | 0.120 | 1.382   | 0.167   |       |
| CPTI28\$2          | 1.785 | 0.168 | 10.626  | 0.000   |       |
| CPTI28\$3          | 3.504 | 0.240 | 14.587  | 0.000   |       |
| Variances          |       |       |         |         |       |
| GD                 | 1.000 | 0.000 | 999.000 | 999.000 |       |
| CU                 | 1.000 | 0.000 | 999.000 | 999.000 |       |
| INS                | 1.000 | 0.000 | 999.000 | 999.000 |       |
| Residual Variances |       |       |         |         |       |
| CPTI1              | 1.000 | 0.000 | 999.000 | 999.000 |       |
| CPTI2              | 1.000 | 0.000 | 999.000 | 999.000 |       |
| CPTI3              | 1.000 | 0.000 | 999.000 | 999.000 |       |
| CPTI4              | 1.000 | 0.000 | 999.000 | 999.000 |       |
| CPTI5              | 1.000 | 0.000 | 999.000 | 999.000 |       |
| CPTI6              | 1.000 | 0.000 | 999.000 | 999.000 |       |
| CPTI7              | 1.000 | 0.000 | 999.000 | 999.000 |       |
| CPTI8              | 1.000 | 0.000 | 999.000 | 999.000 |       |
| CPTI9              | 1.000 | 0.000 | 999.000 | 999.000 |       |
| CPTI10             | 1.000 | 0.000 | 999.000 | 999.000 |       |
| CPTI11             | 1.000 | 0.000 | 999.000 | 999.000 |       |
| CPTI12             | 1.000 | 0.000 | 999.000 | 999.000 |       |
| CPTI13             | 1.000 | 0.000 | 999.000 | 999.000 |       |
| CPTI14             | 1.000 | 0.000 | 999.000 | 999.000 |       |
| CPTI15             | 1.000 | 0.000 | 999.000 | 999.000 |       |
| CPTI16             | 1.000 | 0.000 | 999.000 | 999.000 |       |
| CPTI17             | 1.000 | 0.000 | 999.000 | 999.000 |       |
| CPTI18             | 1.000 | 0.000 | 999.000 | 999.000 |       |
| CPTI19             | 1.000 | 0.000 | 999.000 | 999.000 |       |
| CPTI20             | 1.000 | 0.000 | 999.000 | 999.000 |       |
| CPTI21             | 1.000 | 0.000 | 999.000 | 999.000 |       |
| CPTI22             | 1.000 | 0.000 | 999.000 | 999.000 |       |
| CPTI23             | 1.000 | 0.000 | 999.000 | 999.000 |       |
| CPTI24             | 1.000 | 0.000 | 999.000 | 999.000 |       |
| CPTI25             | 1.000 | 0.000 | 999.000 | 999.000 |       |
| CPTI26             | 1.000 | 0.000 | 999.000 | 999.000 |       |
| CPTI27             | 1.000 | 0.000 | 999.000 | 999.000 |       |
| CPTI28             | 1.000 | 0.000 | 999.000 | 999.000 |       |
| Group FEMALE       |       |       |         |         |       |
| GD                 | BY    |       |         |         |       |
| CPTI5              |       | 2.826 | 0.240   | 11.776  | 0.000 |
| CPTI7              |       | 1.894 | 0.167   | 11.347  | 0.000 |
| CPTI9              |       | 3.458 | 0.354   | 9.780   | 0.000 |
| CPTI15             |       | 4.459 | 0.614   | 7.259   | 0.000 |
| CPTI18             |       | 2.531 | 0.260   | 9.745   | 0.000 |
| CPTI21             |       | 2.970 | 0.362   | 8.199   | 0.000 |
| CPTI24             |       | 2.063 | 0.213   | 9.687   | 0.000 |
| CPTI26             |       | 3.922 | 0.550   | 7.129   | 0.000 |
| CU                 | BY    |       |         |         |       |
| CPTI2              |       | 1.215 | 0.109   | 11.176  | 0.000 |
| CPTI4              |       | 1.190 | 0.109   | 10.891  | 0.000 |
| CPTI8              |       | 1.805 | 0.165   | 10.921  | 0.000 |
| CPTI11             |       | 2.095 | 0.205   | 10.237  | 0.000 |
| CPTI13             |       | 2.366 | 0.250   | 9.452   | 0.000 |
| CPTI17             |       | 2.359 | 0.244   | 9.658   | 0.000 |
| CPTI20             |       | 2.084 | 0.203   | 10.274  | 0.000 |

|            |        |       |        |       |
|------------|--------|-------|--------|-------|
| CPTI22     | 2.906  | 0.296 | 9.808  | 0.000 |
| CPTI25     | 2.381  | 0.216 | 11.012 | 0.000 |
| CPTI27     | 3.774  | 0.515 | 7.328  | 0.000 |
| INS BY     |        |       |        |       |
| CPTI1      | 0.926  | 0.086 | 10.751 | 0.000 |
| CPTI3      | 1.770  | 0.150 | 11.831 | 0.000 |
| CPTI6      | 1.530  | 0.149 | 10.298 | 0.000 |
| CPTI10     | 2.020  | 0.233 | 8.660  | 0.000 |
| CPTI12     | 2.140  | 0.228 | 9.393  | 0.000 |
| CPTI14     | 1.749  | 0.180 | 9.703  | 0.000 |
| CPTI16     | 1.743  | 0.152 | 11.433 | 0.000 |
| CPTI19     | 1.946  | 0.169 | 11.526 | 0.000 |
| CPTI23     | 1.388  | 0.136 | 10.235 | 0.000 |
| CPTI28     | 1.752  | 0.149 | 11.783 | 0.000 |
| CU WITH    |        |       |        |       |
| GD         | 0.770  | 0.131 | 5.859  | 0.000 |
| INS WITH   |        |       |        |       |
| GD         | 0.770  | 0.129 | 5.951  | 0.000 |
| CU         | 0.833  | 0.125 | 6.645  | 0.000 |
| Means      |        |       |        |       |
| GD         | -0.327 | 0.127 | -2.581 | 0.010 |
| CU         | -0.454 | 0.123 | -3.700 | 0.000 |
| INS        | -0.444 | 0.104 | -4.287 | 0.000 |
| Thresholds |        |       |        |       |
| CPTI1\$1   | -0.527 | 0.082 | -6.464 | 0.000 |
| CPTI1\$2   | 0.719  | 0.089 | 8.051  | 0.000 |
| CPTI1\$3   | 2.112  | 0.155 | 13.605 | 0.000 |
| CPTI2\$1   | 0.528  | 0.103 | 5.113  | 0.000 |
| CPTI2\$2   | 2.106  | 0.162 | 12.999 | 0.000 |
| CPTI2\$3   | 3.373  | 0.240 | 14.078 | 0.000 |
| CPTI3\$1   | -0.141 | 0.122 | -1.149 | 0.251 |
| CPTI3\$2   | 1.386  | 0.153 | 9.067  | 0.000 |
| CPTI3\$3   | 2.860  | 0.222 | 12.861 | 0.000 |
| CPTI4\$1   | 0.441  | 0.099 | 4.446  | 0.000 |
| CPTI4\$2   | 1.875  | 0.151 | 12.393 | 0.000 |
| CPTI4\$3   | 2.931  | 0.211 | 13.904 | 0.000 |
| CPTI5\$1   | 0.685  | 0.204 | 3.357  | 0.001 |
| CPTI5\$2   | 3.011  | 0.266 | 11.340 | 0.000 |
| CPTI5\$3   | 5.045  | 0.411 | 12.284 | 0.000 |
| CPTI6\$1   | 0.306  | 0.113 | 2.707  | 0.007 |
| CPTI6\$2   | 1.702  | 0.161 | 10.575 | 0.000 |
| CPTI6\$3   | 3.302  | 0.240 | 13.737 | 0.000 |
| CPTI7\$1   | 1.222  | 0.167 | 7.301  | 0.000 |
| CPTI7\$2   | 2.783  | 0.232 | 11.996 | 0.000 |
| CPTI7\$3   | 4.247  | 0.331 | 12.833 | 0.000 |
| CPTI8\$1   | 0.488  | 0.139 | 3.513  | 0.000 |
| CPTI8\$2   | 1.938  | 0.187 | 10.362 | 0.000 |
| CPTI8\$3   | 3.351  | 0.239 | 14.031 | 0.000 |
| CPTI9\$1   | 1.227  | 0.272 | 4.513  | 0.000 |
| CPTI9\$2   | 3.751  | 0.394 | 9.529  | 0.000 |
| CPTI9\$3   | 6.085  | 0.573 | 10.622 | 0.000 |
| CPTI10\$1  | 0.929  | 0.173 | 5.385  | 0.000 |
| CPTI10\$2  | 2.561  | 0.274 | 9.338  | 0.000 |
| CPTI10\$3  | 4.102  | 0.390 | 10.518 | 0.000 |
| CPTI11\$1  | 0.752  | 0.167 | 4.517  | 0.000 |
| CPTI11\$2  | 2.698  | 0.260 | 10.360 | 0.000 |
| CPTI11\$3  | 4.814  | 0.337 | 14.286 | 0.000 |
| CPTI12\$1  | -0.333 | 0.147 | -2.270 | 0.023 |
| CPTI12\$2  | 1.742  | 0.207 | 8.411  | 0.000 |
| CPTI12\$3  | 3.460  | 0.297 | 11.645 | 0.000 |
| CPTI13\$1  | 1.247  | 0.214 | 5.829  | 0.000 |
| CPTI13\$2  | 3.068  | 0.305 | 10.050 | 0.000 |
| CPTI13\$3  | 5.253  | 0.452 | 11.622 | 0.000 |
| CPTI14\$1  | 0.621  | 0.134 | 4.626  | 0.000 |
| CPTI14\$2  | 2.301  | 0.216 | 10.673 | 0.000 |
| CPTI14\$3  | 3.742  | 0.320 | 11.686 | 0.000 |
| CPTI15\$1  | 2.346  | 0.453 | 5.177  | 0.000 |
| CPTI15\$2  | 5.317  | 0.679 | 7.833  | 0.000 |
| CPTI15\$3  | 7.807  | 1.024 | 7.624  | 0.000 |
| CPTI16\$1  | 0.498  | 0.130 | 3.822  | 0.000 |
| CPTI16\$2  | 2.096  | 0.185 | 11.349 | 0.000 |

|                    |        |       |        |       |
|--------------------|--------|-------|--------|-------|
| CPTI16\$3          | 3.699  | 0.278 | 13.320 | 0.000 |
| CPTI17\$1          | 0.702  | 0.179 | 3.924  | 0.000 |
| CPTI17\$2          | 2.584  | 0.270 | 9.585  | 0.000 |
| CPTI17\$3          | 4.381  | 0.332 | 13.198 | 0.000 |
| CPTI18\$1          | 1.318  | 0.217 | 6.086  | 0.000 |
| CPTI18\$2          | 3.184  | 0.319 | 9.974  | 0.000 |
| CPTI18\$3          | 5.545  | 0.529 | 10.484 | 0.000 |
| CPTI19\$1          | -0.297 | 0.131 | -2.259 | 0.024 |
| CPTI19\$2          | 1.479  | 0.162 | 9.101  | 0.000 |
| CPTI19\$3          | 3.089  | 0.221 | 13.968 | 0.000 |
| CPTI20\$1          | 0.489  | 0.155 | 3.153  | 0.002 |
| CPTI20\$2          | 2.296  | 0.237 | 9.688  | 0.000 |
| CPTI20\$3          | 4.301  | 0.326 | 13.198 | 0.000 |
| CPTI21\$1          | 1.405  | 0.277 | 5.076  | 0.000 |
| CPTI21\$2          | 3.888  | 0.433 | 8.976  | 0.000 |
| CPTI21\$3          | 5.741  | 0.584 | 9.823  | 0.000 |
| CPTI22\$1          | 1.222  | 0.242 | 5.046  | 0.000 |
| CPTI22\$2          | 3.391  | 0.337 | 10.070 | 0.000 |
| CPTI22\$3          | 5.778  | 0.462 | 12.500 | 0.000 |
| CPTI23\$1          | 0.095  | 0.101 | 0.939  | 0.348 |
| CPTI23\$2          | 1.381  | 0.144 | 9.569  | 0.000 |
| CPTI23\$3          | 2.564  | 0.202 | 12.675 | 0.000 |
| CPTI24\$1          | 1.358  | 0.198 | 6.877  | 0.000 |
| CPTI24\$2          | 3.175  | 0.300 | 10.578 | 0.000 |
| CPTI24\$3          | 4.474  | 0.367 | 12.191 | 0.000 |
| CPTI25\$1          | 0.669  | 0.178 | 3.760  | 0.000 |
| CPTI25\$2          | 2.702  | 0.247 | 10.927 | 0.000 |
| CPTI25\$3          | 4.865  | 0.362 | 13.430 | 0.000 |
| CPTI26\$1          | 2.422  | 0.443 | 5.472  | 0.000 |
| CPTI26\$2          | 4.861  | 0.664 | 7.326  | 0.000 |
| CPTI26\$3          | 7.297  | 0.877 | 8.325  | 0.000 |
| CPTI27\$1          | 1.580  | 0.347 | 4.553  | 0.000 |
| CPTI27\$2          | 4.392  | 0.571 | 7.694  | 0.000 |
| CPTI27\$3          | 6.860  | 0.756 | 9.076  | 0.000 |
| CPTI28\$1          | 0.166  | 0.120 | 1.382  | 0.167 |
| CPTI28\$2          | 1.785  | 0.168 | 10.626 | 0.000 |
| CPTI28\$3          | 3.504  | 0.240 | 14.587 | 0.000 |
| Variances          |        |       |        |       |
| GD                 | 0.894  | 0.181 | 4.929  | 0.000 |
| CU                 | 0.914  | 0.161 | 5.691  | 0.000 |
| INS                | 1.089  | 0.186 | 5.841  | 0.000 |
| Residual Variances |        |       |        |       |
| CPTI1              | 1.202  | 0.248 | 4.841  | 0.000 |
| CPTI2              | 1.055  | 0.235 | 4.492  | 0.000 |
| CPTI3              | 1.507  | 0.314 | 4.797  | 0.000 |
| CPTI4              | 1.038  | 0.221 | 4.698  | 0.000 |
| CPTI5              | 1.117  | 0.307 | 3.638  | 0.000 |
| CPTI6              | 1.175  | 0.277 | 4.238  | 0.000 |
| CPTI7              | 1.164  | 0.289 | 4.024  | 0.000 |
| CPTI8              | 1.319  | 0.315 | 4.184  | 0.000 |
| CPTI9              | 0.824  | 0.246 | 3.352  | 0.001 |
| CPTI10             | 0.963  | 0.262 | 3.671  | 0.000 |
| CPTI11             | 1.306  | 0.345 | 3.791  | 0.000 |
| CPTI12             | 1.237  | 0.357 | 3.470  | 0.001 |
| CPTI13             | 1.450  | 0.444 | 3.264  | 0.001 |
| CPTI14             | 0.752  | 0.192 | 3.914  | 0.000 |
| CPTI15             | 1.121  | 0.423 | 2.649  | 0.008 |
| CPTI16             | 1.041  | 0.222 | 4.699  | 0.000 |
| CPTI17             | 0.673  | 0.171 | 3.931  | 0.000 |
| CPTI18             | 1.523  | 0.429 | 3.553  | 0.000 |
| CPTI19             | 0.852  | 0.173 | 4.917  | 0.000 |
| CPTI20             | 0.773  | 0.208 | 3.722  | 0.000 |
| CPTI21             | 1.462  | 0.387 | 3.774  | 0.000 |
| CPTI22             | 1.001  | 0.310 | 3.229  | 0.001 |
| CPTI23             | 0.786  | 0.204 | 3.850  | 0.000 |
| CPTI24             | 1.459  | 0.396 | 3.683  | 0.000 |
| CPTI25             | 0.997  | 0.272 | 3.658  | 0.000 |
| CPTI26             | 1.094  | 0.495 | 2.209  | 0.027 |
| CPTI27             | 3.213  | 1.040 | 3.089  | 0.002 |
| CPTI28             | 0.635  | 0.127 | 4.990  | 0.000 |
| R-SQUARE           |        |       |        |       |
| Group MALE         |        |       |        |       |



| Observed Variable | Estimate | S.E.  | Est./S.E. | Two-Tailed P-Value | Scale Factors |
|-------------------|----------|-------|-----------|--------------------|---------------|
| CPTI1             | 0.461    | 0.046 | 9.980     | 0.000              | 0.734         |
| CPTI2             | 0.596    | 0.043 | 13.840    | 0.000              | 0.635         |
| CPTI3             | 0.758    | 0.031 | 24.451    | 0.000              | 0.492         |
| CPTI4             | 0.586    | 0.045 | 13.151    | 0.000              | 0.643         |
| CPTI5             | 0.889    | 0.017 | 52.922    | 0.000              | 0.334         |
| CPTI6             | 0.701    | 0.041 | 17.209    | 0.000              | 0.547         |
| CPTI7             | 0.782    | 0.030 | 26.021    | 0.000              | 0.467         |
| CPTI8             | 0.765    | 0.033 | 23.249    | 0.000              | 0.485         |
| CPTI9             | 0.923    | 0.015 | 63.355    | 0.000              | 0.278         |
| CPTI10            | 0.803    | 0.037 | 22.001    | 0.000              | 0.444         |
| CPTI11            | 0.814    | 0.030 | 27.583    | 0.000              | 0.431         |
| CPTI12            | 0.821    | 0.031 | 26.212    | 0.000              | 0.423         |
| CPTI13            | 0.848    | 0.027 | 31.193    | 0.000              | 0.389         |
| CPTI14            | 0.754    | 0.038 | 19.689    | 0.000              | 0.496         |
| CPTI15            | 0.952    | 0.013 | 75.802    | 0.000              | 0.219         |
| CPTI16            | 0.752    | 0.033 | 23.082    | 0.000              | 0.498         |
| CPTI17            | 0.848    | 0.027 | 31.694    | 0.000              | 0.390         |
| CPTI18            | 0.865    | 0.024 | 36.090    | 0.000              | 0.367         |
| CPTI19            | 0.791    | 0.029 | 27.581    | 0.000              | 0.457         |
| CPTI20            | 0.813    | 0.030 | 27.450    | 0.000              | 0.433         |
| CPTI21            | 0.898    | 0.022 | 40.255    | 0.000              | 0.319         |
| CPTI22            | 0.894    | 0.019 | 46.317    | 0.000              | 0.325         |
| CPTI23            | 0.658    | 0.044 | 14.974    | 0.000              | 0.585         |
| CPTI24            | 0.810    | 0.032 | 25.465    | 0.000              | 0.436         |
| CPTI25            | 0.850    | 0.023 | 36.715    | 0.000              | 0.387         |
| CPTI26            | 0.939    | 0.016 | 58.390    | 0.000              | 0.247         |
| CPTI27            | 0.934    | 0.017 | 55.844    | 0.000              | 0.256         |
| CPTI28            | 0.754    | 0.031 | 23.973    | 0.000              | 0.496         |

Group FEMALE

| Observed Variable | Estimate | S.E.  | Est./S.E. | Two-Tailed P-Value | Scale Factors |
|-------------------|----------|-------|-----------|--------------------|---------------|
| CPTI1             | 0.437    | 0.044 | 9.953     | 0.000              | 0.684         |
| CPTI2             | 0.561    | 0.049 | 11.369    | 0.000              | 0.645         |
| CPTI3             | 0.694    | 0.035 | 19.786    | 0.000              | 0.451         |
| CPTI4             | 0.555    | 0.045 | 12.240    | 0.000              | 0.655         |
| CPTI5             | 0.865    | 0.025 | 34.831    | 0.000              | 0.348         |
| CPTI6             | 0.685    | 0.045 | 15.168    | 0.000              | 0.518         |
| CPTI7             | 0.734    | 0.040 | 18.346    | 0.000              | 0.478         |
| CPTI8             | 0.693    | 0.043 | 16.277    | 0.000              | 0.482         |
| CPTI9             | 0.928    | 0.018 | 52.645    | 0.000              | 0.295         |
| CPTI10            | 0.822    | 0.033 | 24.768    | 0.000              | 0.430         |
| CPTI11            | 0.754    | 0.038 | 19.845    | 0.000              | 0.434         |
| CPTI12            | 0.801    | 0.037 | 21.903    | 0.000              | 0.401         |
| CPTI13            | 0.779    | 0.044 | 17.606    | 0.000              | 0.390         |
| CPTI14            | 0.816    | 0.036 | 22.851    | 0.000              | 0.495         |
| CPTI15            | 0.941    | 0.018 | 53.265    | 0.000              | 0.230         |
| CPTI16            | 0.761    | 0.037 | 20.523    | 0.000              | 0.480         |
| CPTI17            | 0.883    | 0.021 | 41.410    | 0.000              | 0.417         |
| CPTI18            | 0.790    | 0.036 | 22.126    | 0.000              | 0.371         |
| CPTI19            | 0.829    | 0.025 | 33.502    | 0.000              | 0.448         |
| CPTI20            | 0.837    | 0.027 | 31.339    | 0.000              | 0.459         |
| CPTI21            | 0.844    | 0.028 | 30.030    | 0.000              | 0.327         |
| CPTI22            | 0.885    | 0.028 | 31.102    | 0.000              | 0.339         |
| CPTI23            | 0.728    | 0.041 | 17.846    | 0.000              | 0.589         |
| CPTI24            | 0.723    | 0.042 | 17.174    | 0.000              | 0.436         |
| CPTI25            | 0.839    | 0.031 | 27.280    | 0.000              | 0.402         |
| CPTI26            | 0.926    | 0.027 | 34.880    | 0.000              | 0.259         |
| CPTI27            | 0.802    | 0.039 | 20.829    | 0.000              | 0.248         |
| CPTI28            | 0.840    | 0.025 | 33.567    | 0.000              | 0.501         |
